# Supplementary material for: Coumarin–furo[2,3-d]pyrimidone hybrid molecules targeting human liver cancer cells: synthesis, anticancer effect, EGFR inhibition and molecular docking studies
Source: Royal Society of Chemistry journal article supplement (doi:10.1039/d3md00668a), 2024-01-01
Supplement: d3md00668a1.pdf [file d3md00668a1.pdf]

# Supporting Information

Coumarin–furo[2,3-d]pyrimidone hybrid molecules targeting human liver cancer cells: Synthesis, anticancer effect, EGFR inhibition and molecular docking studies

Tianshuai Wang <sup>a, b, †</sup>, Yumeng Gao <sup>a, †</sup>, Fengxu Wu, Lun Luo <sup>a, b, †</sup>, Junkai Ma <sup>a, b, \*</sup>, Yanggen Hu <sup>a, b, \*</sup>

<sup>a</sup> School of Pharmaceutical Sciences and Institute of Medicinal Chemistry, Hubei University of Medicine, Shiyan 442000, China

<sup>b</sup> Hubei Key Laboratory of Wudang Local Chinese Medicine Research, Hubei University of Medicine, Shiyan 442000, China

†These authors contributed equally to this work.

\* Corresponding author. Tel.: +86-719-8891150

Yang-Gen Hu, Hubei Key Laboratory of Wudang Local Chinese Medicine Research and Institute of Medicinal Chemistry, Hubei University of Medicine, Shiyan 442000, China. Email: huyg@hbm.u.edu.cn

Junkai Ma, Hubei Key Laboratory of Wudang Local Chinese Medicine Research and Institute of Medicinal Chemistry, Hubei University of Medicine, Shiyan 442000, China. Email: majunkai17@hbm.u.edu.cn

## **Contents:**

1.  $^1\text{H}$  NMR of Compounds 6a-n
2.  $^{13}\text{C}$  NMR of Compounds 6a-n
3. ESI-MS of Compounds 6a-n
4.  $^1\text{H}$  NMR of Compounds 10a-i
5.  $^{13}\text{C}$  NMR of Compounds 10a-i
6. ESI-MS of Compounds 10a-n

**$^1\text{H}$  NMR of Compounds 6a-n  
(Fig. S1-14)**

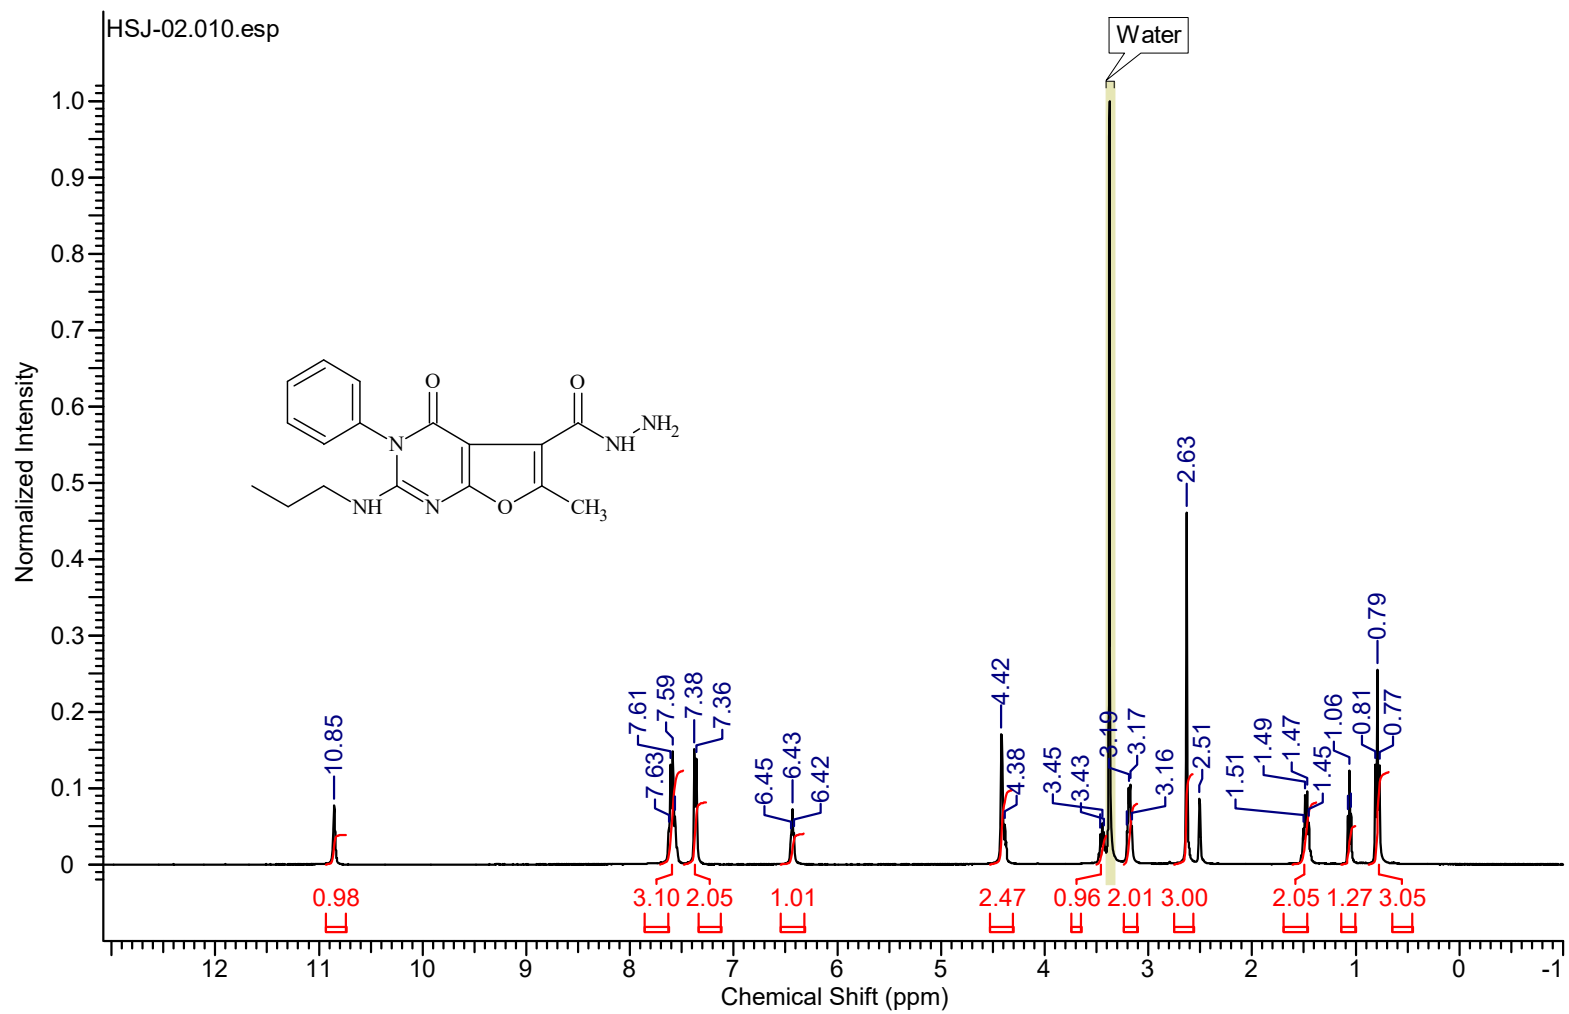

Fig.S1: <sup>1</sup>H NMR spectrum of compound 6a

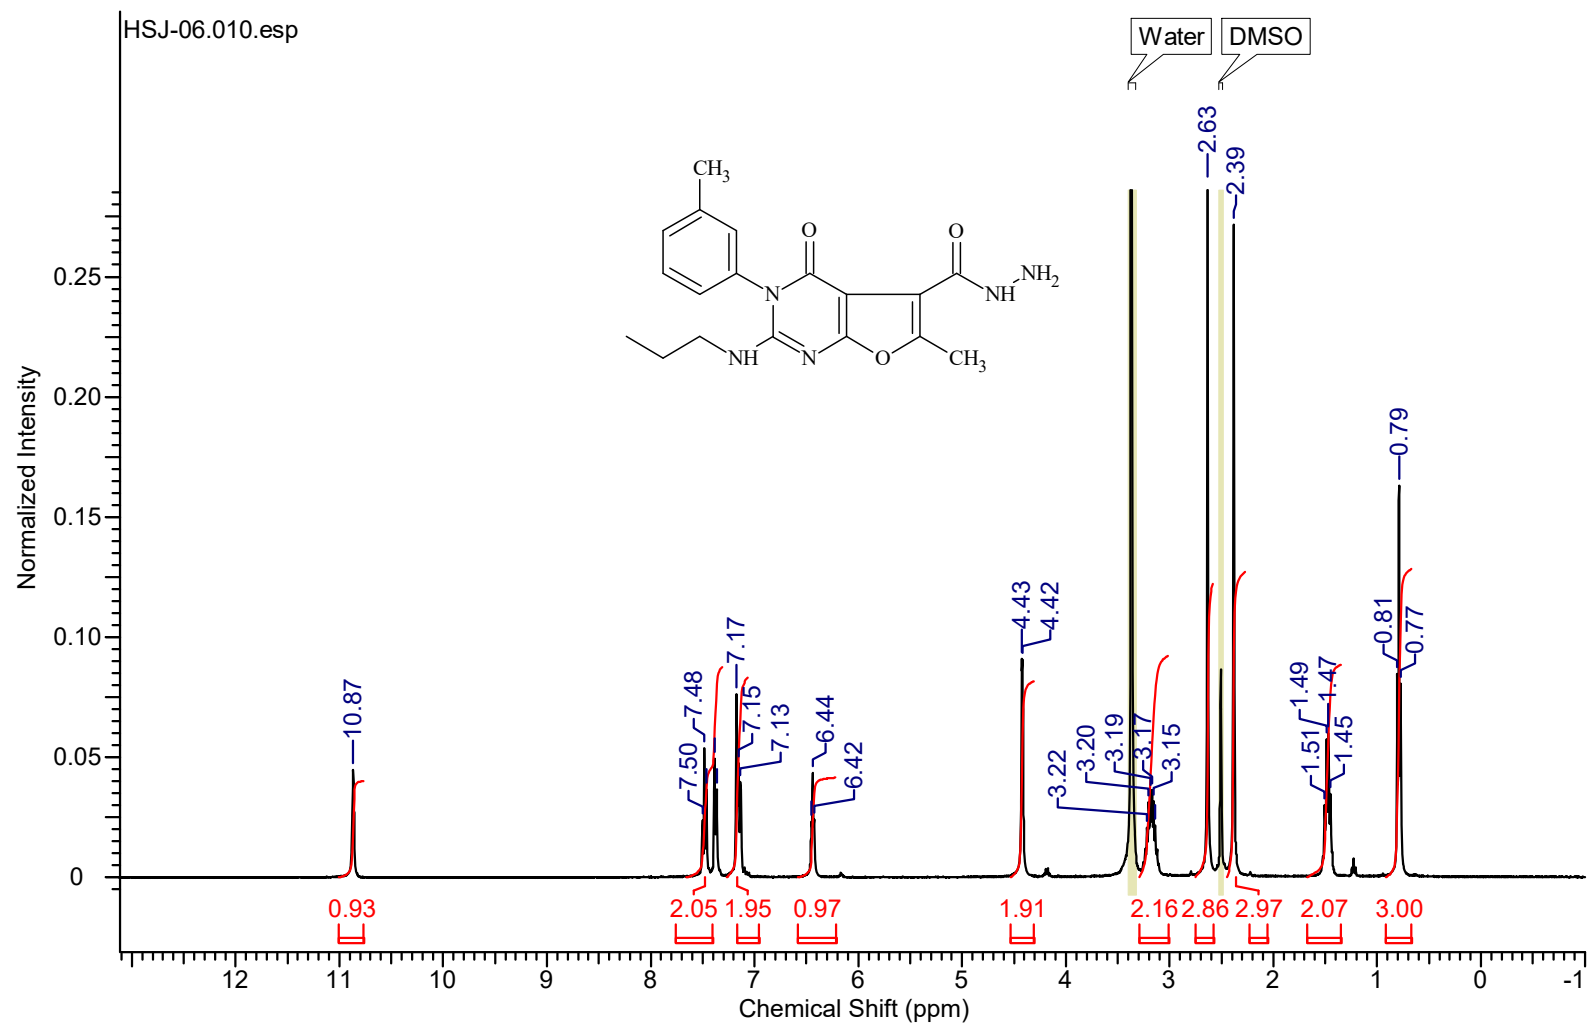

Fig.S2:  $^1\text{H}$  NMR spectrum of compound **6b**

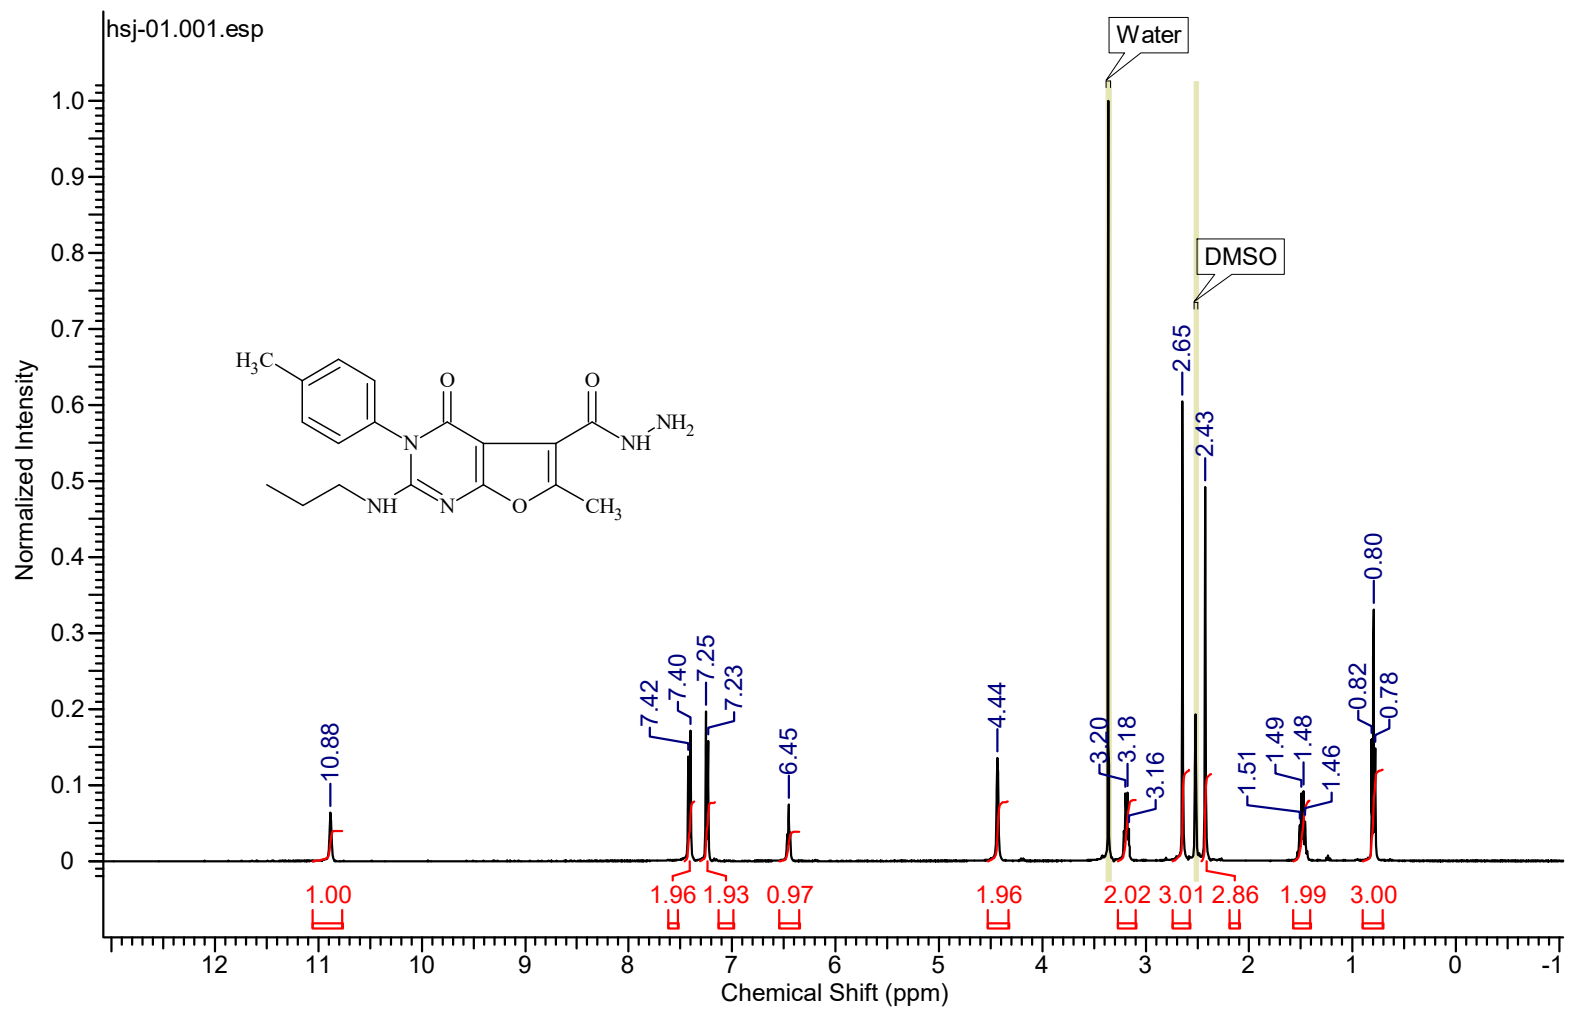

**Fig.S3:** <sup>1</sup>H NMR spectrum of compound **6c**

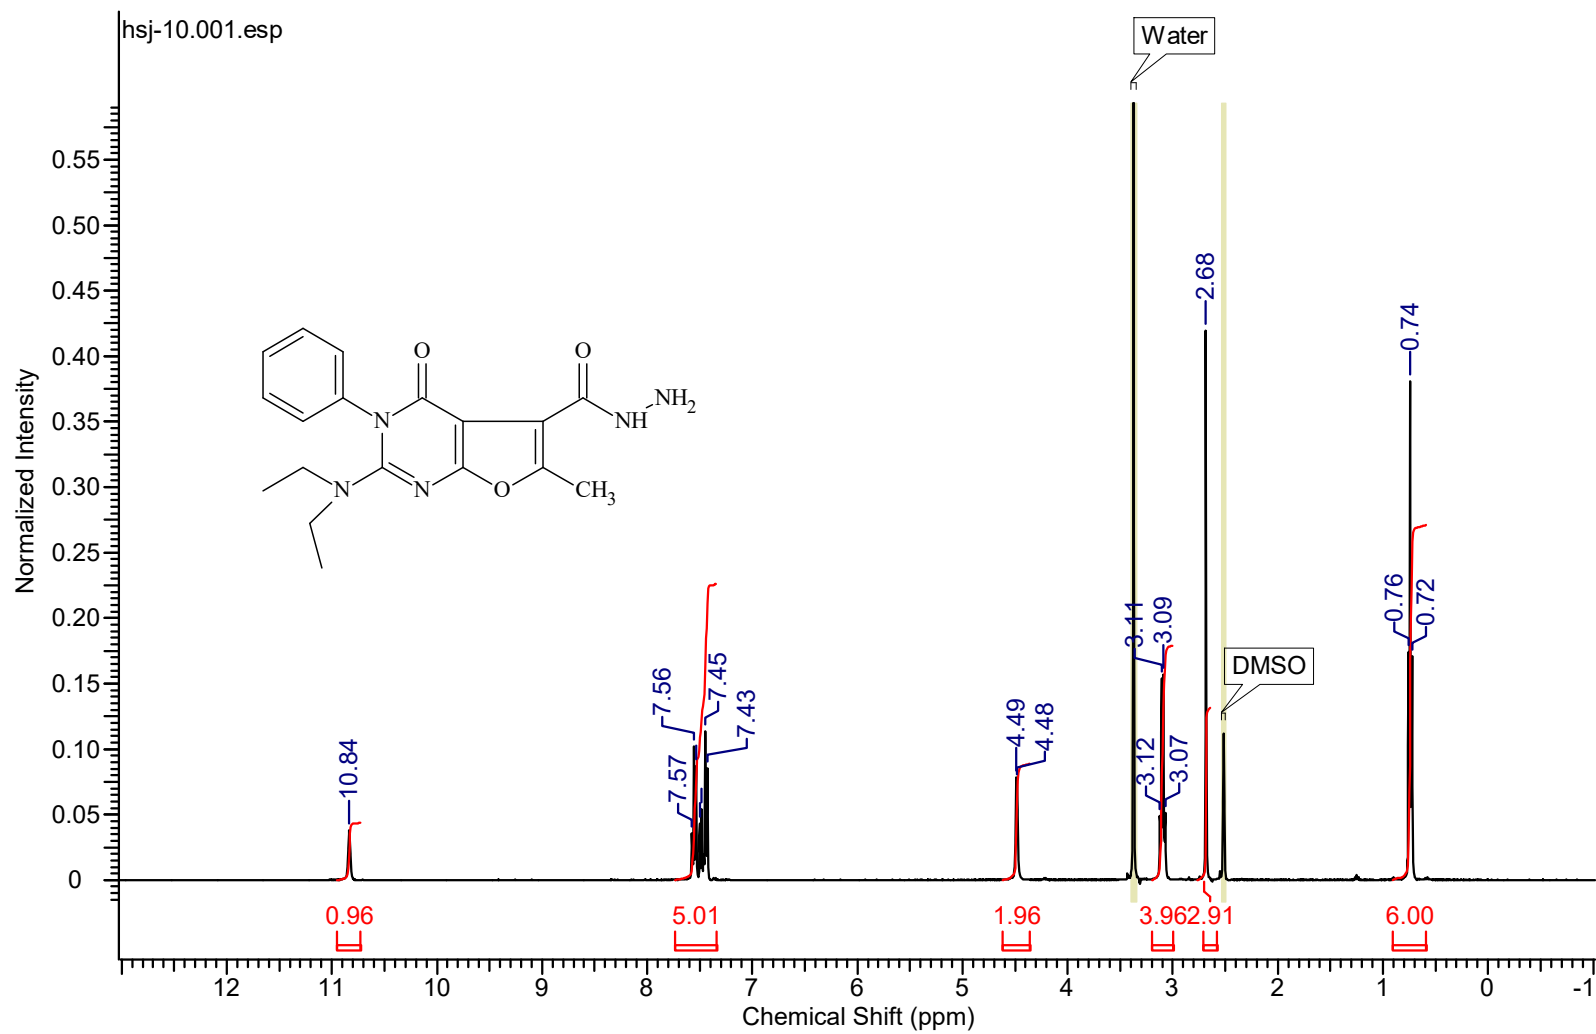

Fig.S4: <sup>1</sup>H NMR spectrum of compound 6d

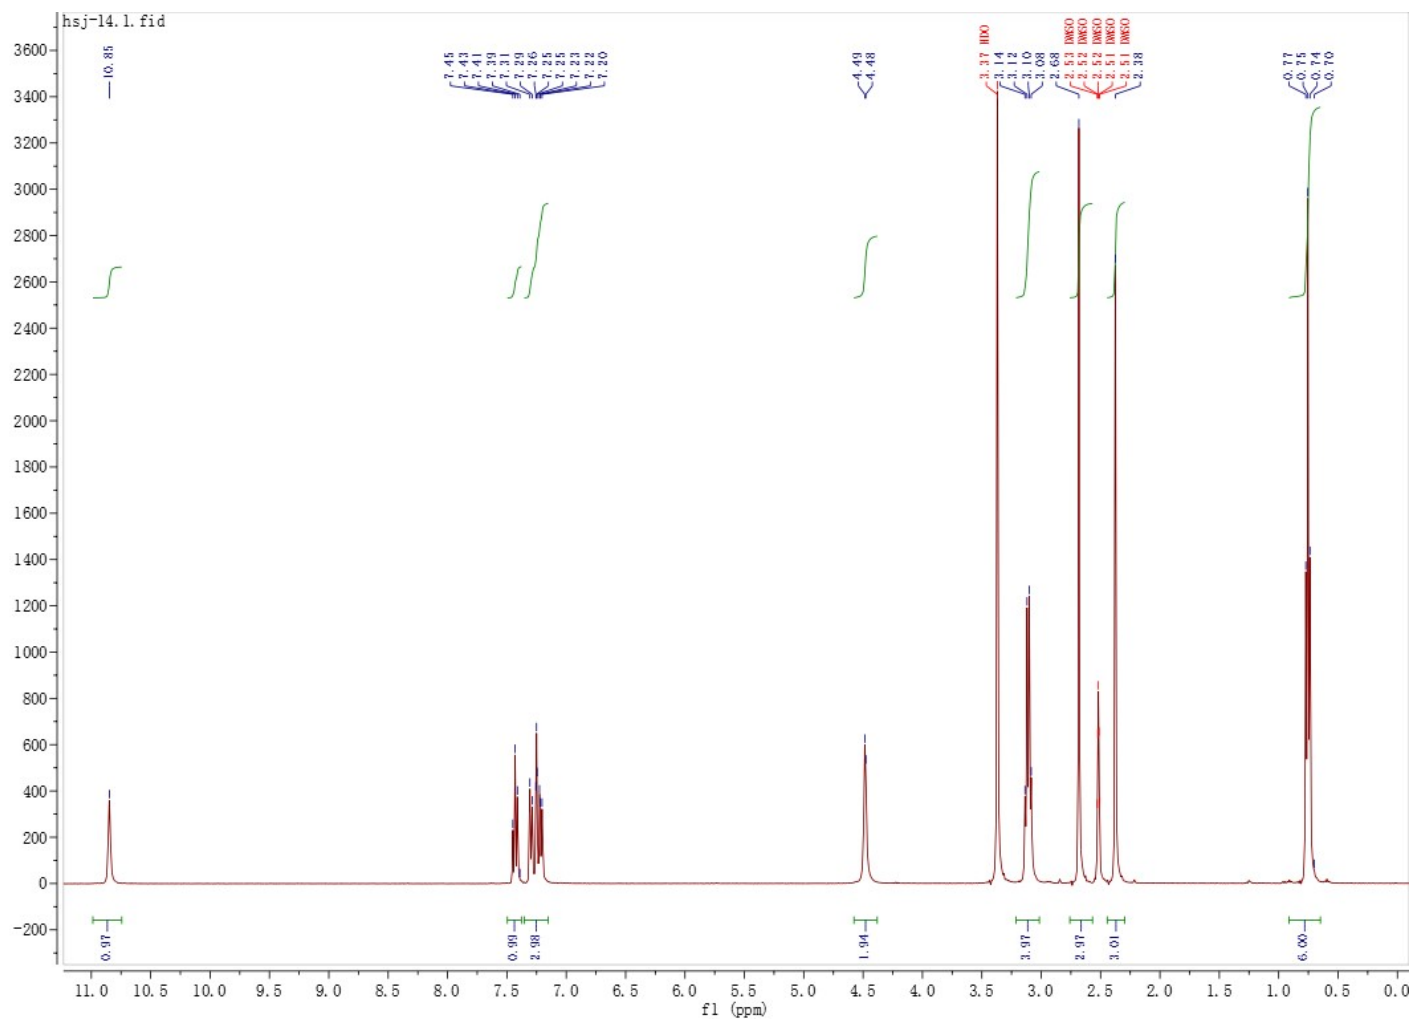

Fig.S5:  $^1\text{H}$  NMR spectrum of compound **6e**



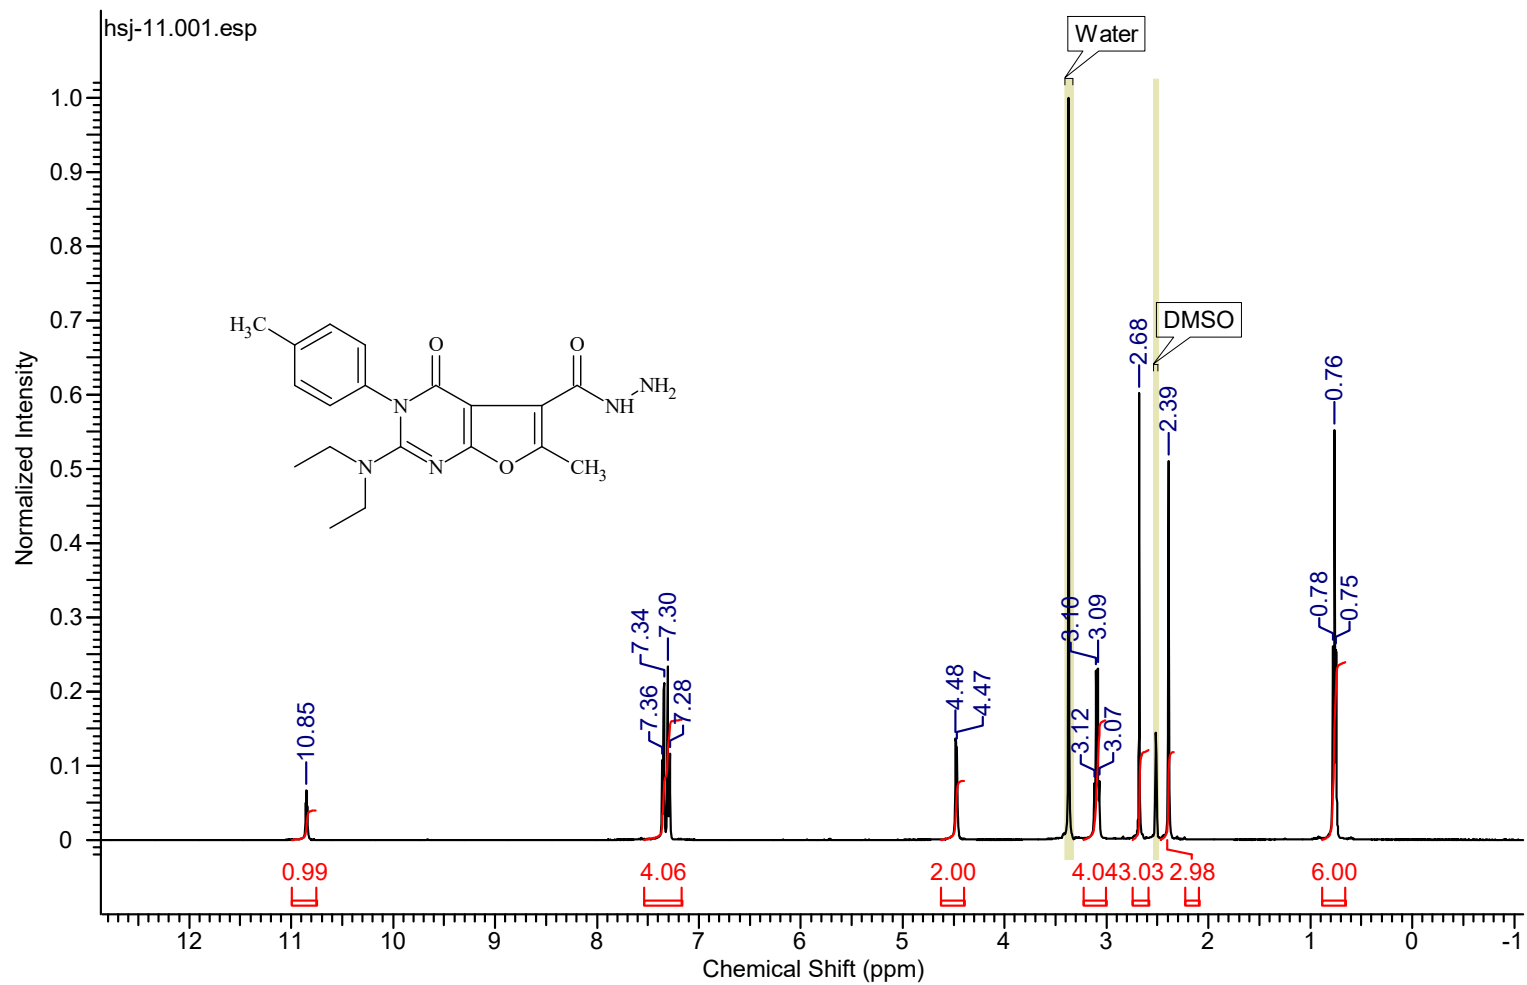

Fig.S6: <sup>1</sup>H NMR spectrum of compound 6f

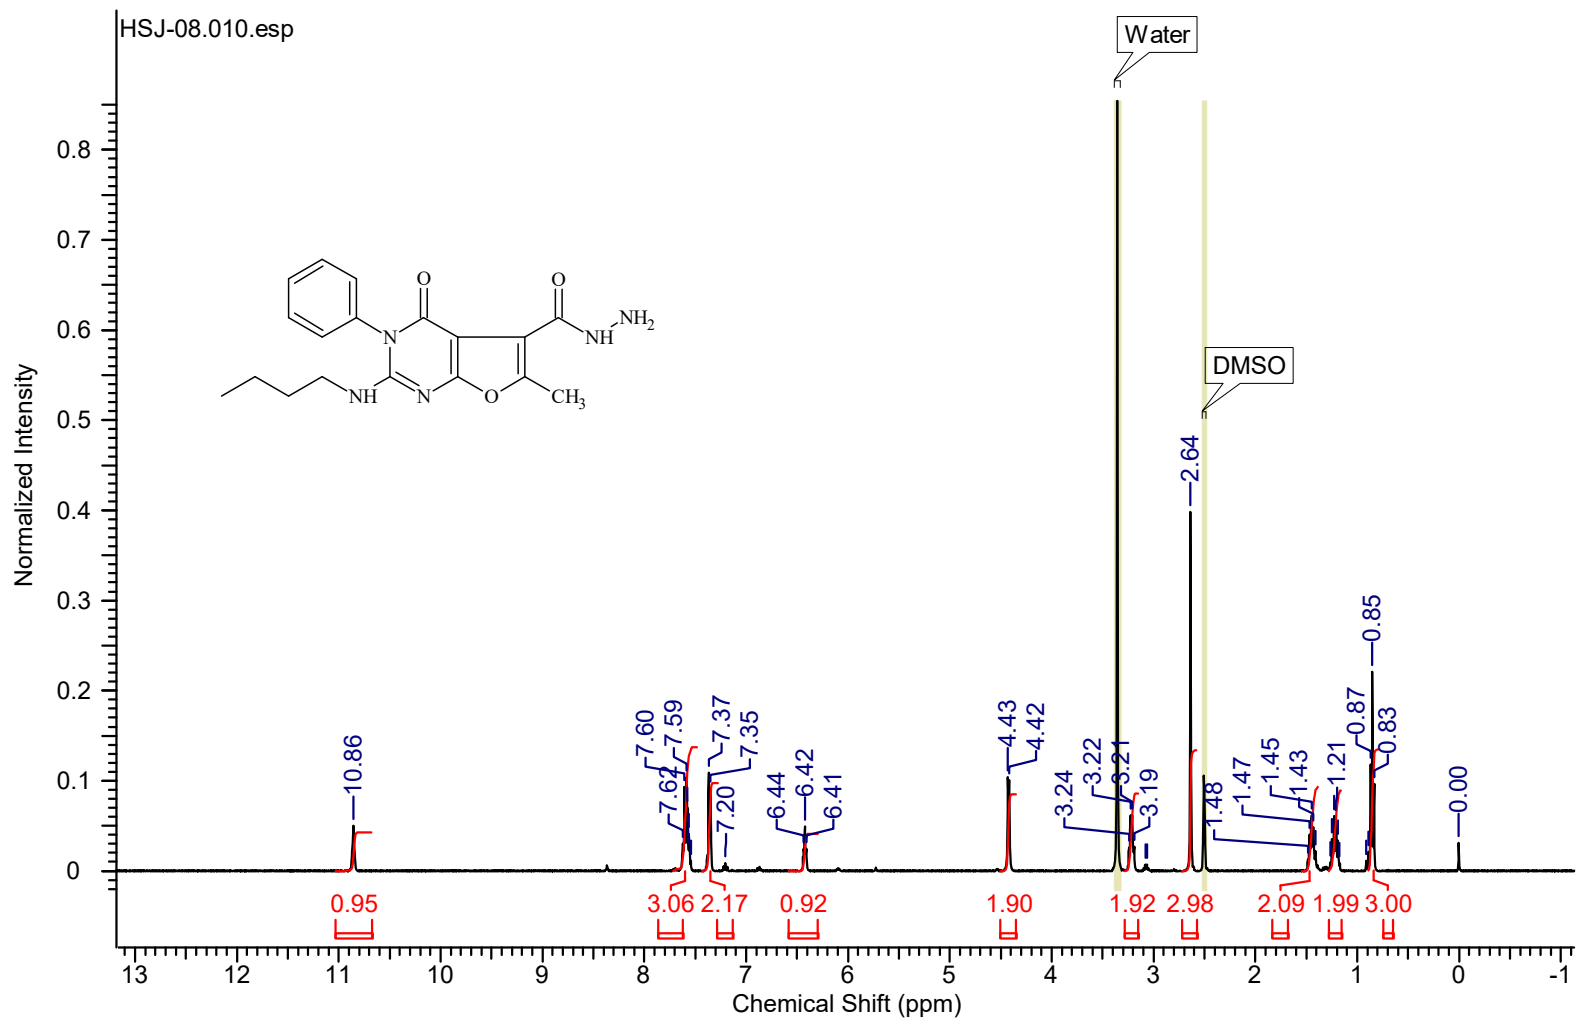

Fig.S7: <sup>1</sup>H NMR spectrum of compound **6g**

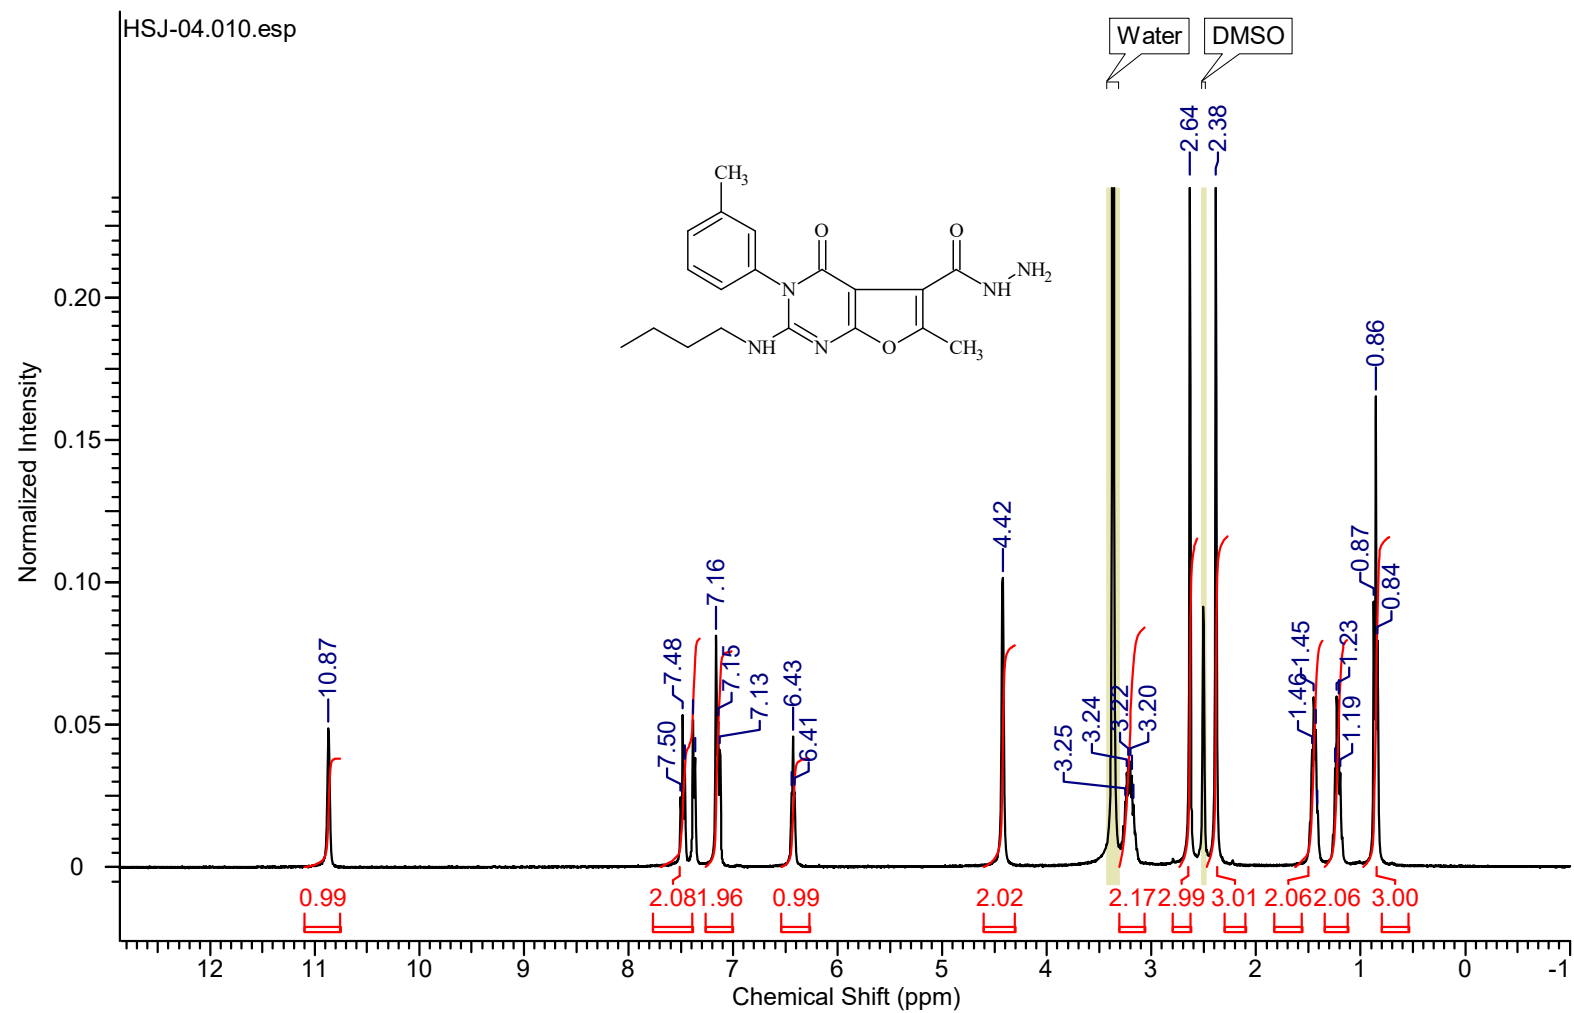

**Fig.S8:** <sup>1</sup>H NMR spectrum of compound **6h**

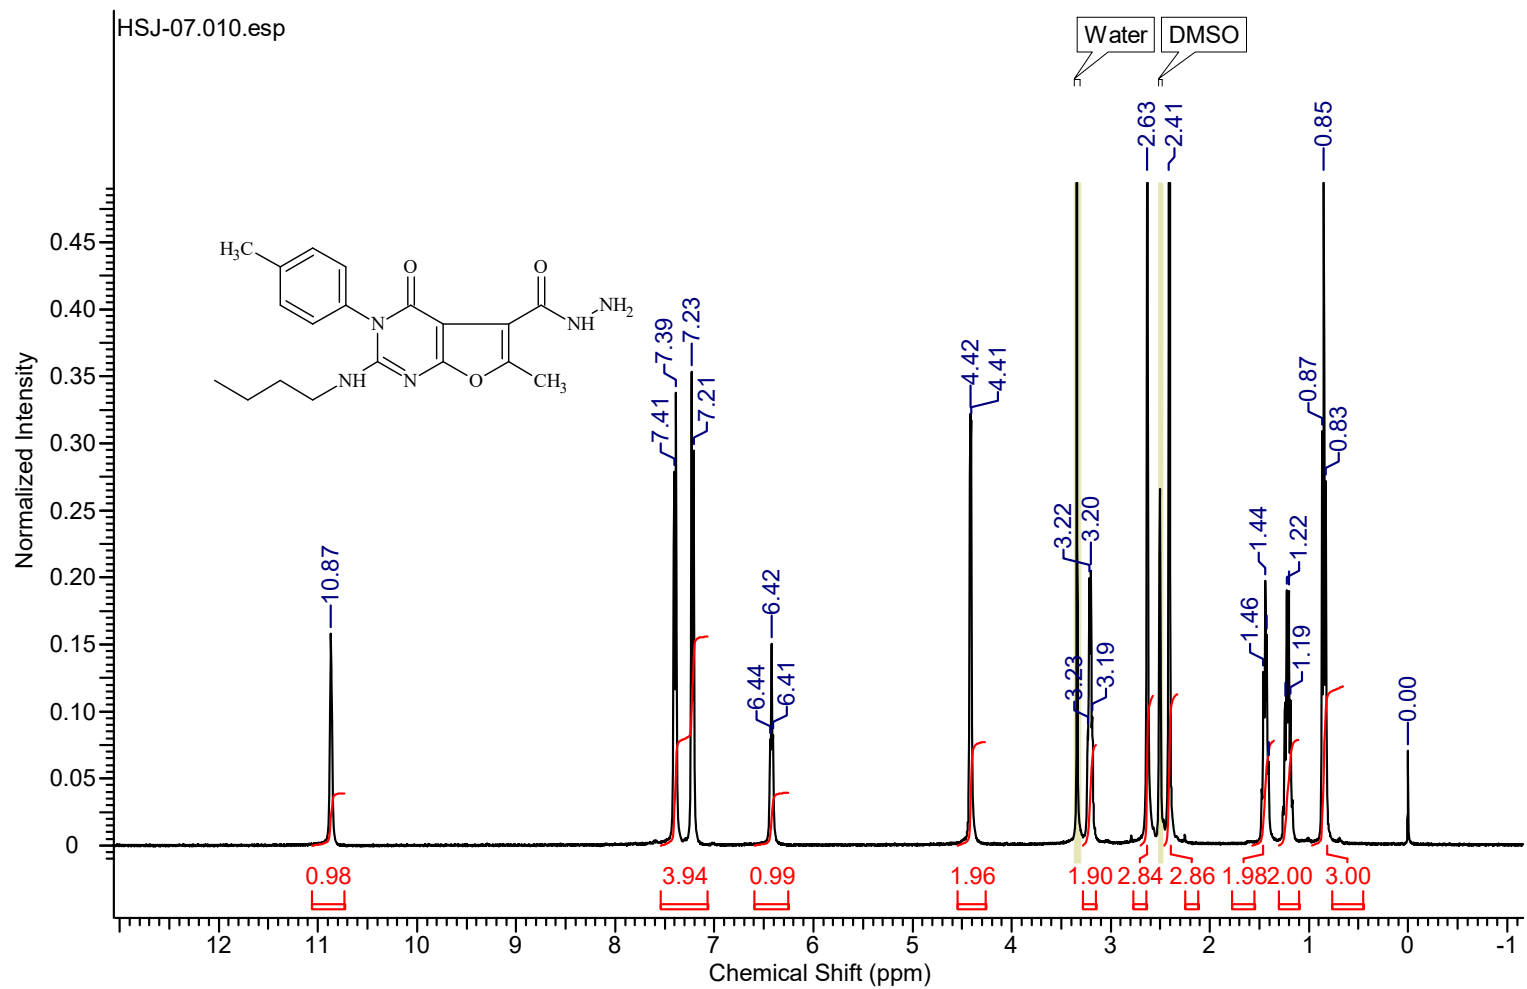

Fig.S9: <sup>1</sup>H NMR spectrum of compound 6i

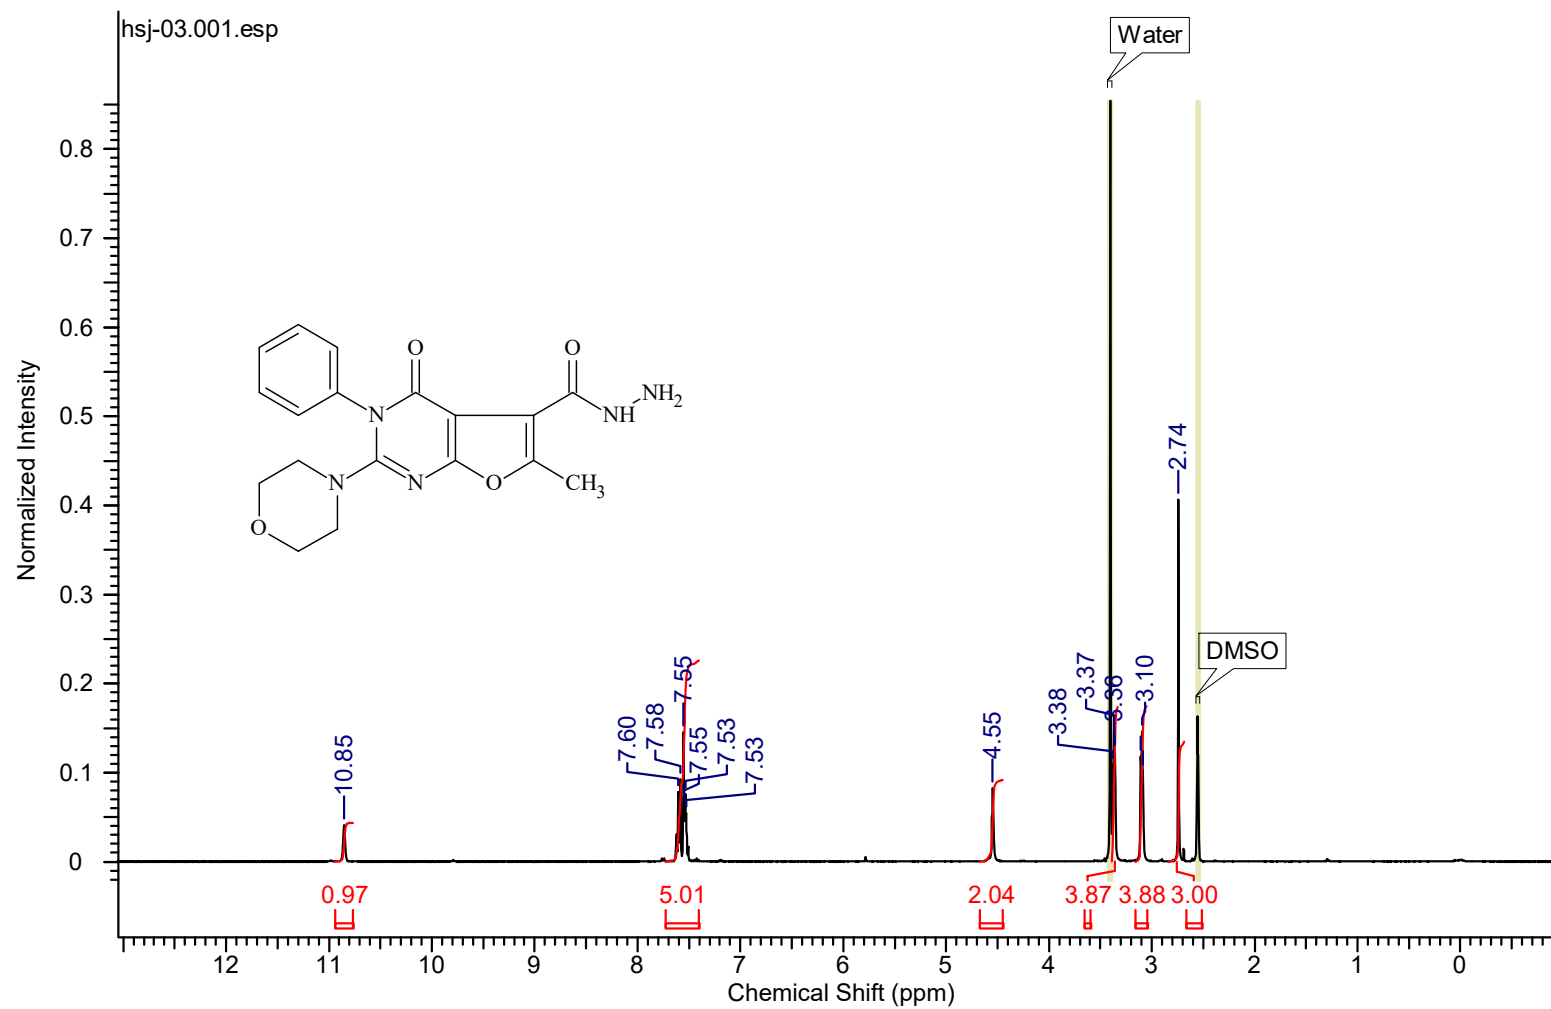

**Fig.S10:**  $^1\text{H}$  NMR spectrum of compound **6j**

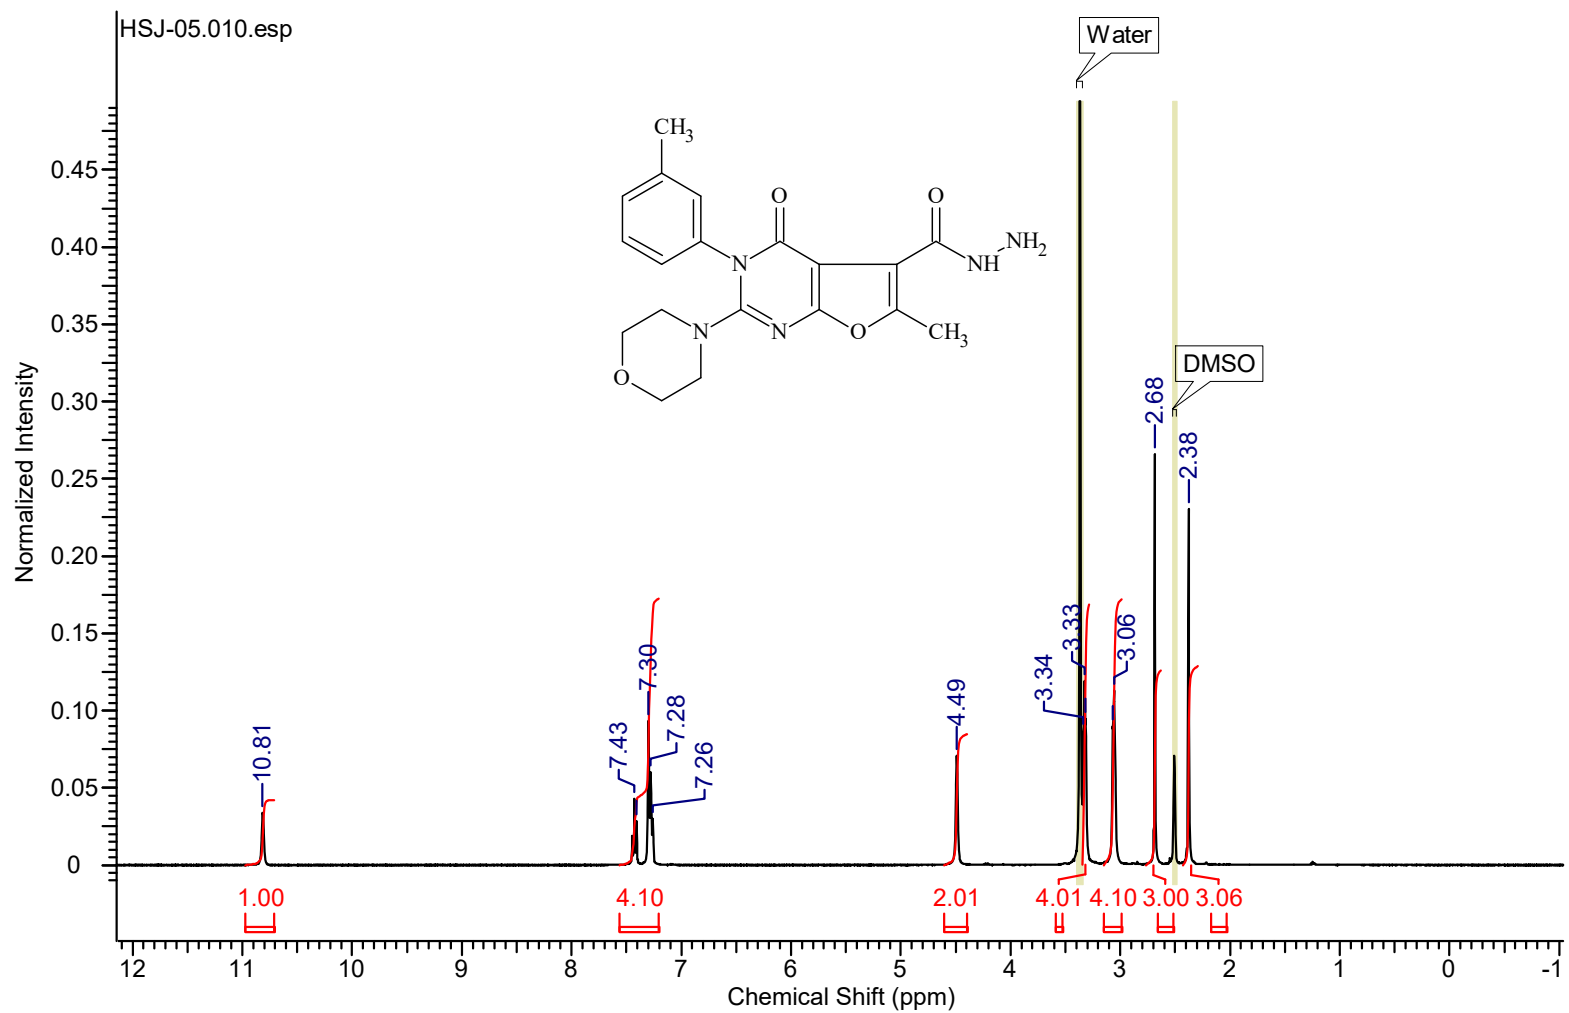

Fig.S11:  $^1\text{H}$  NMR spectrum of compound **6k**

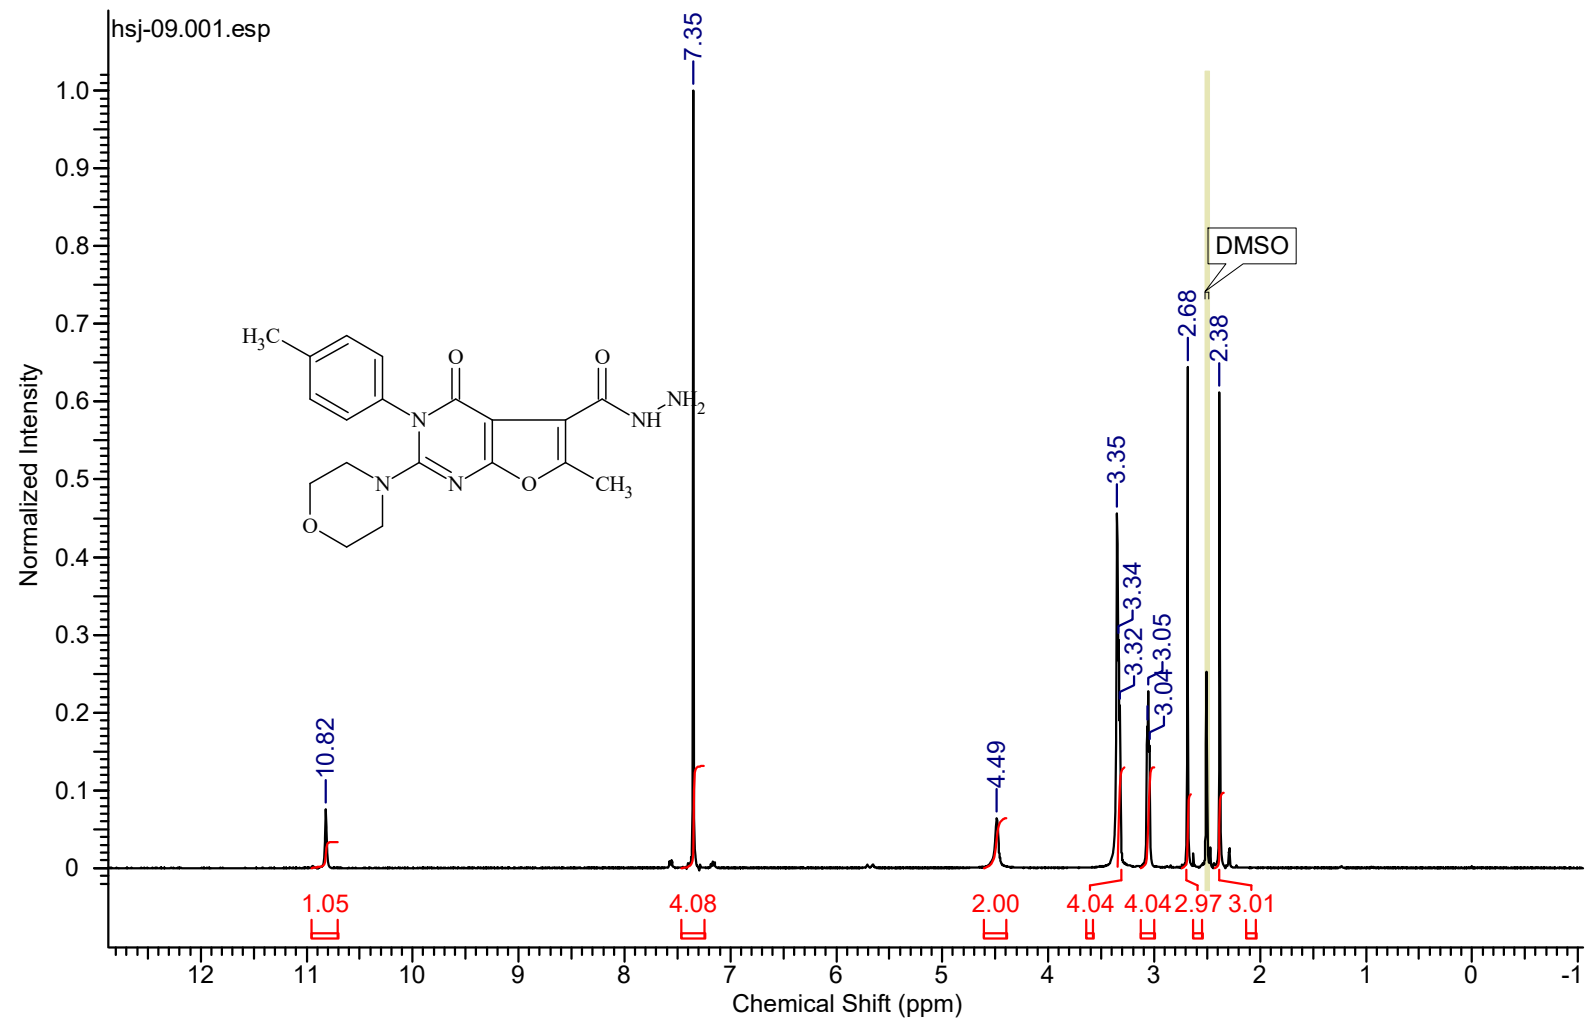

**Fig.S12:**  $^1\text{H}$  NMR spectrum of compound **6l**

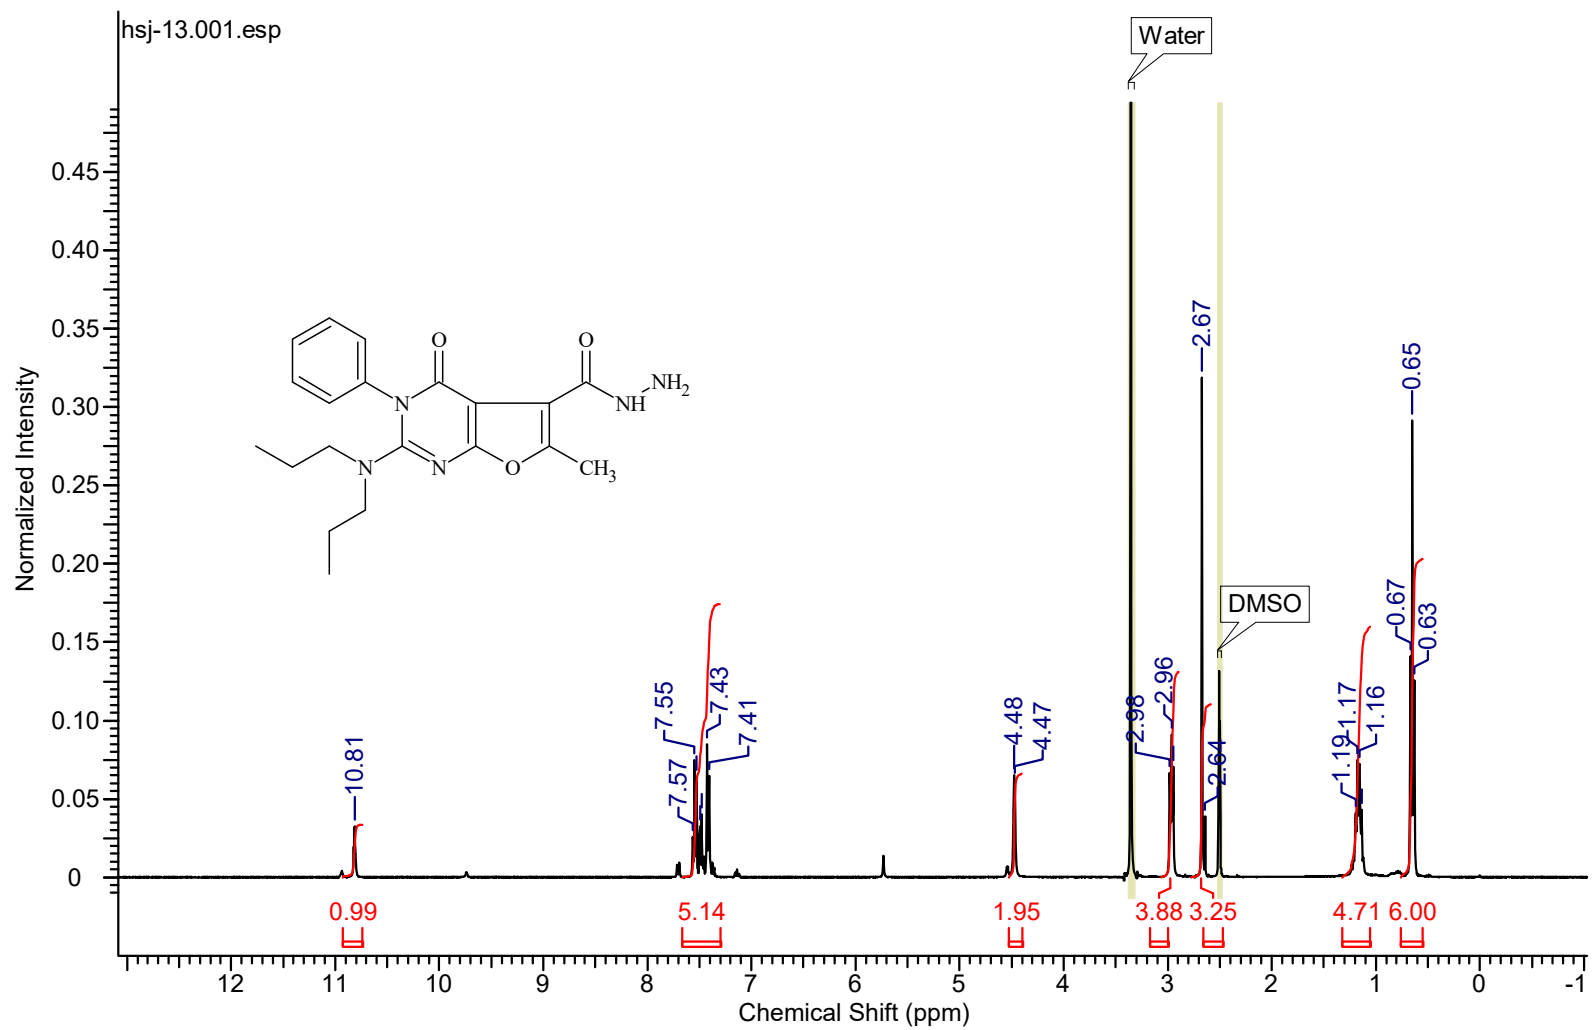

Fig.S13:  $^1\text{H}$  NMR spectrum of compound **6m**



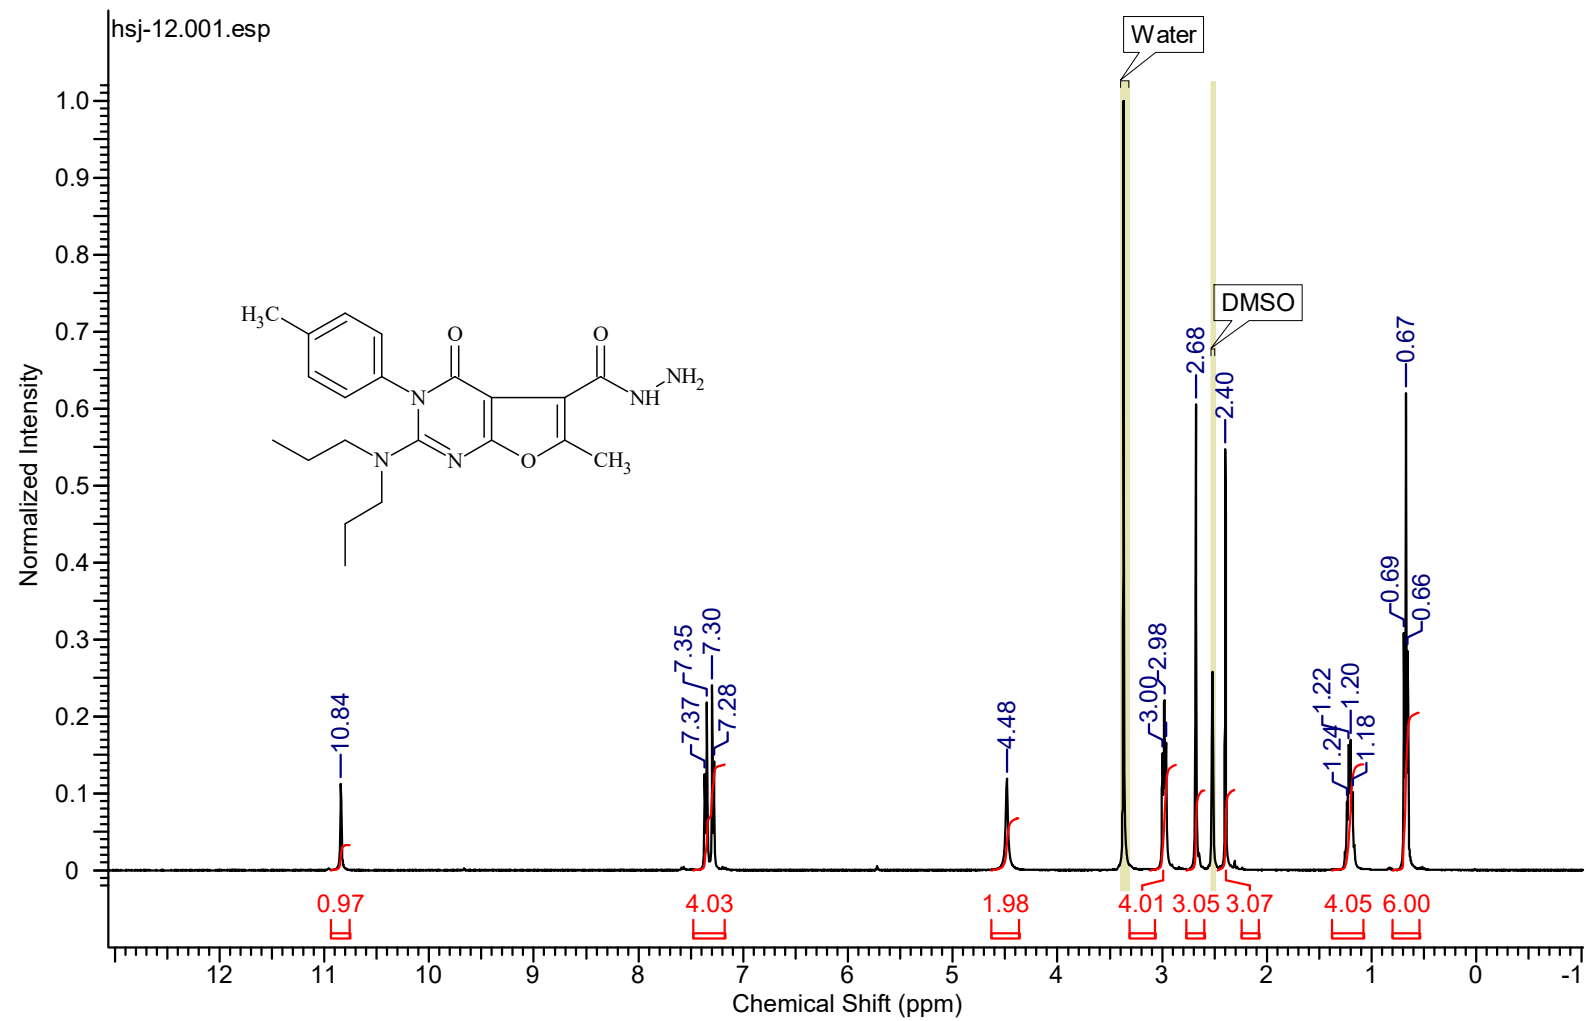

Fig.S14:  $^1\text{H}$  NMR spectrum of compound **6n**

**$^{13}\text{C}$  NMR of Compounds 6a-n  
(Fig. S15-28)**

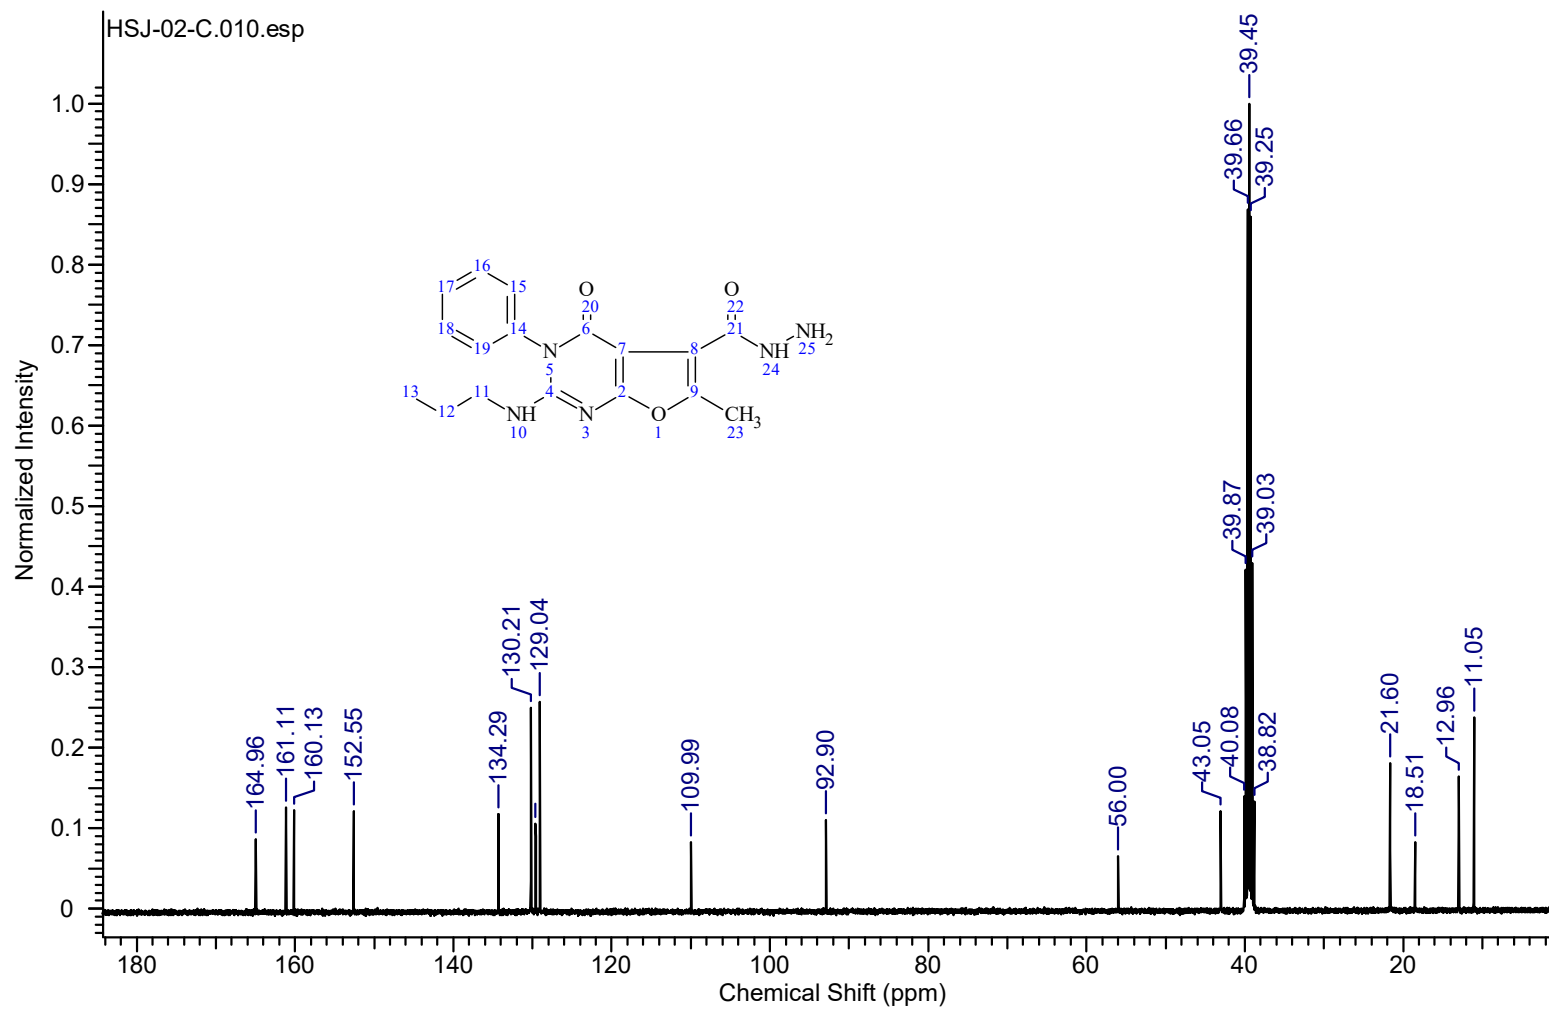

Fig.S15: <sup>13</sup>C NMR spectrum of compound 6a

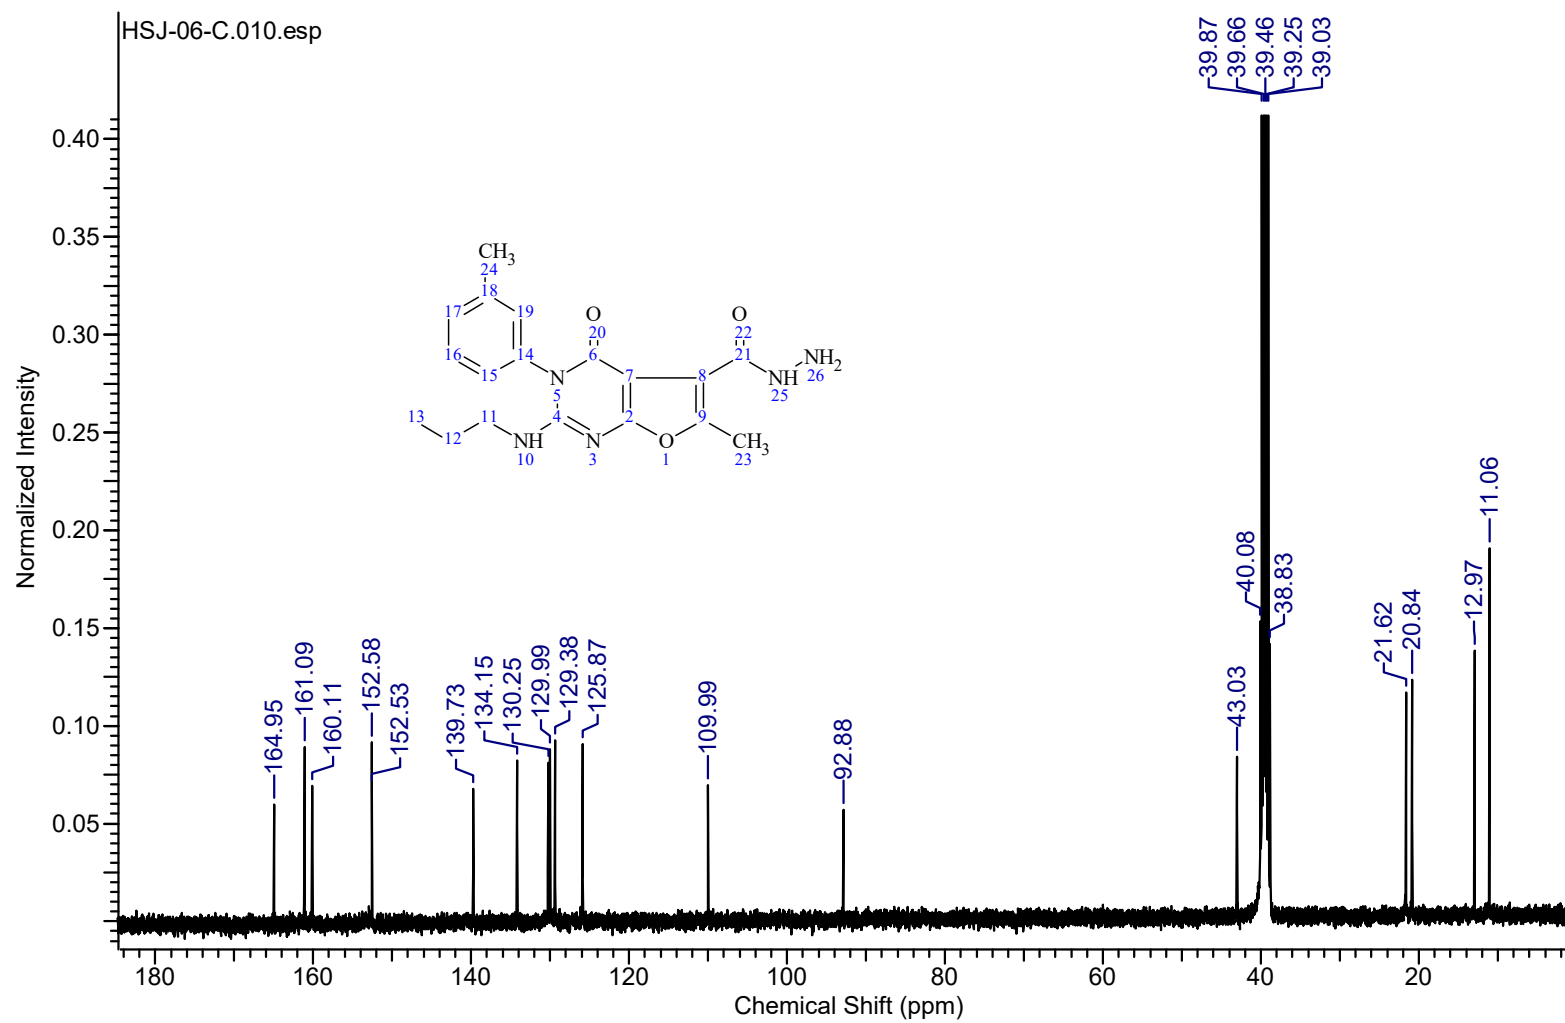

Fig.S16:  $^{13}\text{C}$  NMR spectrum of compound **6b**

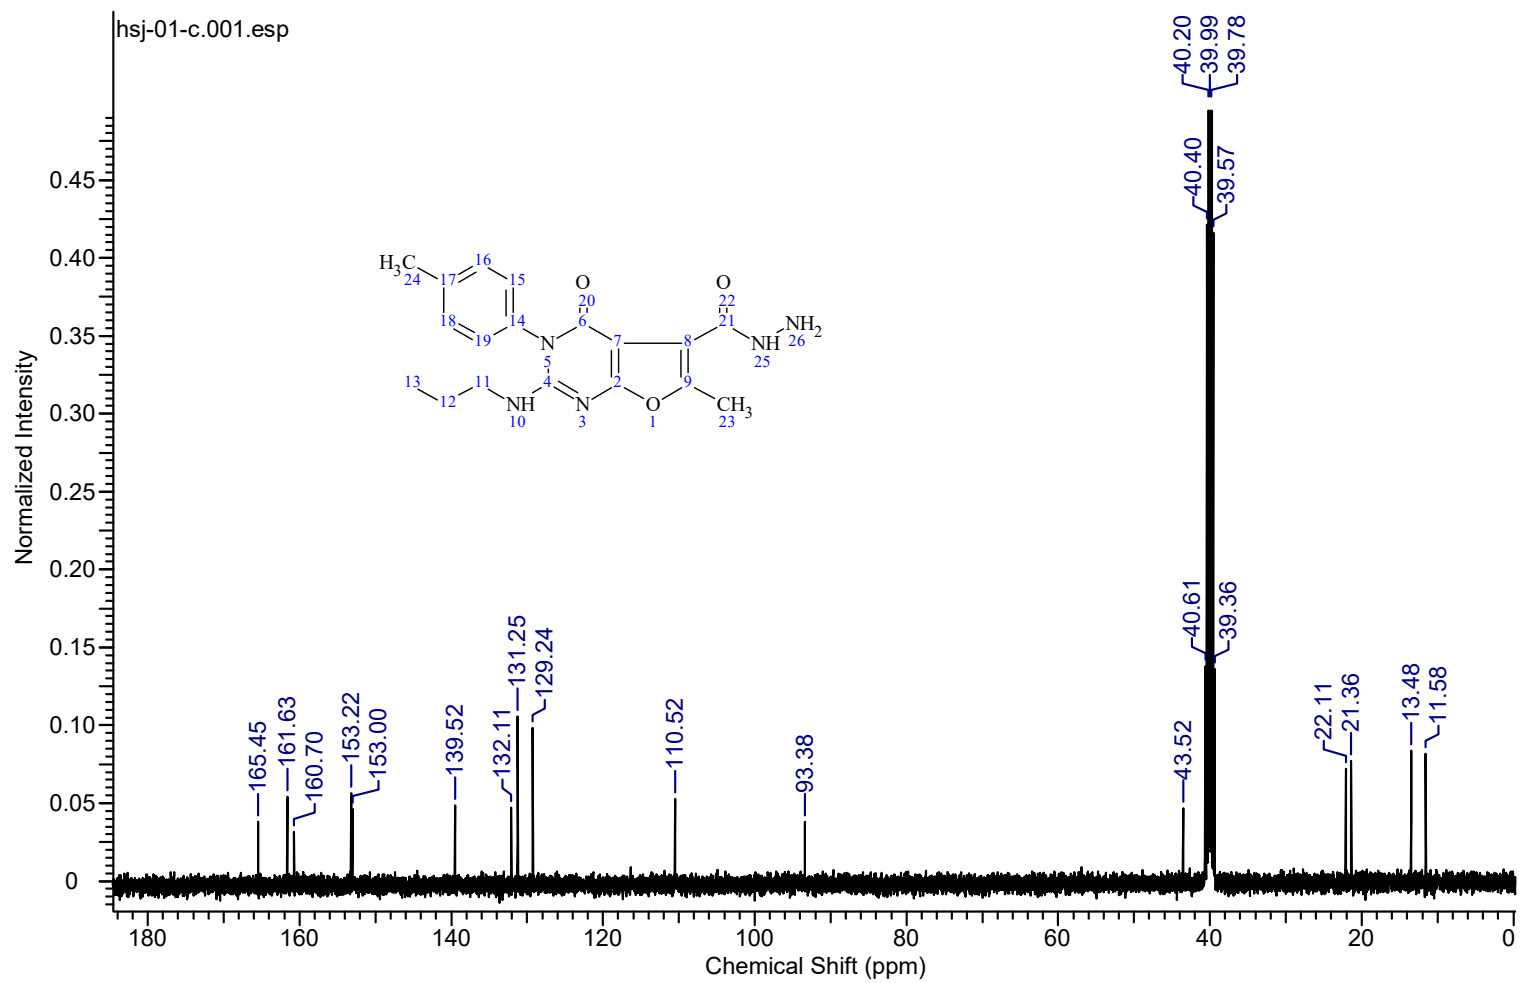

Fig.S17:  $^{13}\text{C}$  NMR spectrum of compound **6c**

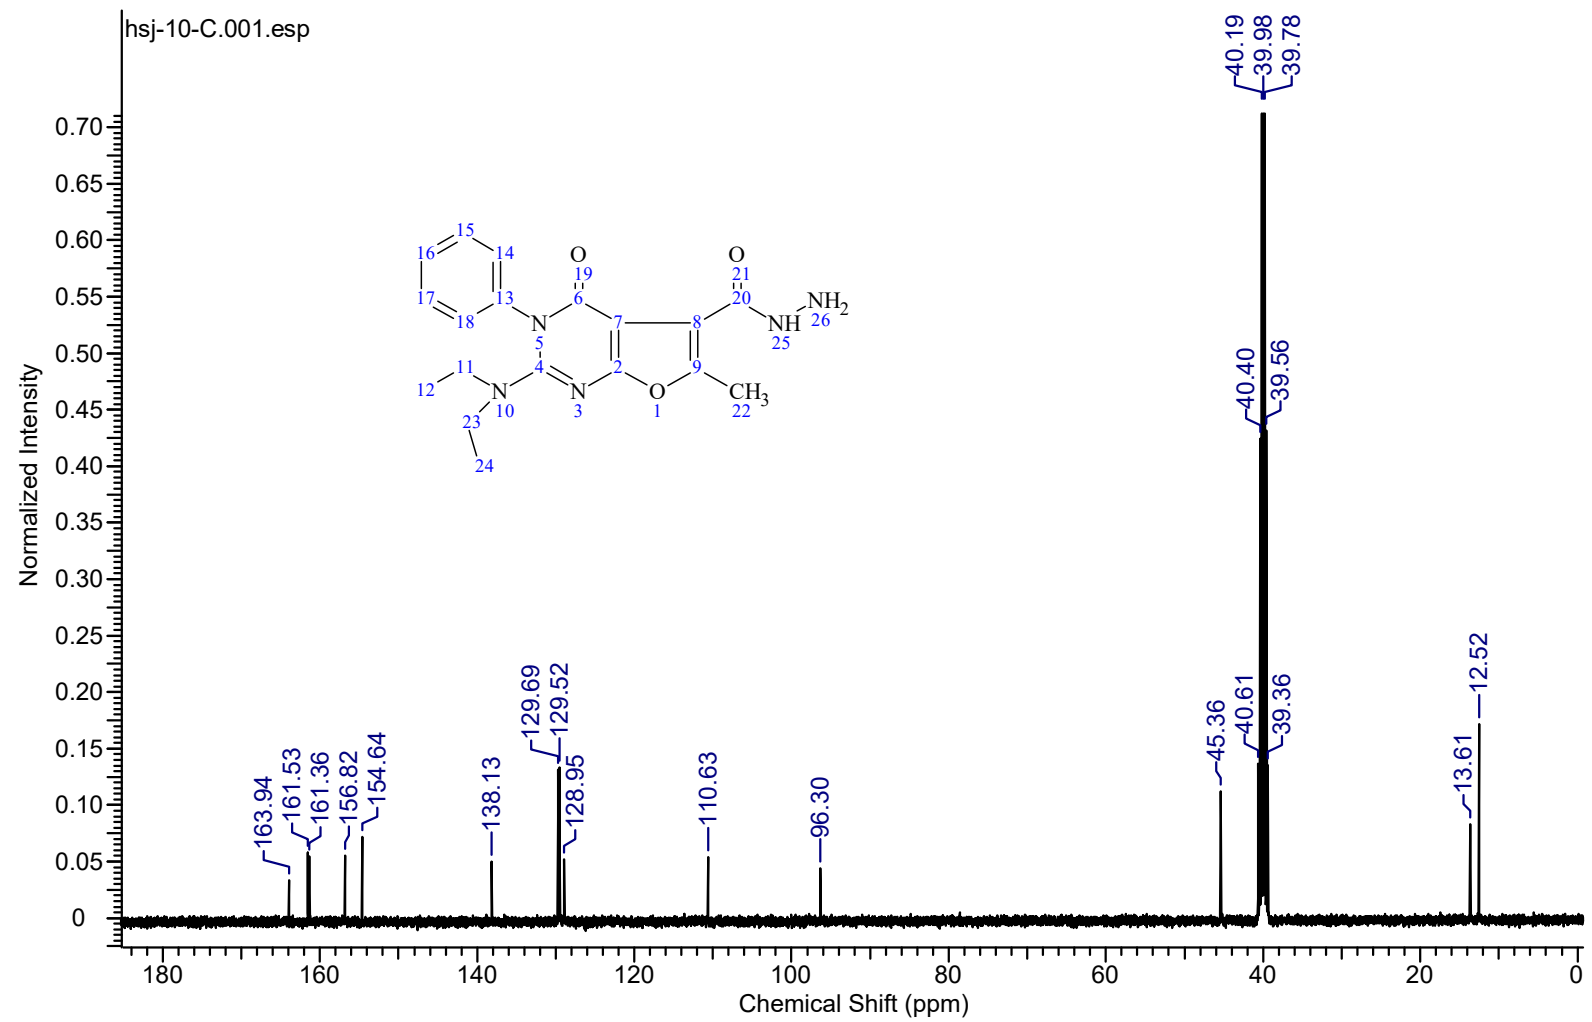

Fig.S18: <sup>13</sup>C NMR spectrum of compound 6d

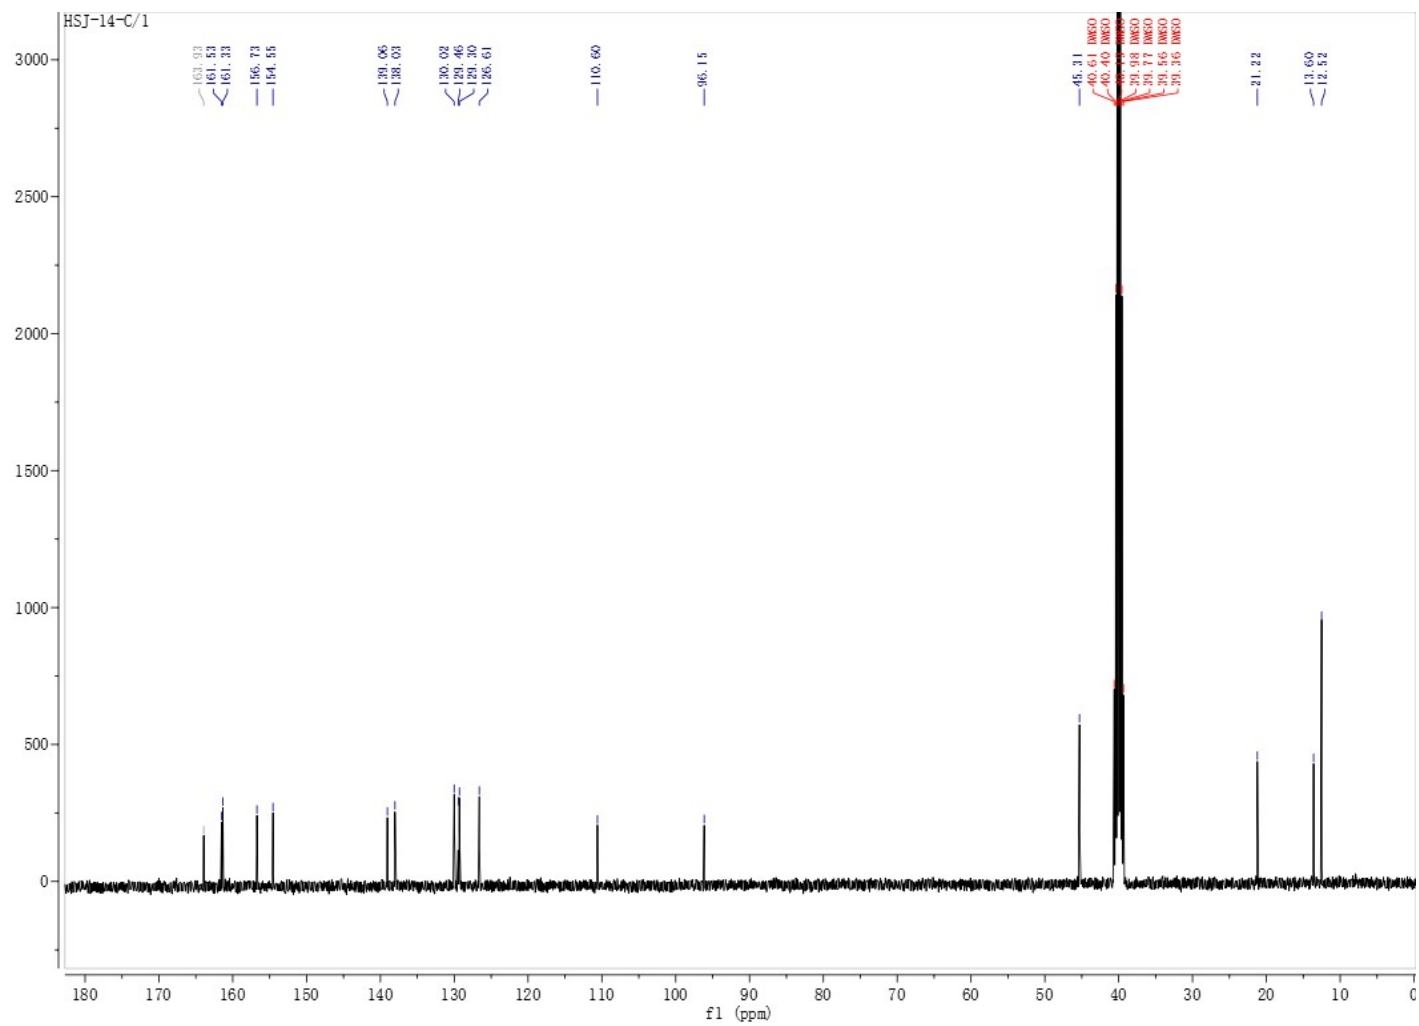

Fig.S19:  $^{13}\text{C}$  NMR spectrum of compound **6e**

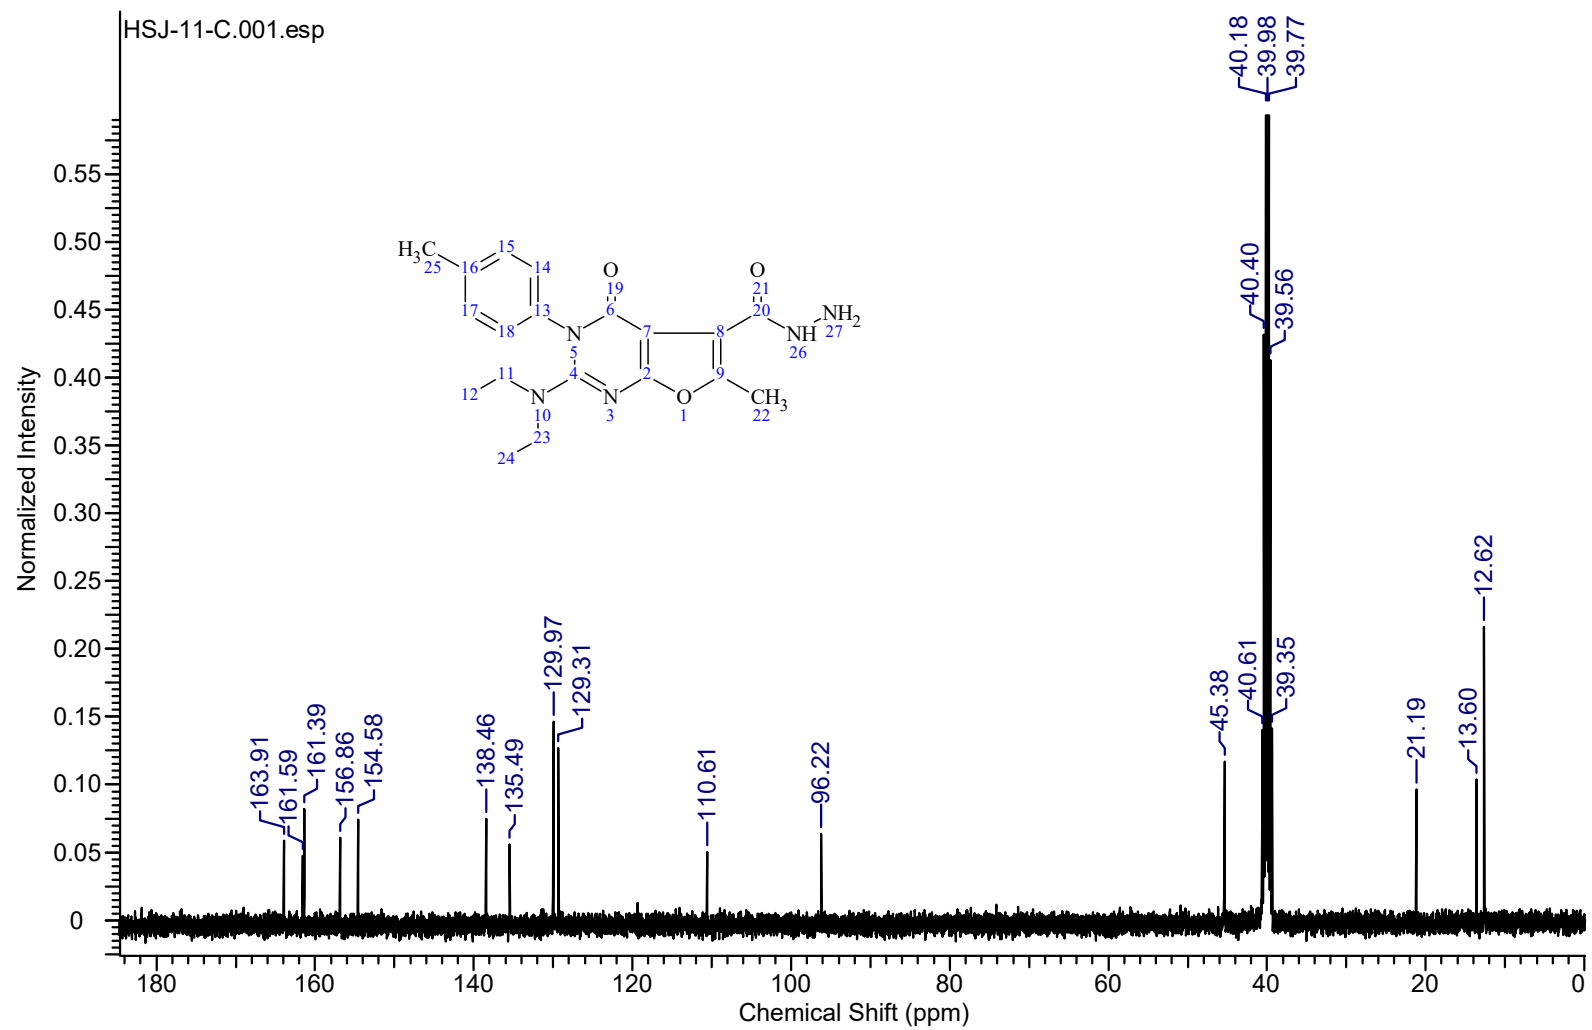

Fig.S20:  $^{13}\text{C}$  NMR spectrum of compound 6f



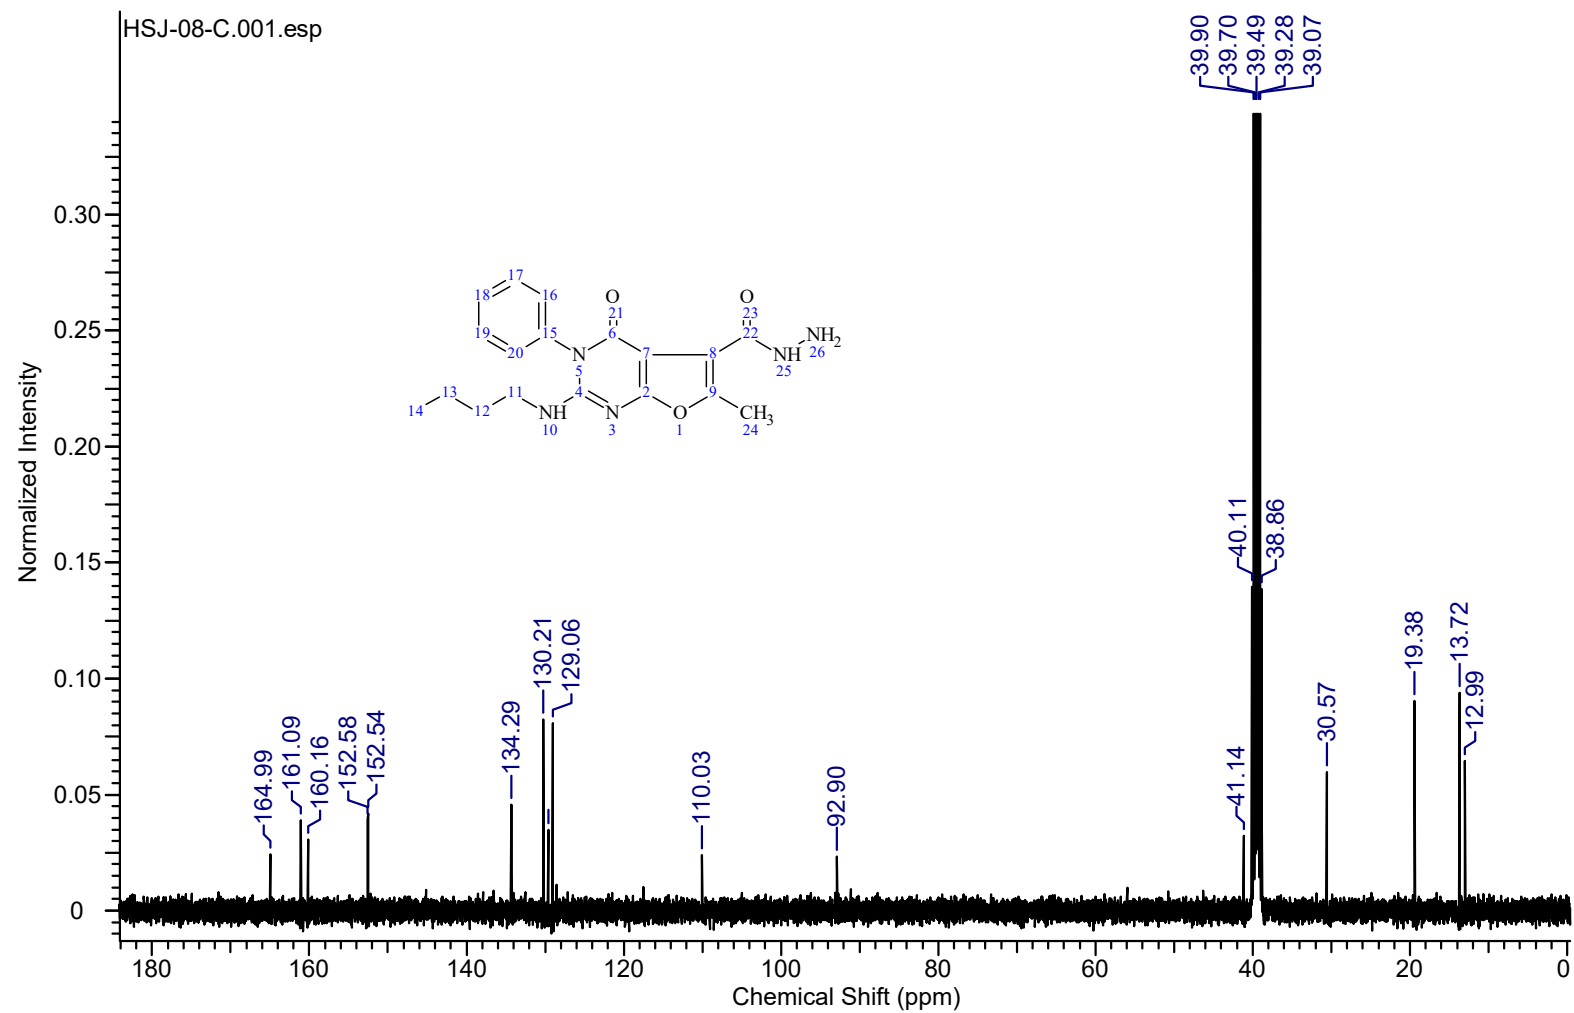

Fig.S21:  $^{13}\text{C}$  NMR spectrum of compound 6g

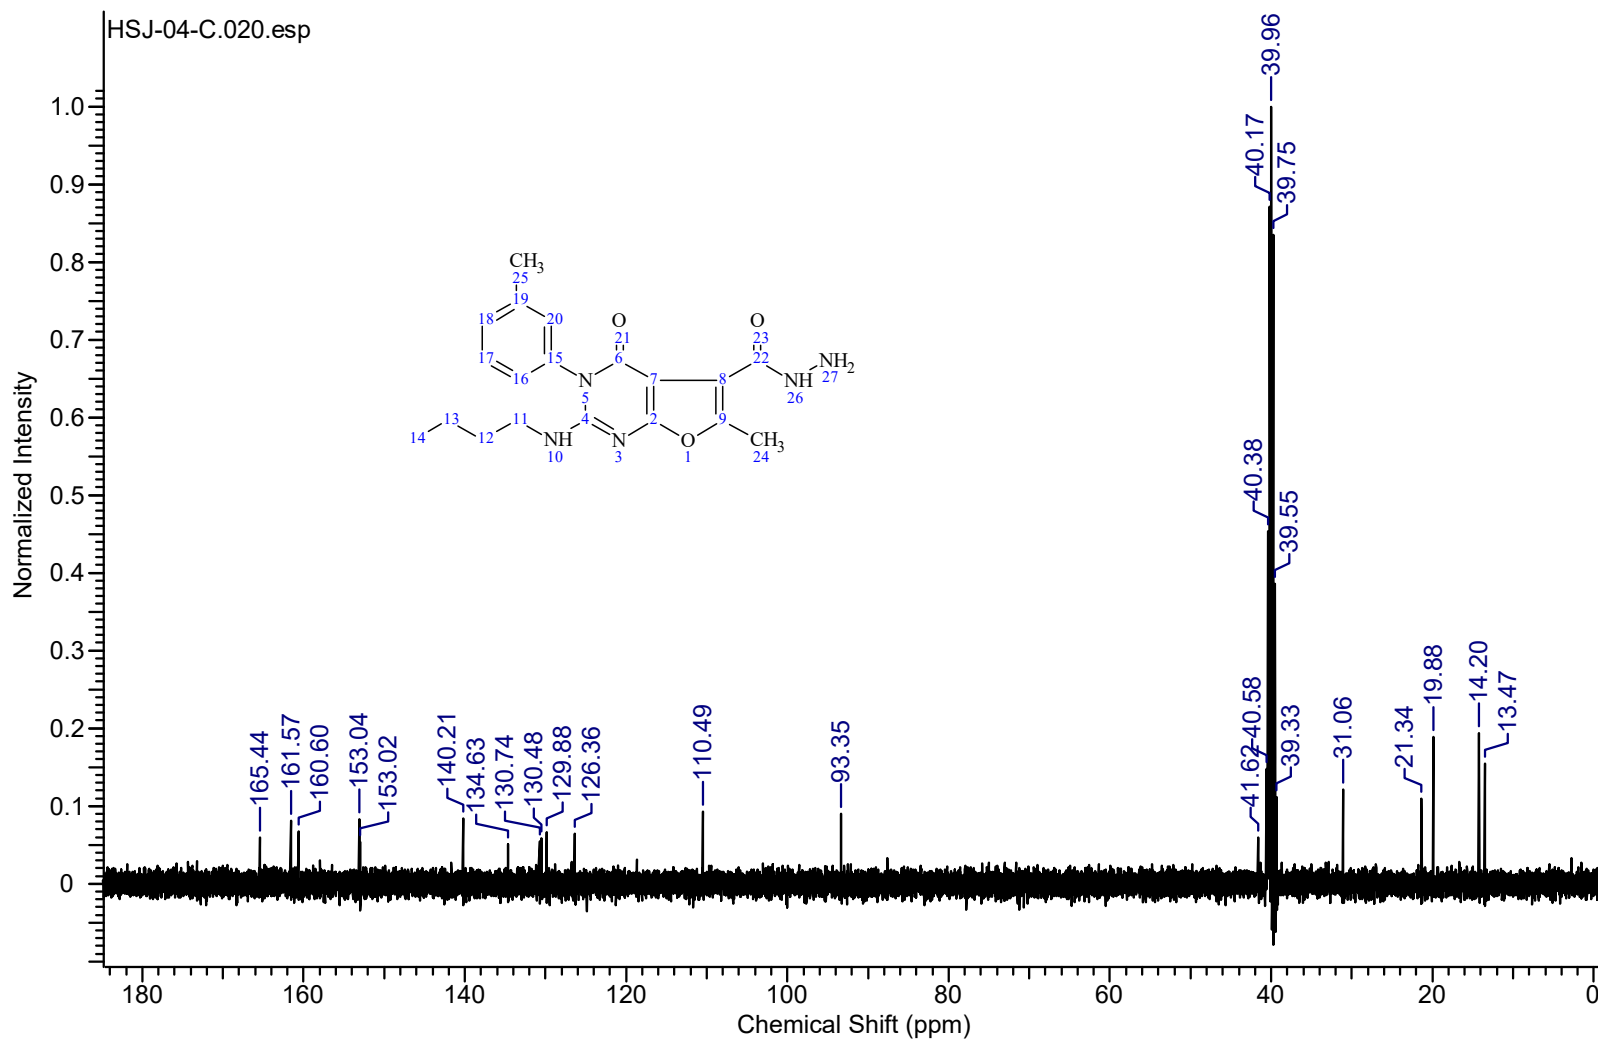

Fig.S22:  $^{13}\text{C}$  NMR spectrum of compound 6h

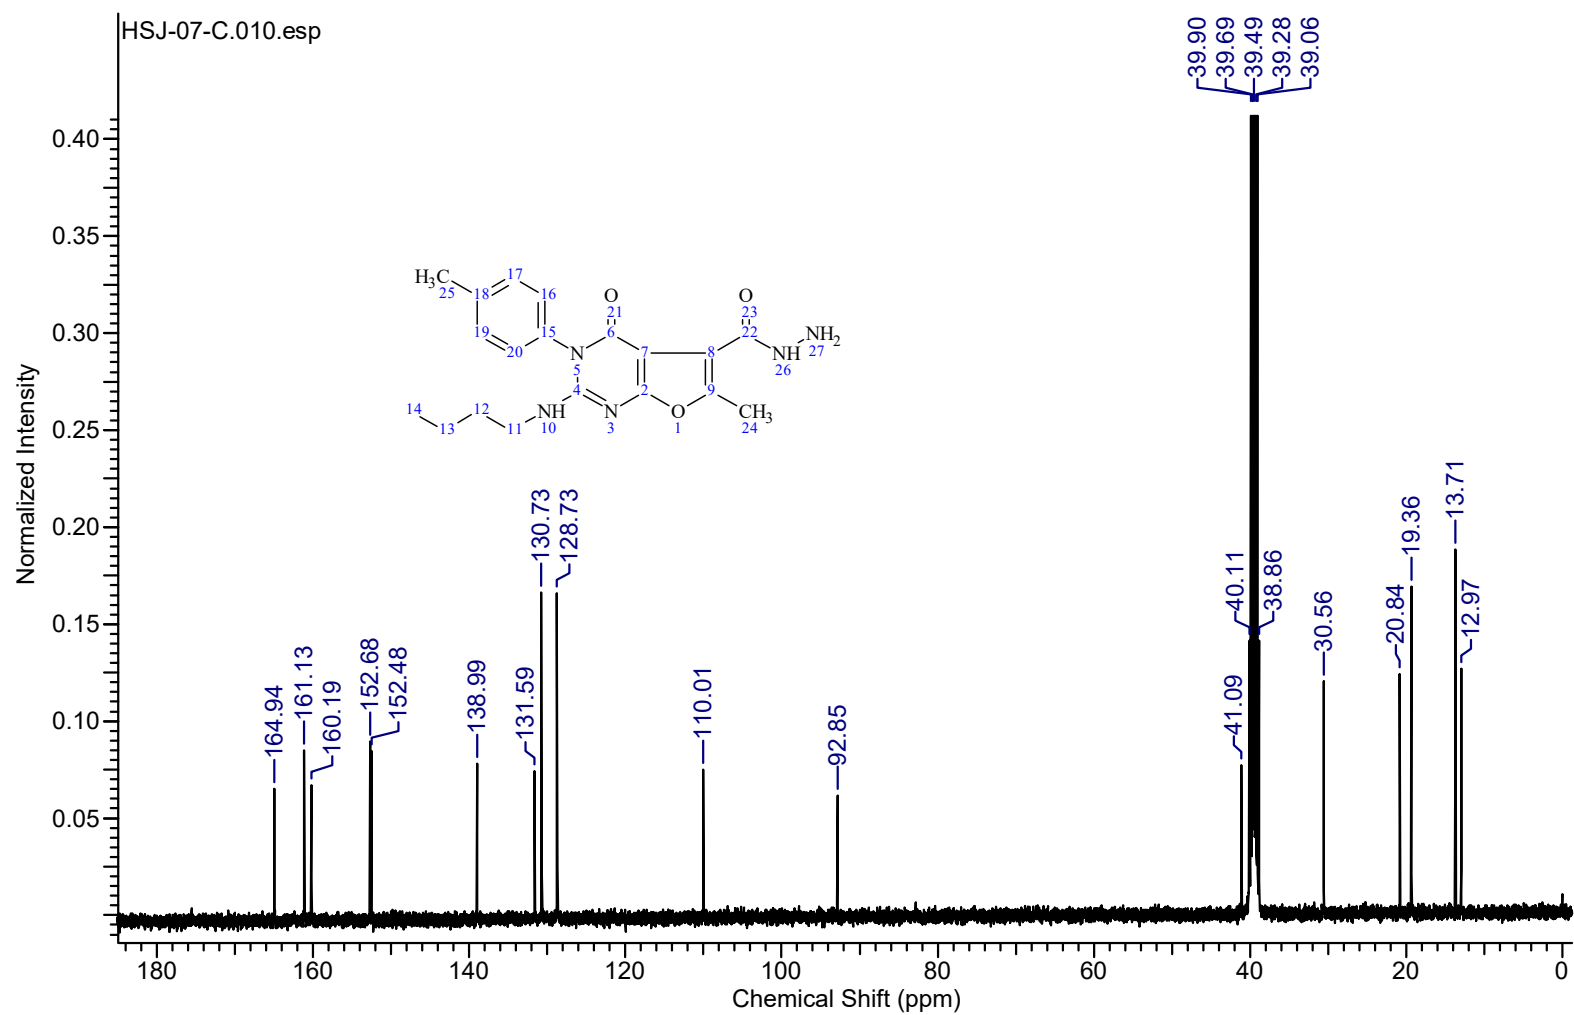

Fig.S23:  $^{13}\text{C}$  NMR spectrum of compound 6i

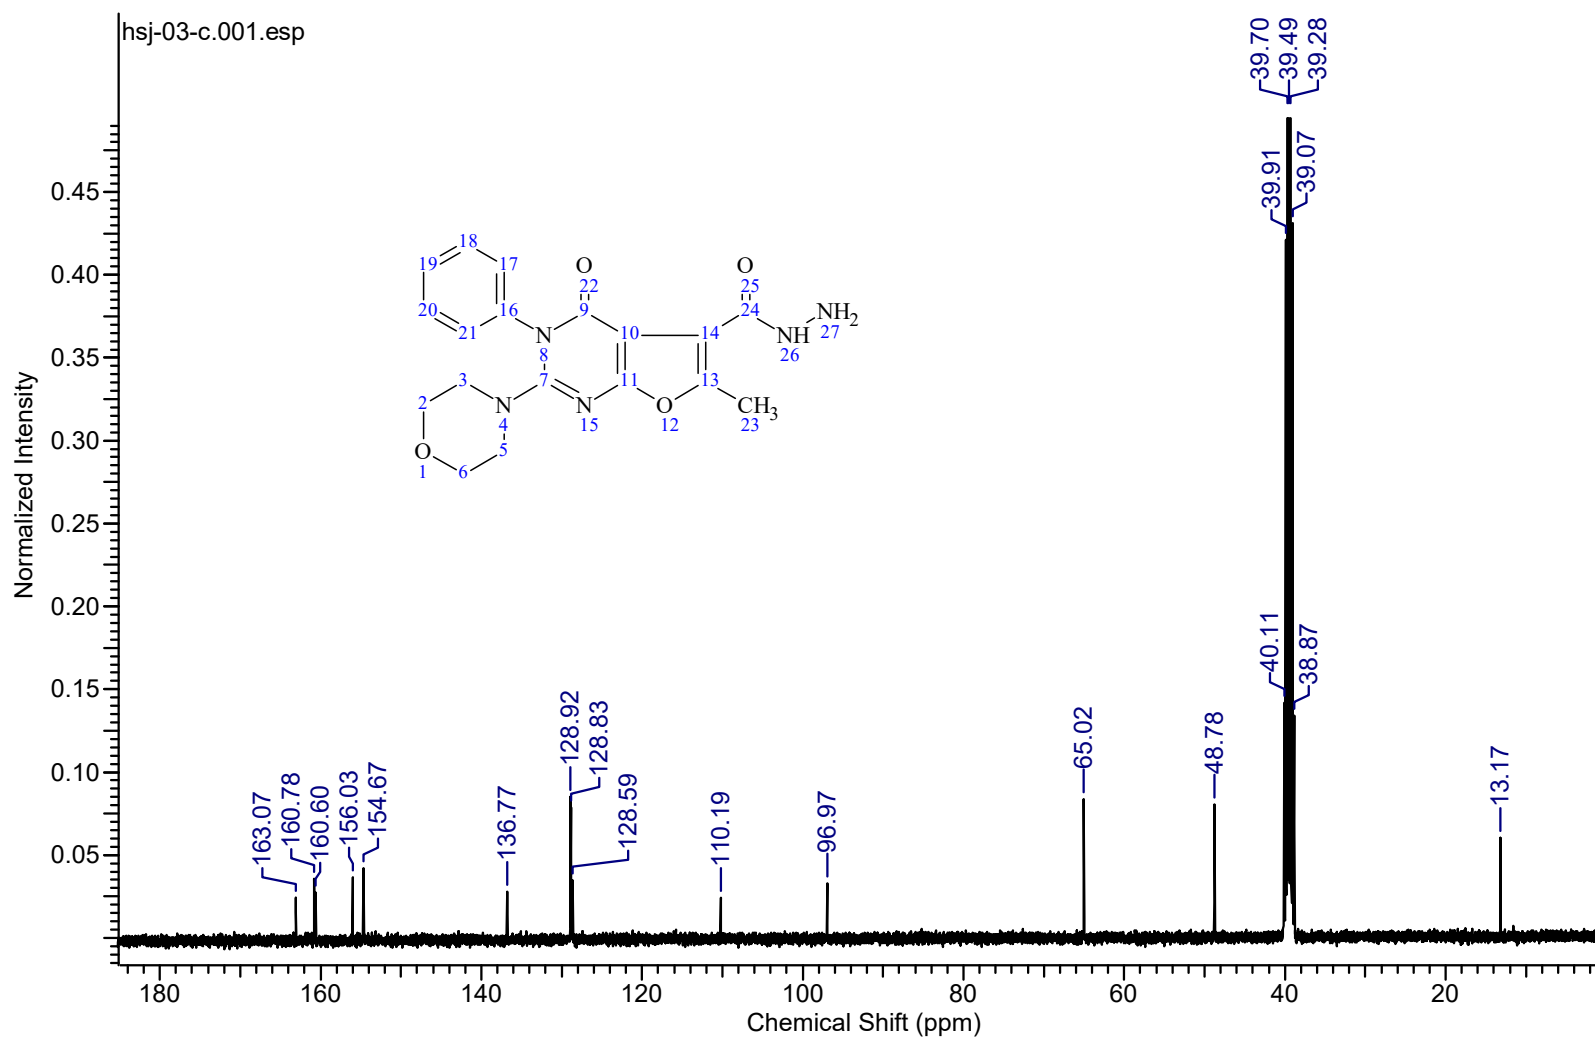

Fig.S24:  $^{13}\text{C}$  NMR spectrum of compound 6j

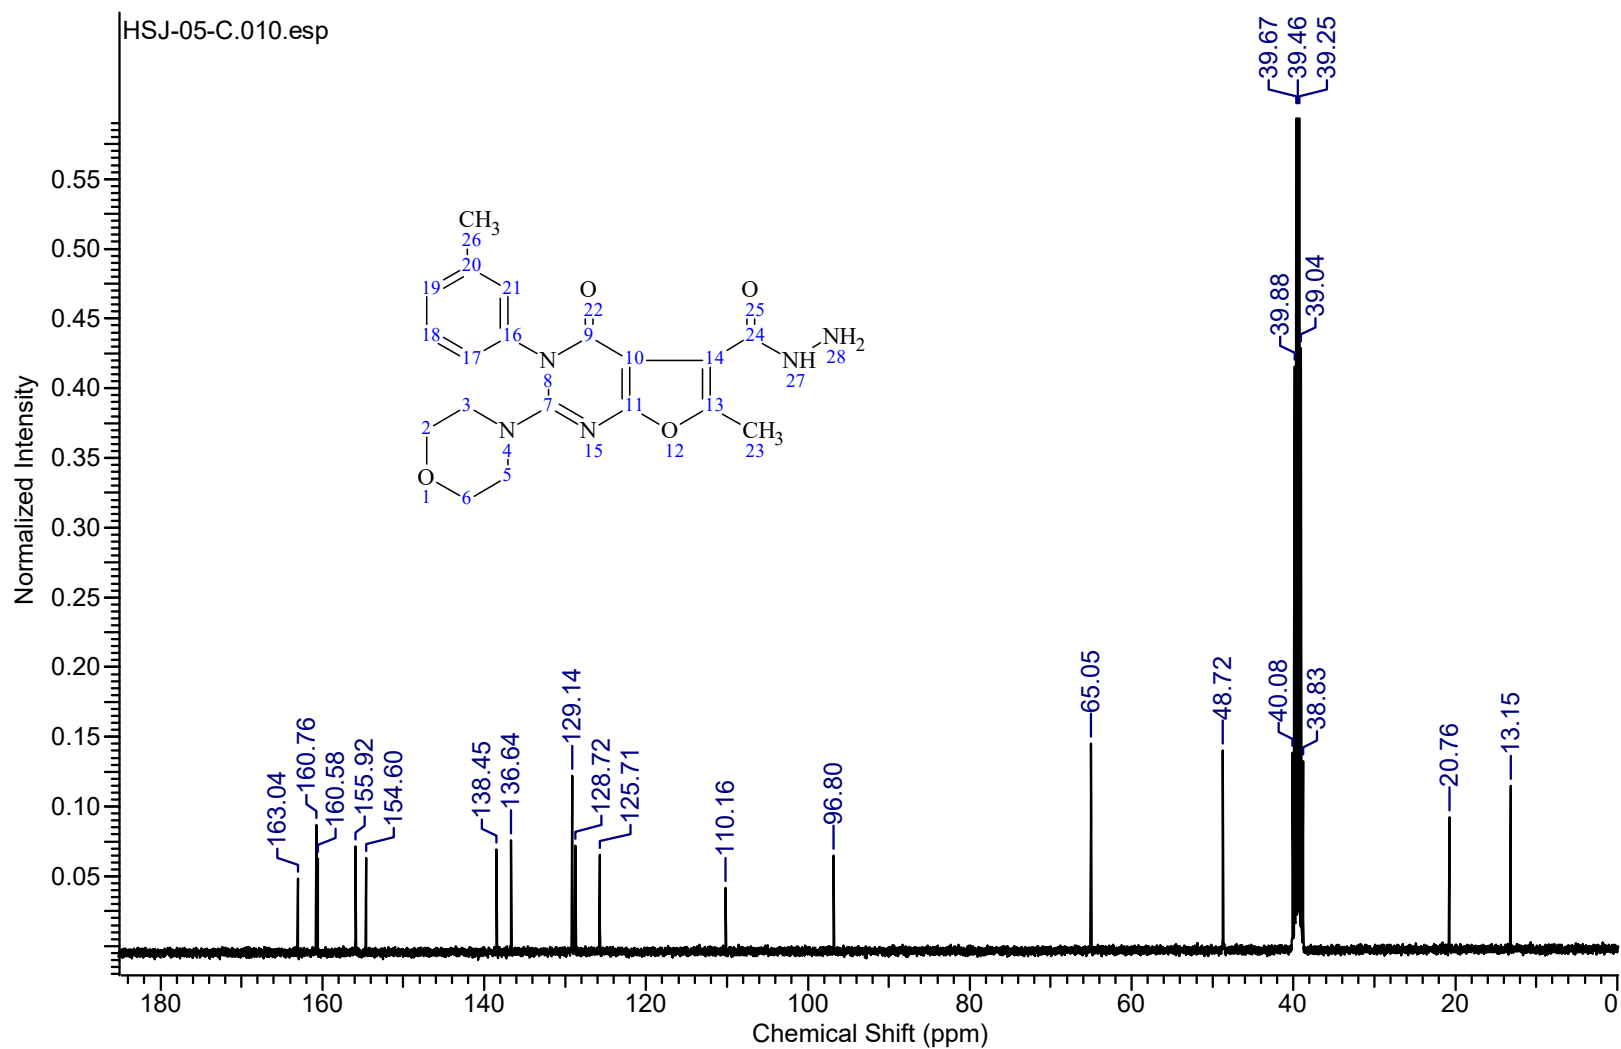

Fig.S25: <sup>13</sup>C NMR spectrum of compound 6k

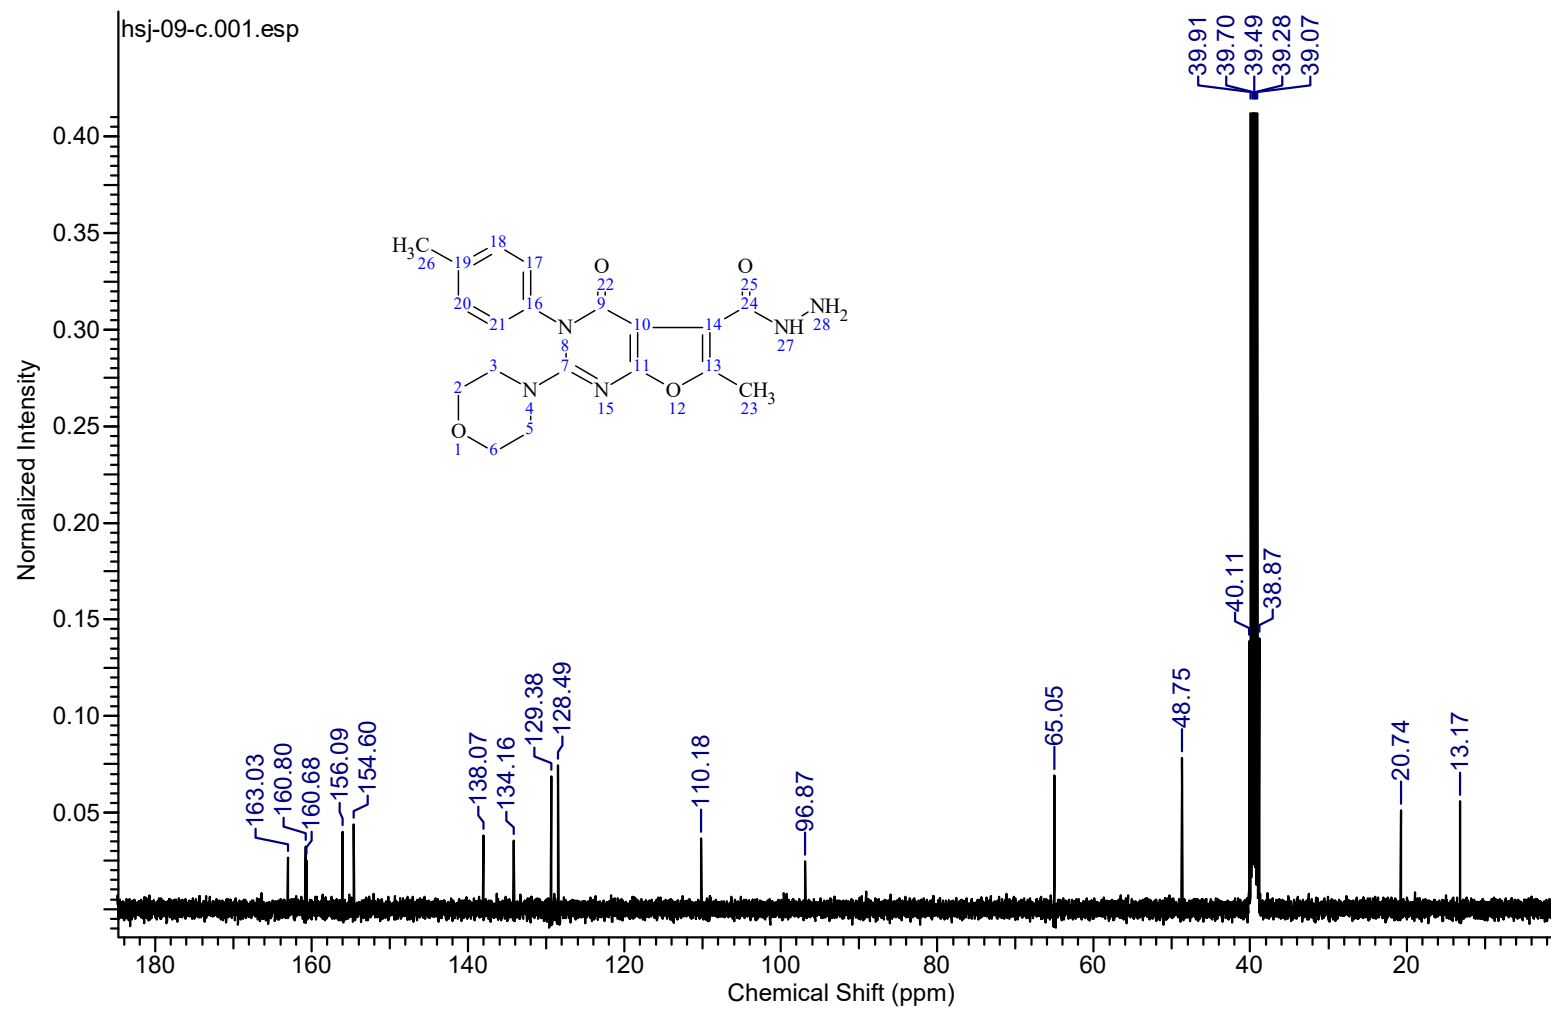

Fig.S26:  $^{13}\text{C}$  NMR spectrum of compound 61

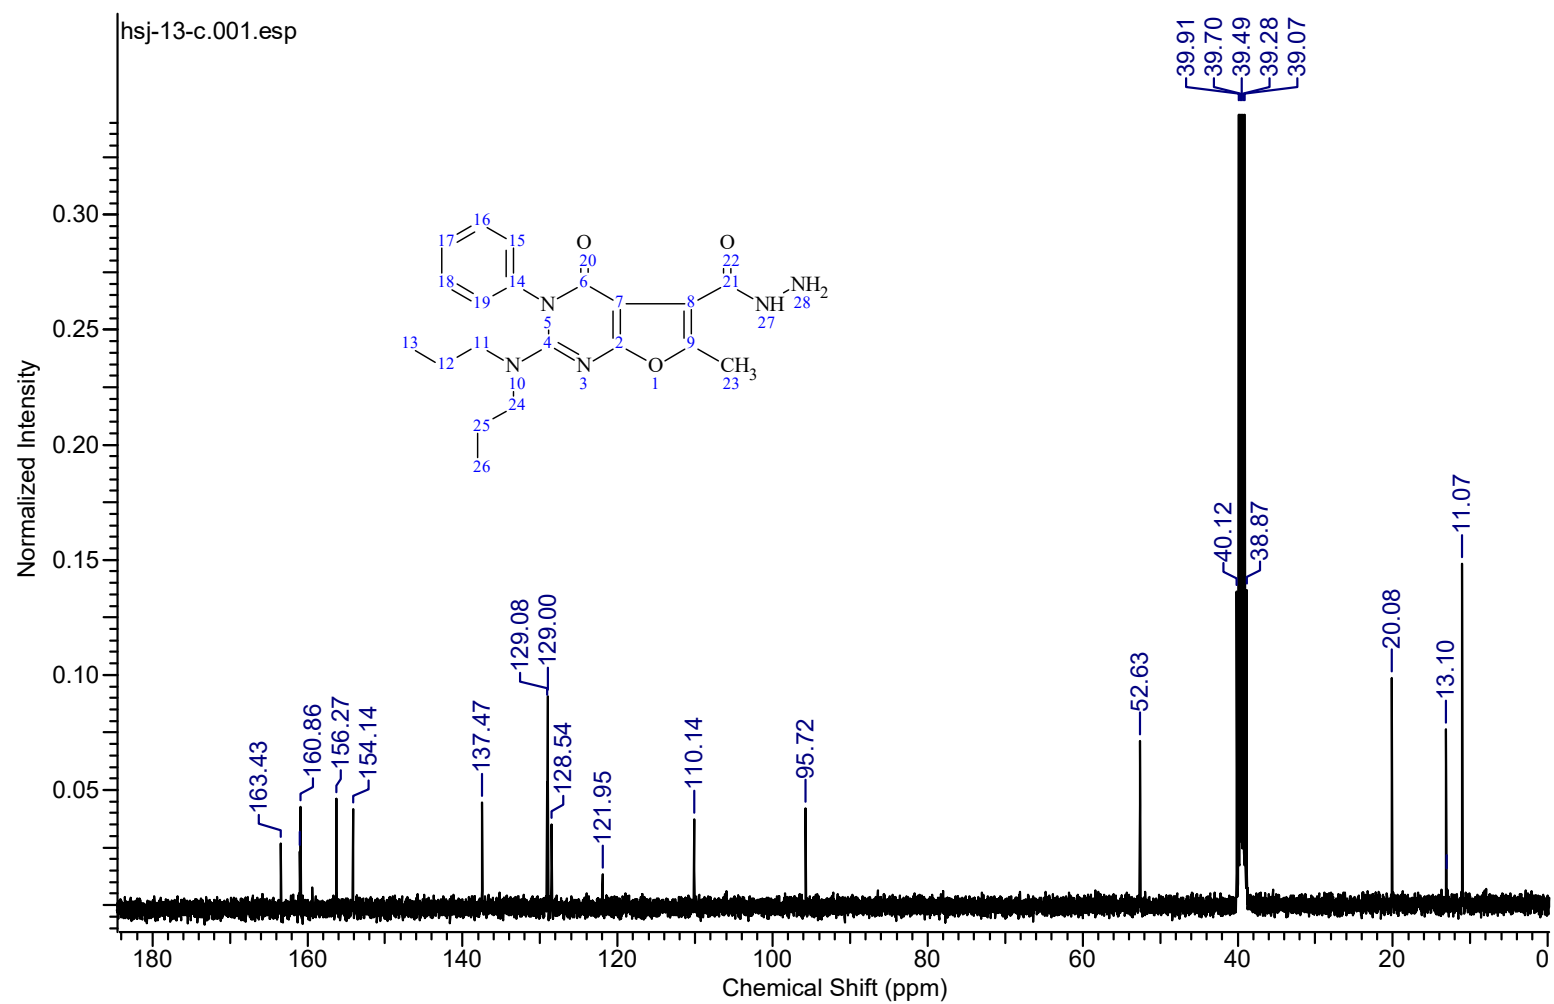

Fig.S27:  $^{13}\text{C}$  NMR spectrum of compound 6m

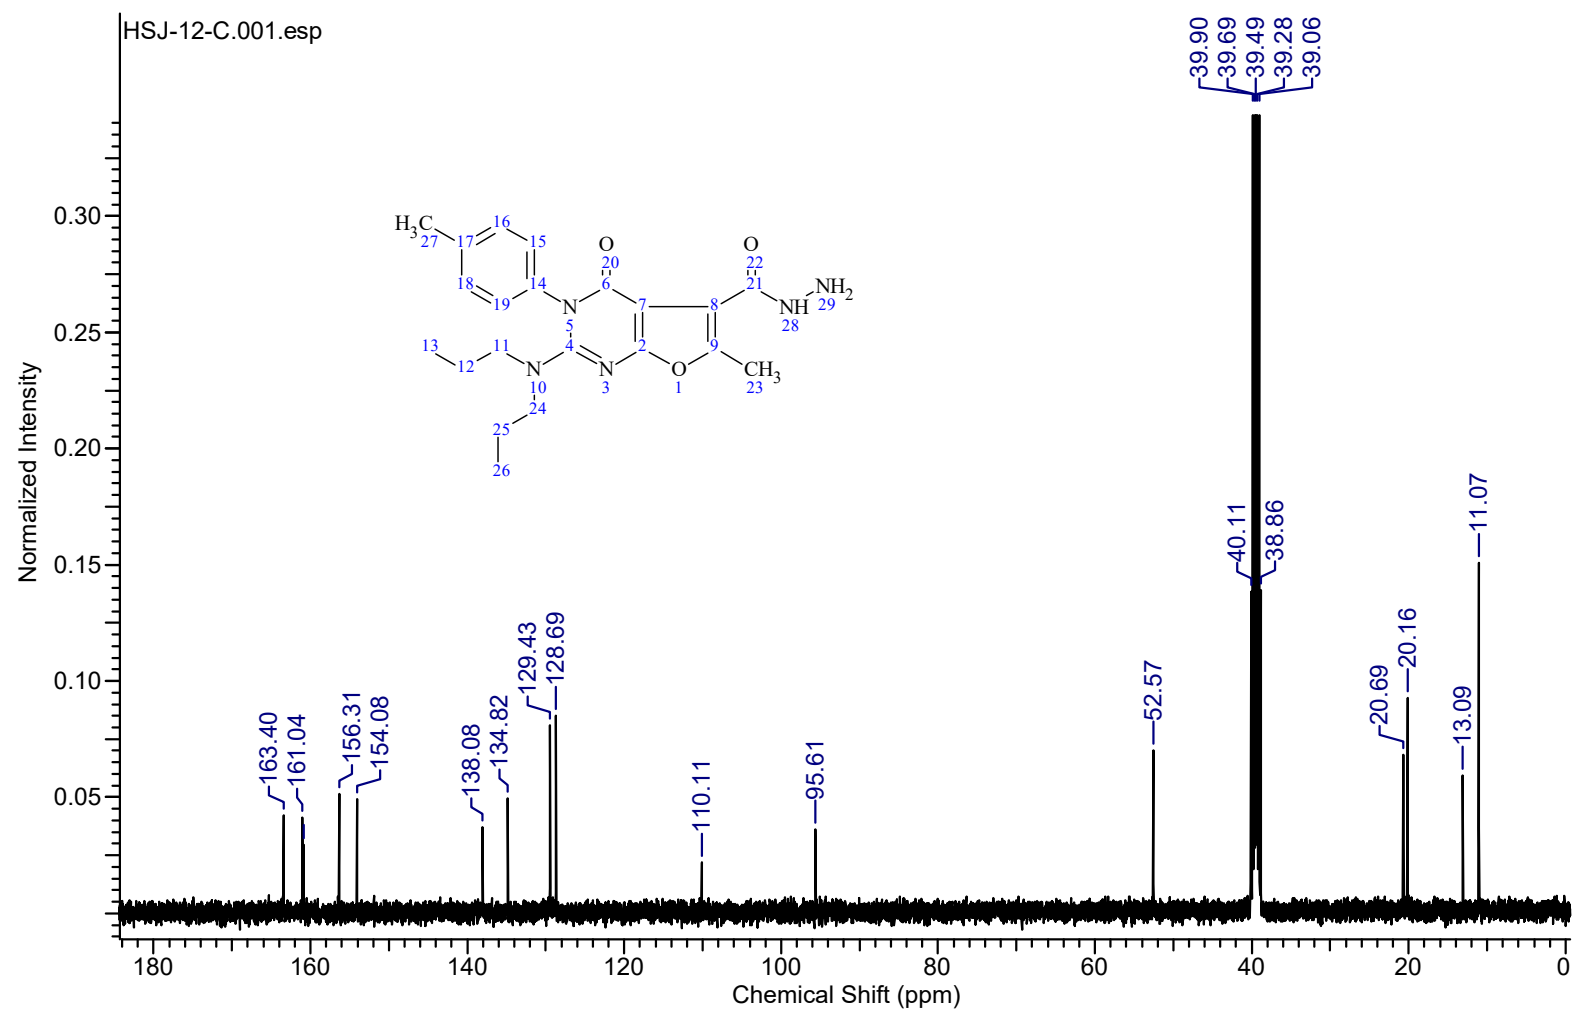

Fig.S28: <sup>13</sup>C NMR spectrum of compound 6n



**ESI-MS of Compounds 6a-n**  
**(Fig. S29-39)**

13\_20200106043526 #21 RT: 0.13 AV: 1 NL: 2.93E7  
T: +c ESI Q1MS [200.000-600.000]

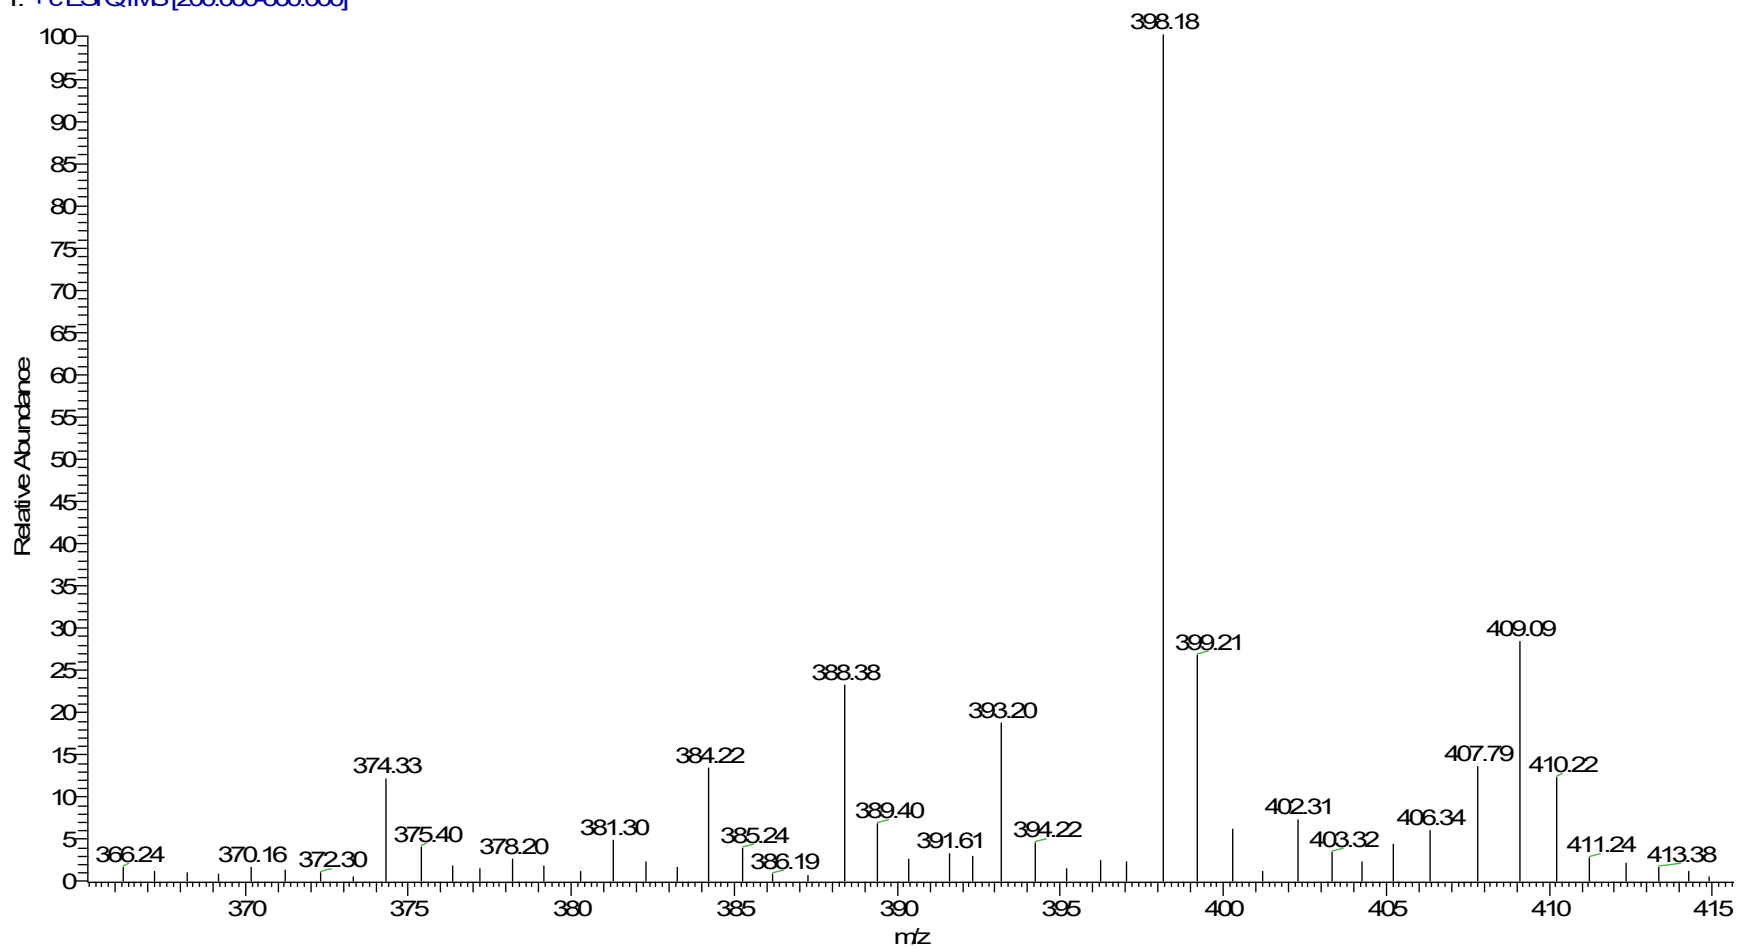

Fig.S29: ESI-MS spectrum of compound 6n

15 #9 RT: 0.04 AV: 1 NL: 5.26E6  
T: +cESI Q1MS [200.000-500.000]

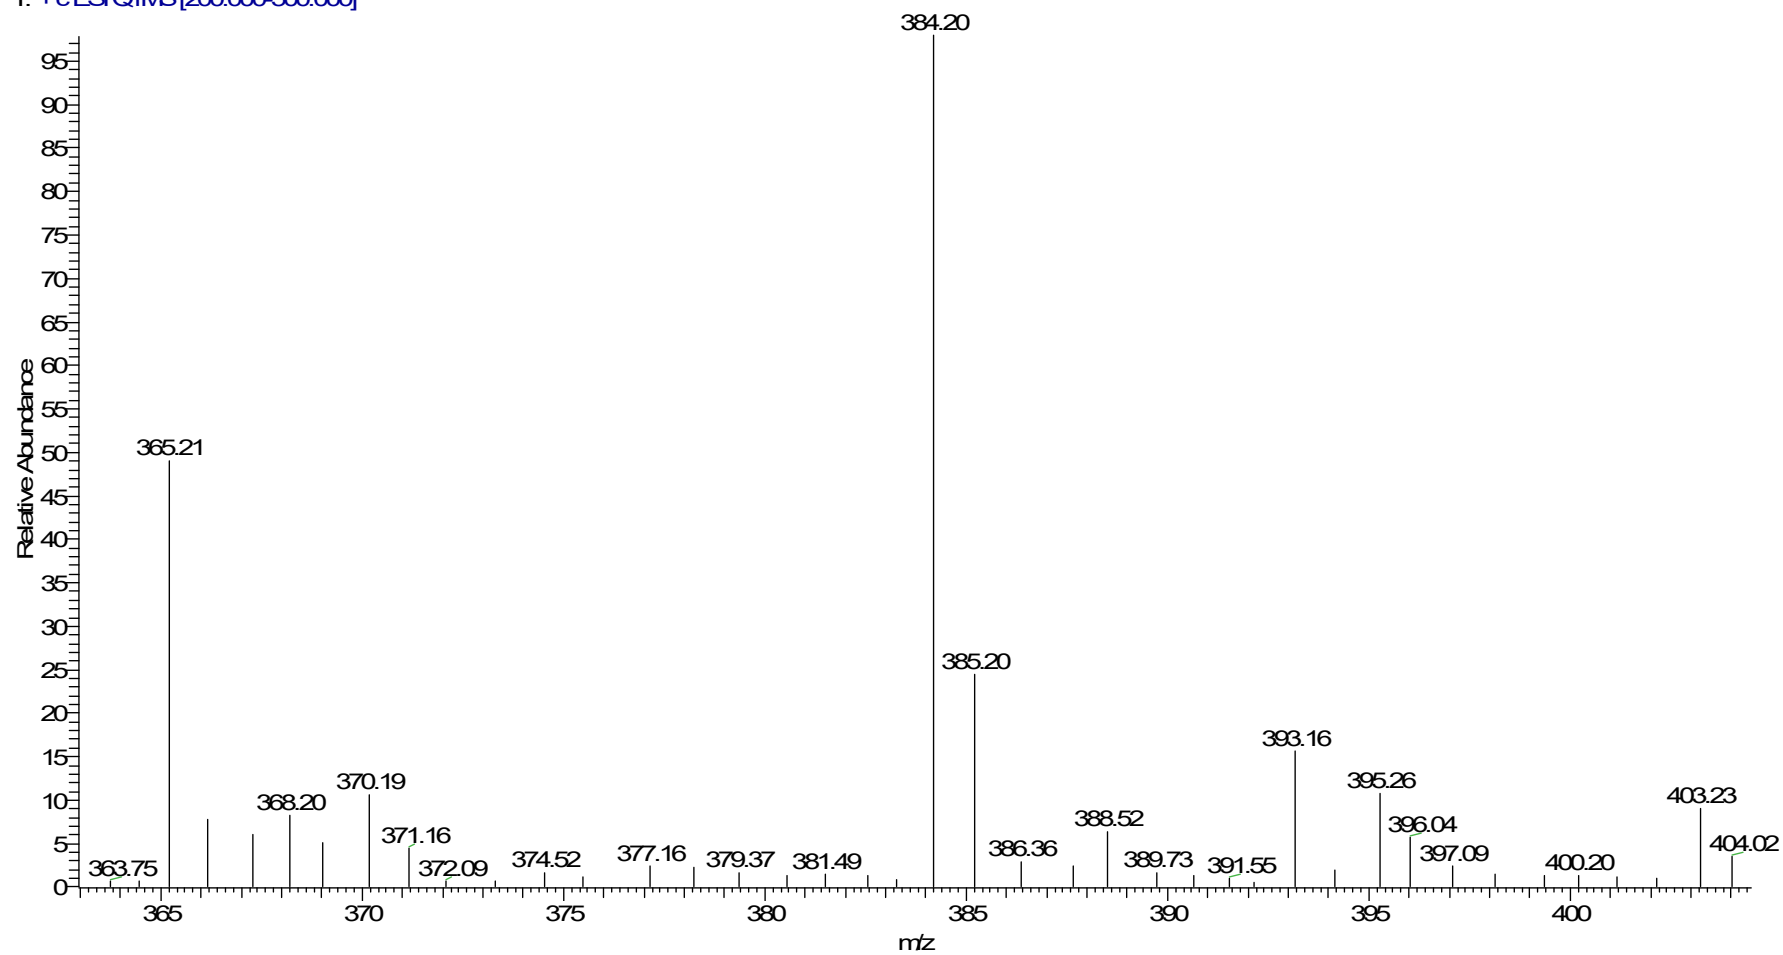

Fig.S30: ESI-MS spectrum of compound 6m

hsj-02 #3 RT: 0.01 AV: 1 NL: 8.73E7  
T: +cESI Q1MS [200.000-600.000]

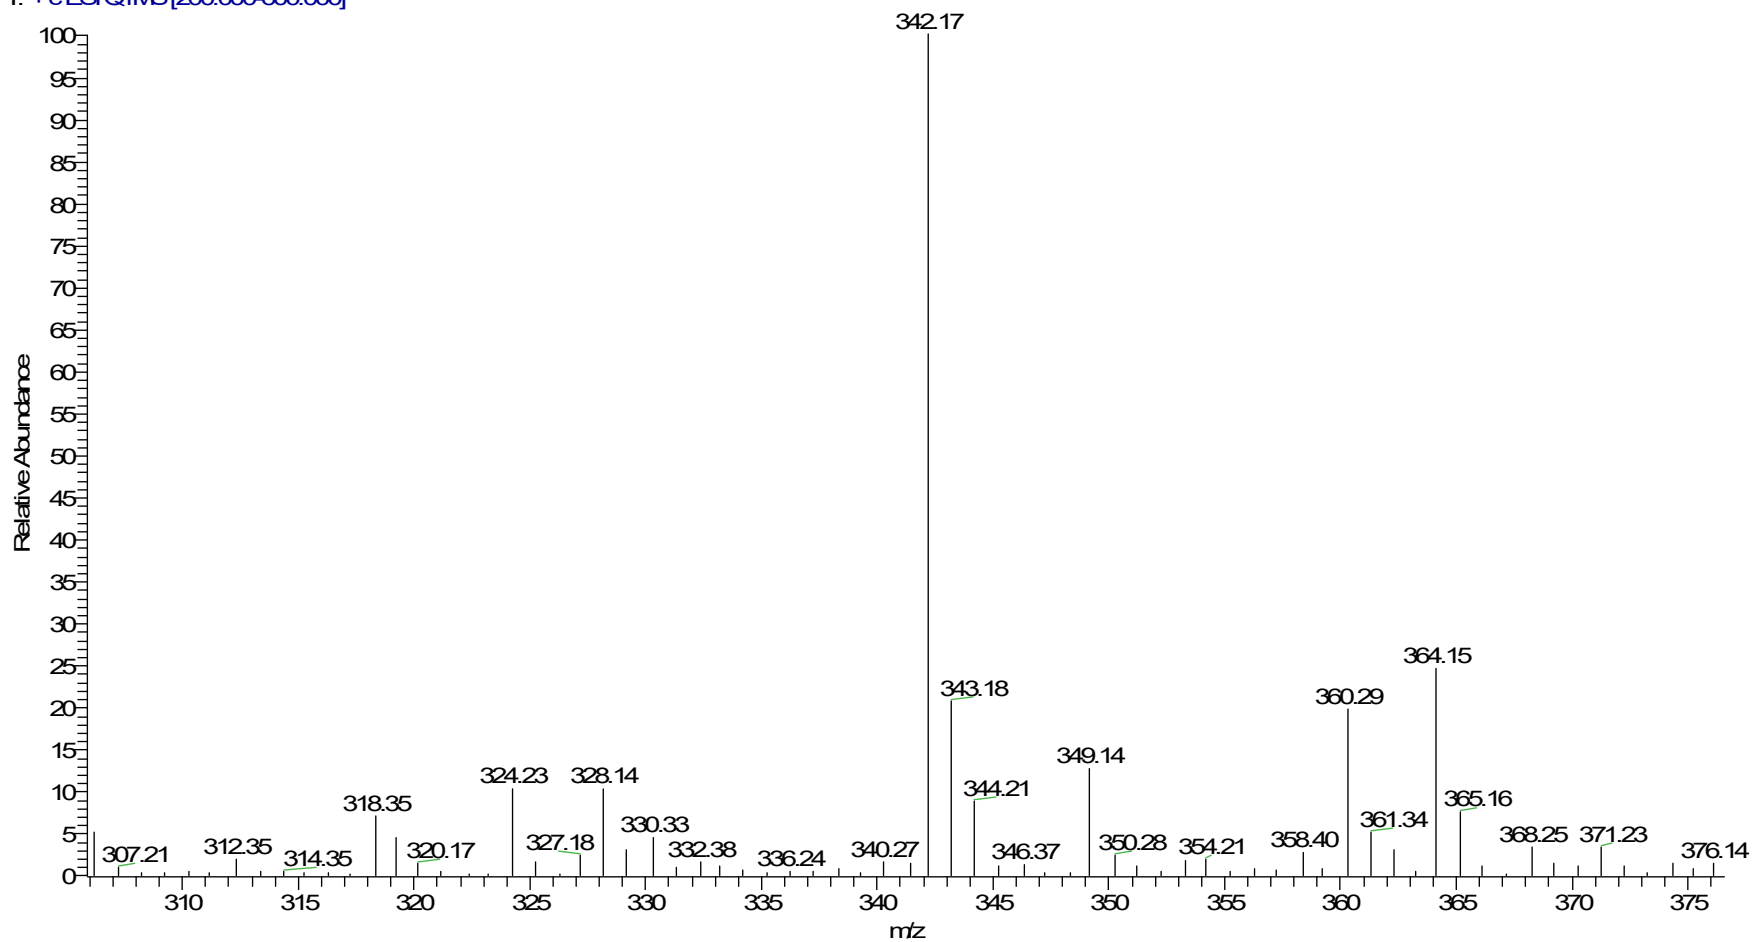

Fig.S31: ESI-MS spectrum of compound 6a

hsj-03 #18 RT: 0.11 AV: 1 NL: 1.95E6  
T: -c ESI Q1MS [200.000-600.000]

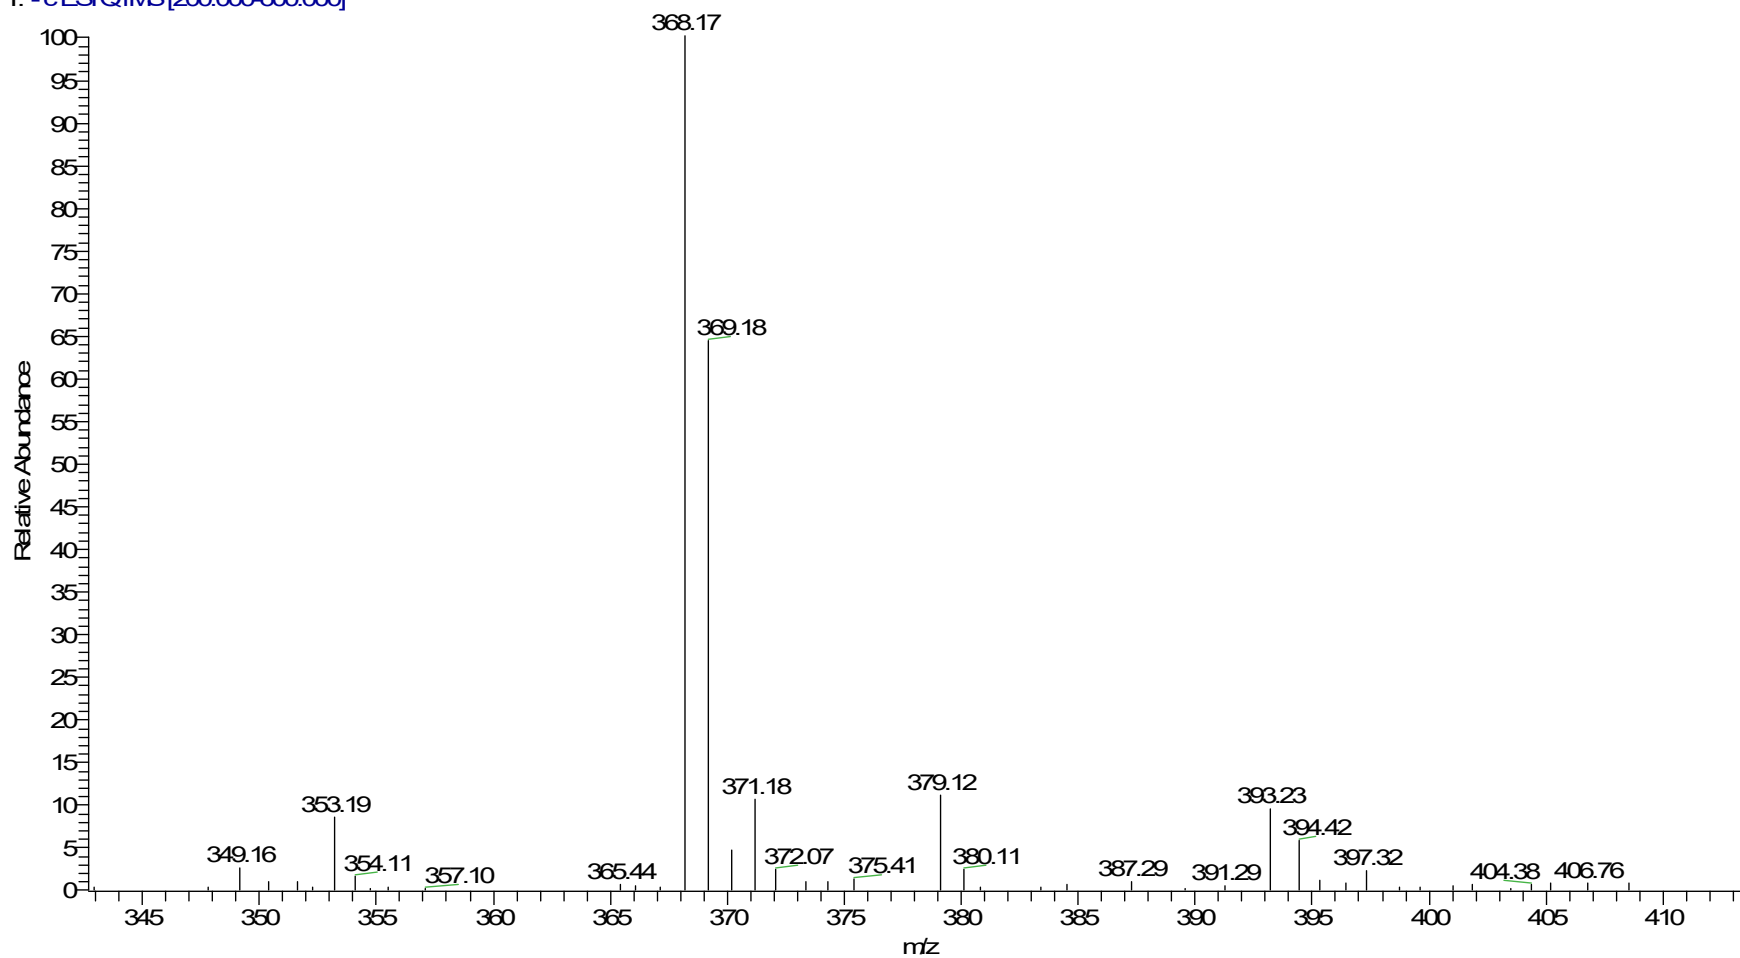

Fig.S32: ESI-MS spectrum of compound 6j

hsj-04\_20191209070847 #59 RT: 0.29 AV: 1 NL: 1.35E7  
T: -c ESI Q1MS [200.000-500.000]

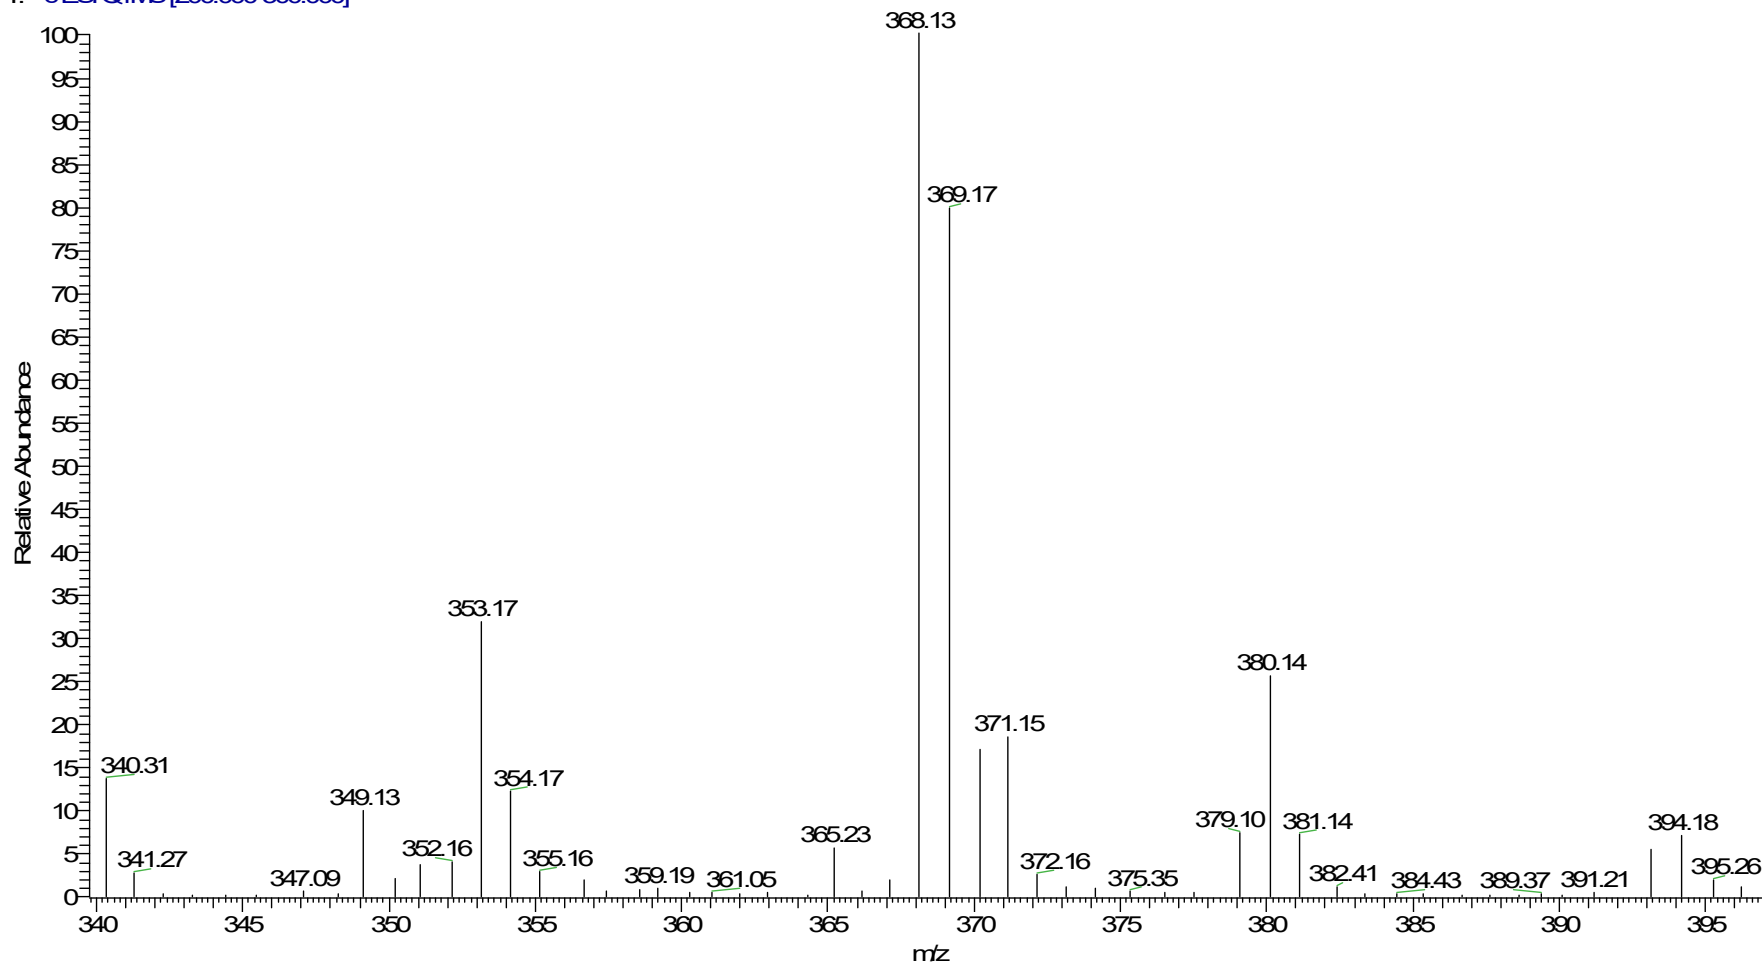

Fig.S33: ESI-MS spectrum of compound 6h

hsj-05\_20191127051841#16 RT: 0.08 AV: 1 NL: 1.51E7  
T: +cESI Q1MS [300.000-600.000]

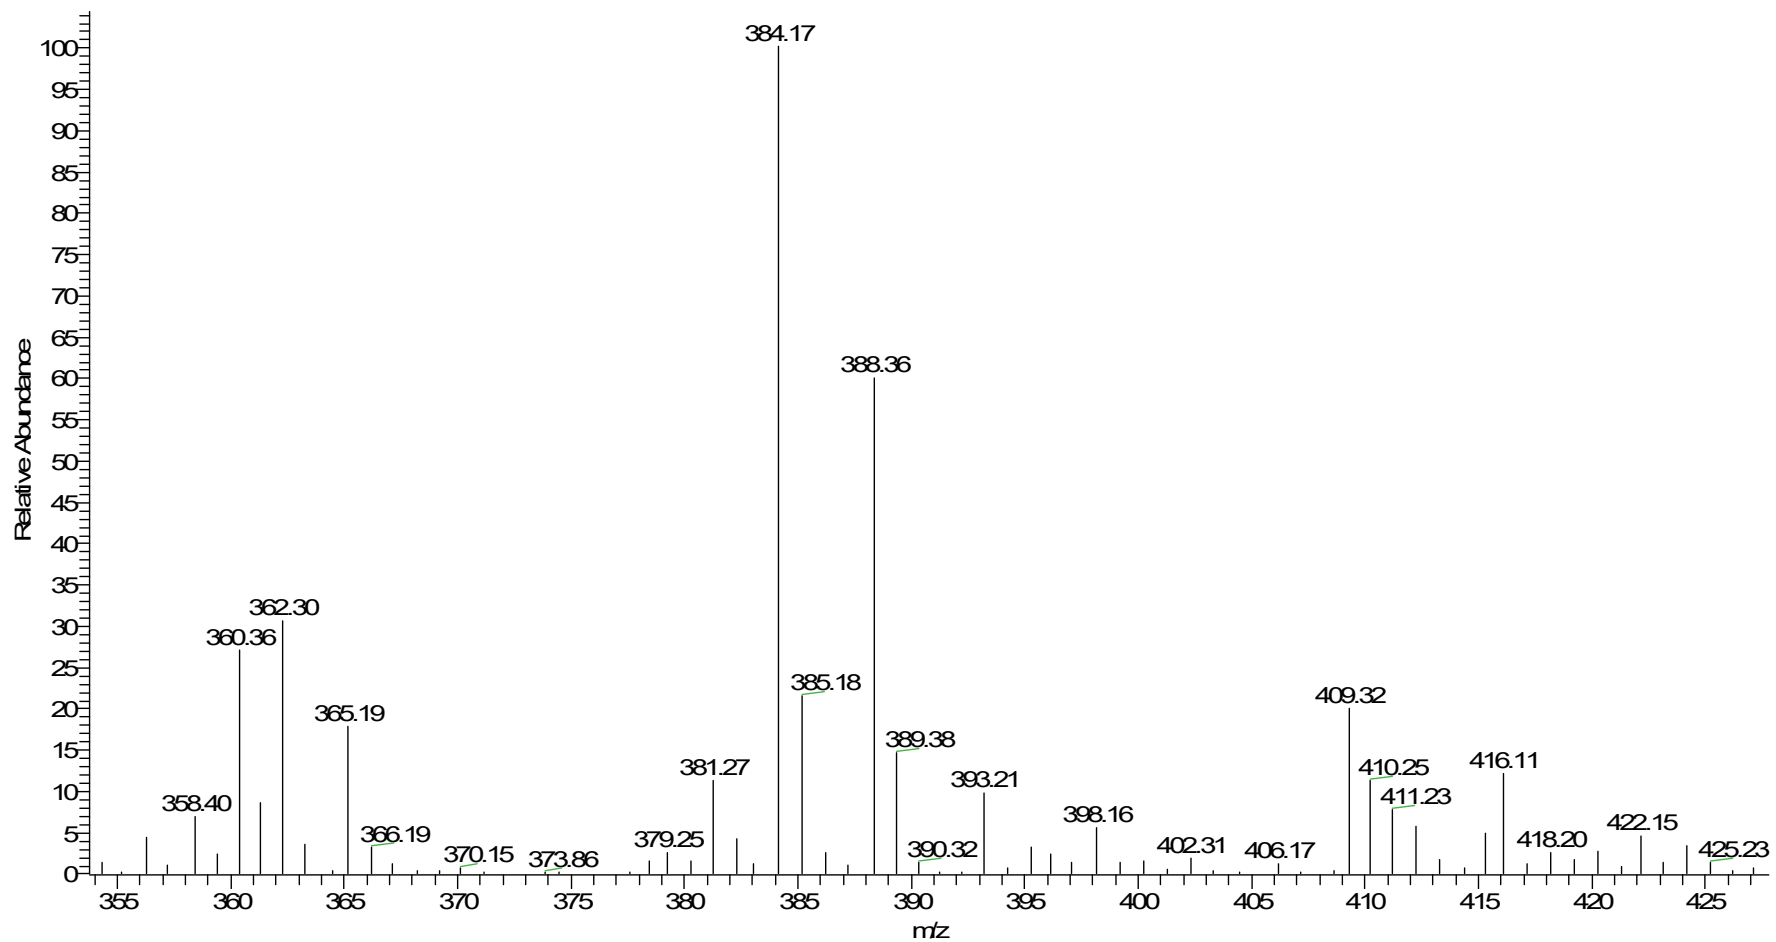

Fig.S34: ESI-MS spectrum of compound 6k

hsj-06\_20191127052851#3 RT: 0.01 AV: 1 NL: 2.12E7  
T: +cESI Q1MS [300.000-500.000]

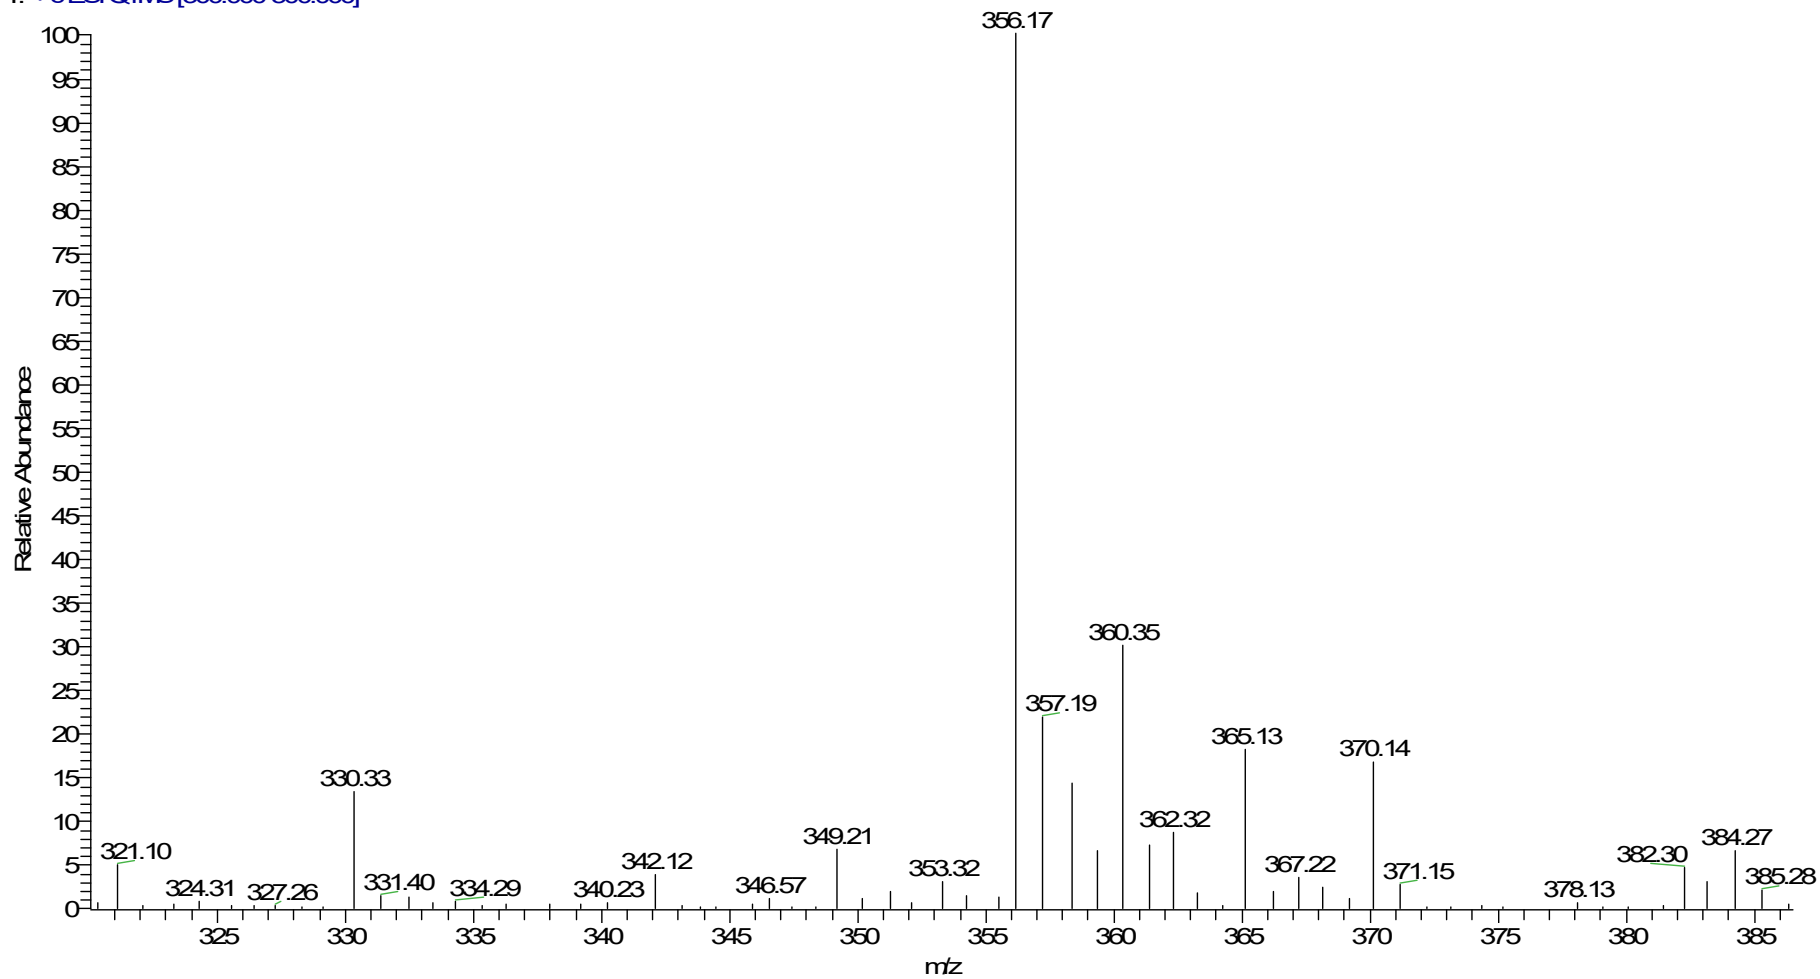

Fig.S35: ESI-MS spectrum of compound 6b



hsj-07 #1 RT: 0.00 AV: 1 NL: 2.92E7  
T: +cESI Q1MS [300.000-500.000]

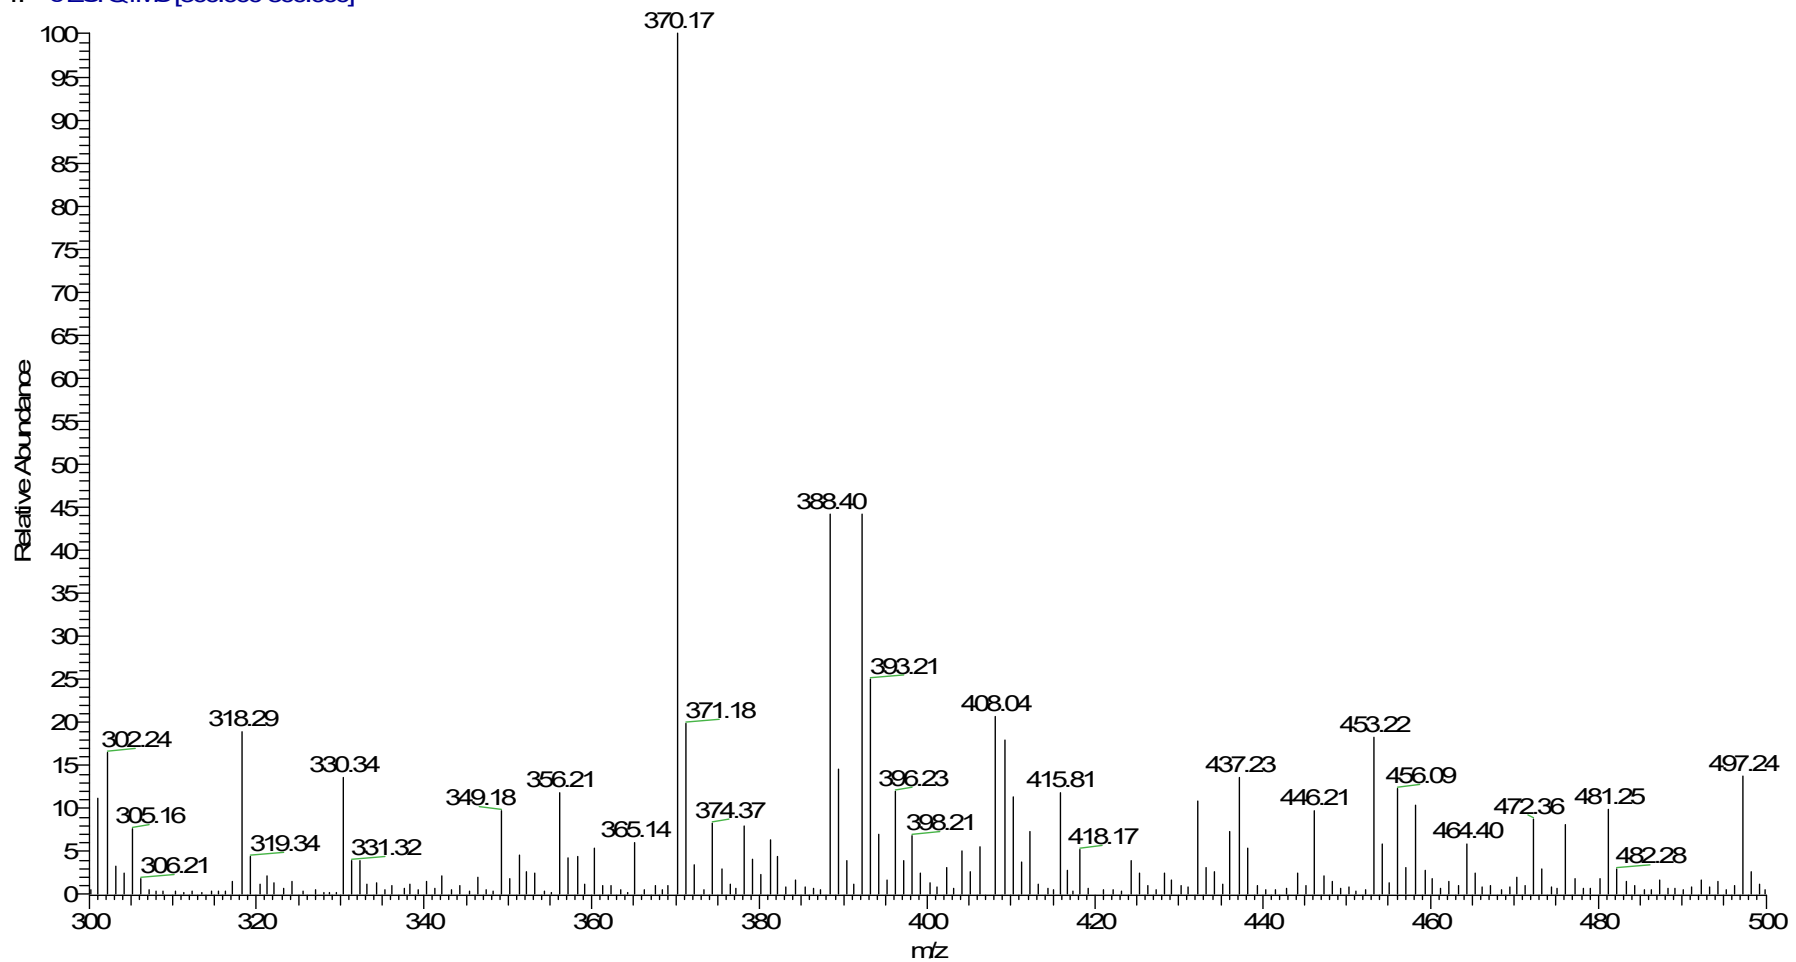

Fig.S36: ESI-MS spectrum of compound 6i

hsj-08\_20191209120507 #11 RT: 0.05 AV: 1 NL: 2.10E6  
T: -c ESI Q1MS [200.000-500.000]

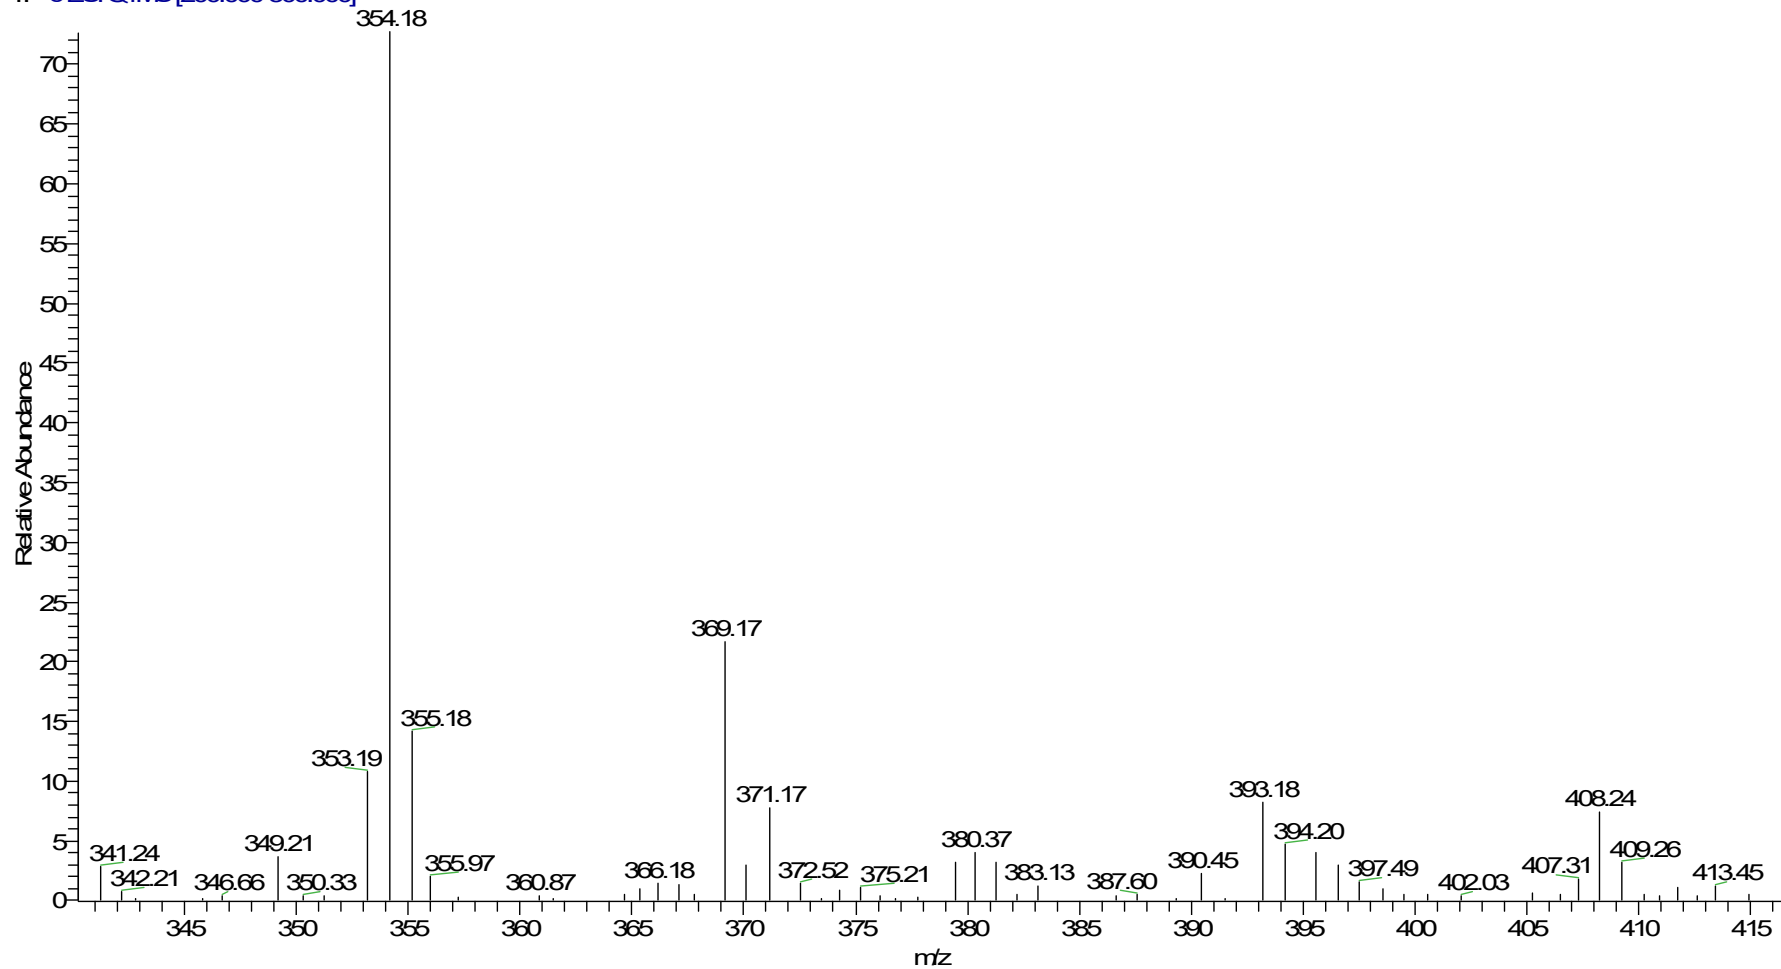

Fig.S37: ESI-MS spectrum of compound 6g

hsj-09\_20191209033721#49 RT: 0.24 AV: 1 NL: 4.41E7  
T: +cESI Q1MS [200.000-500.000]

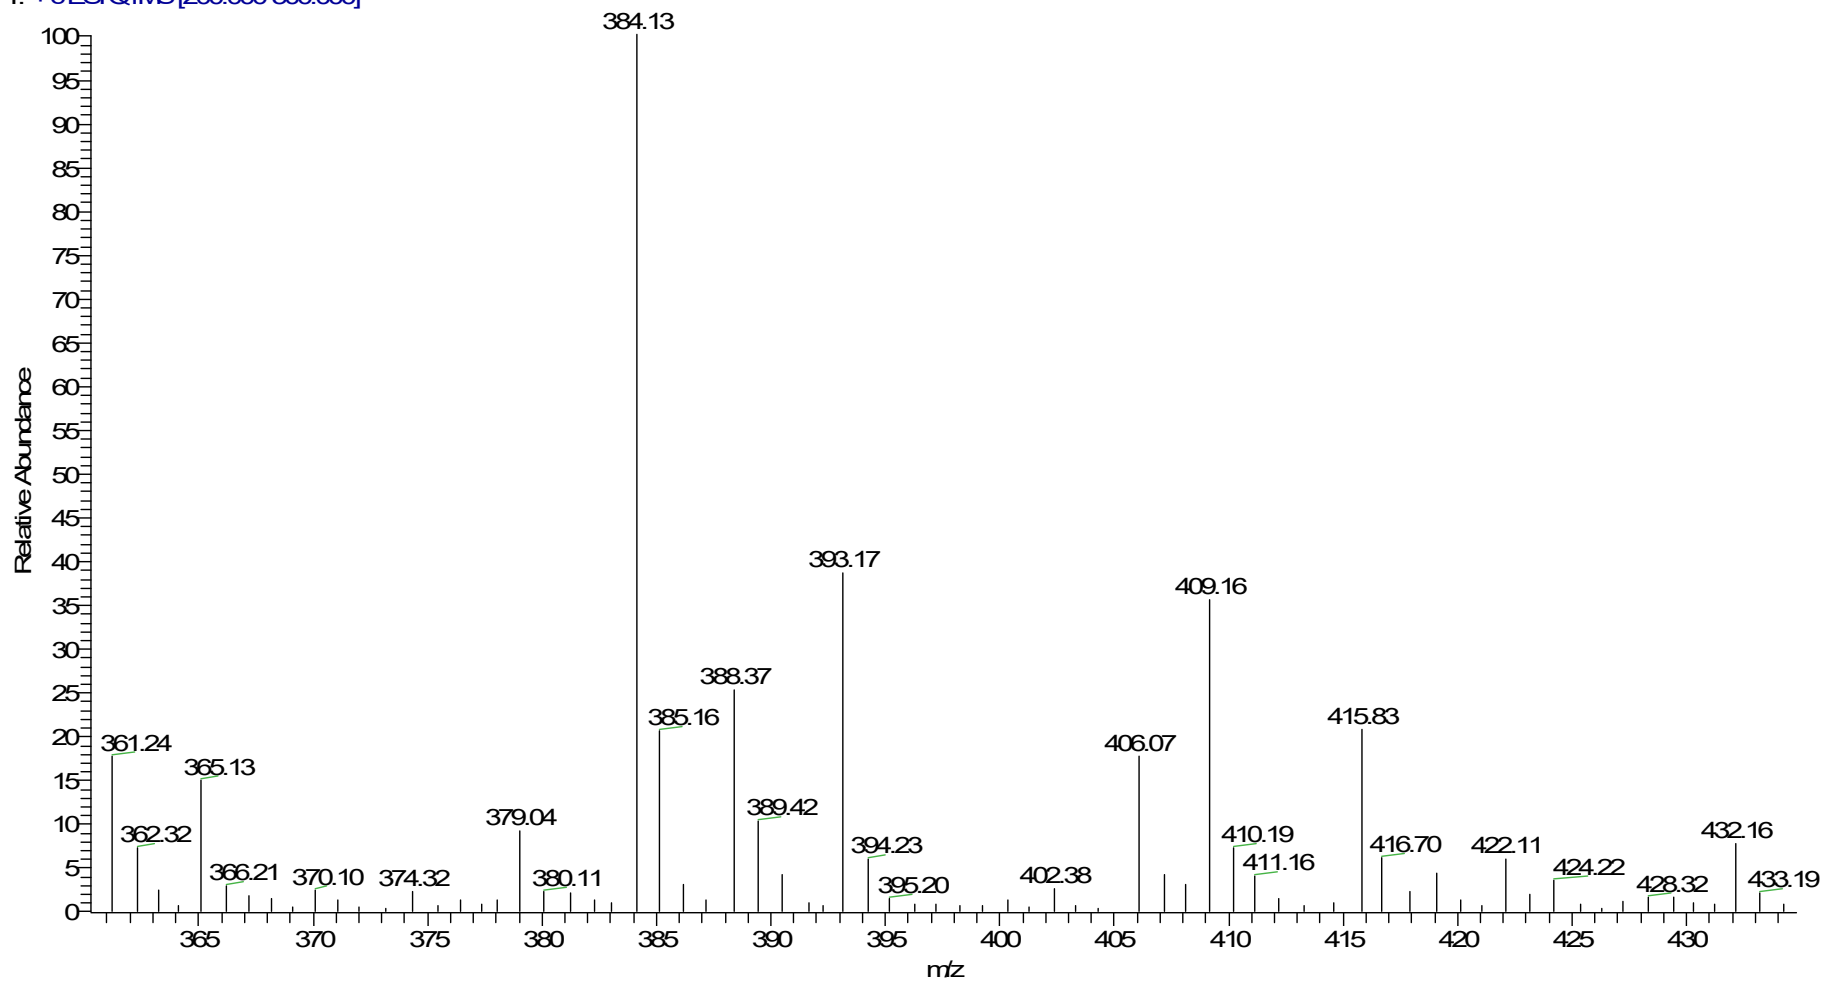

Fig.S38: ESI-MS spectrum of compound 6l

hsj-10\_20191209035419 #1 RT: 0.00 AV: 1 NL: 5.13E7  
T: +cESI Q1MS [200.000-500.000]

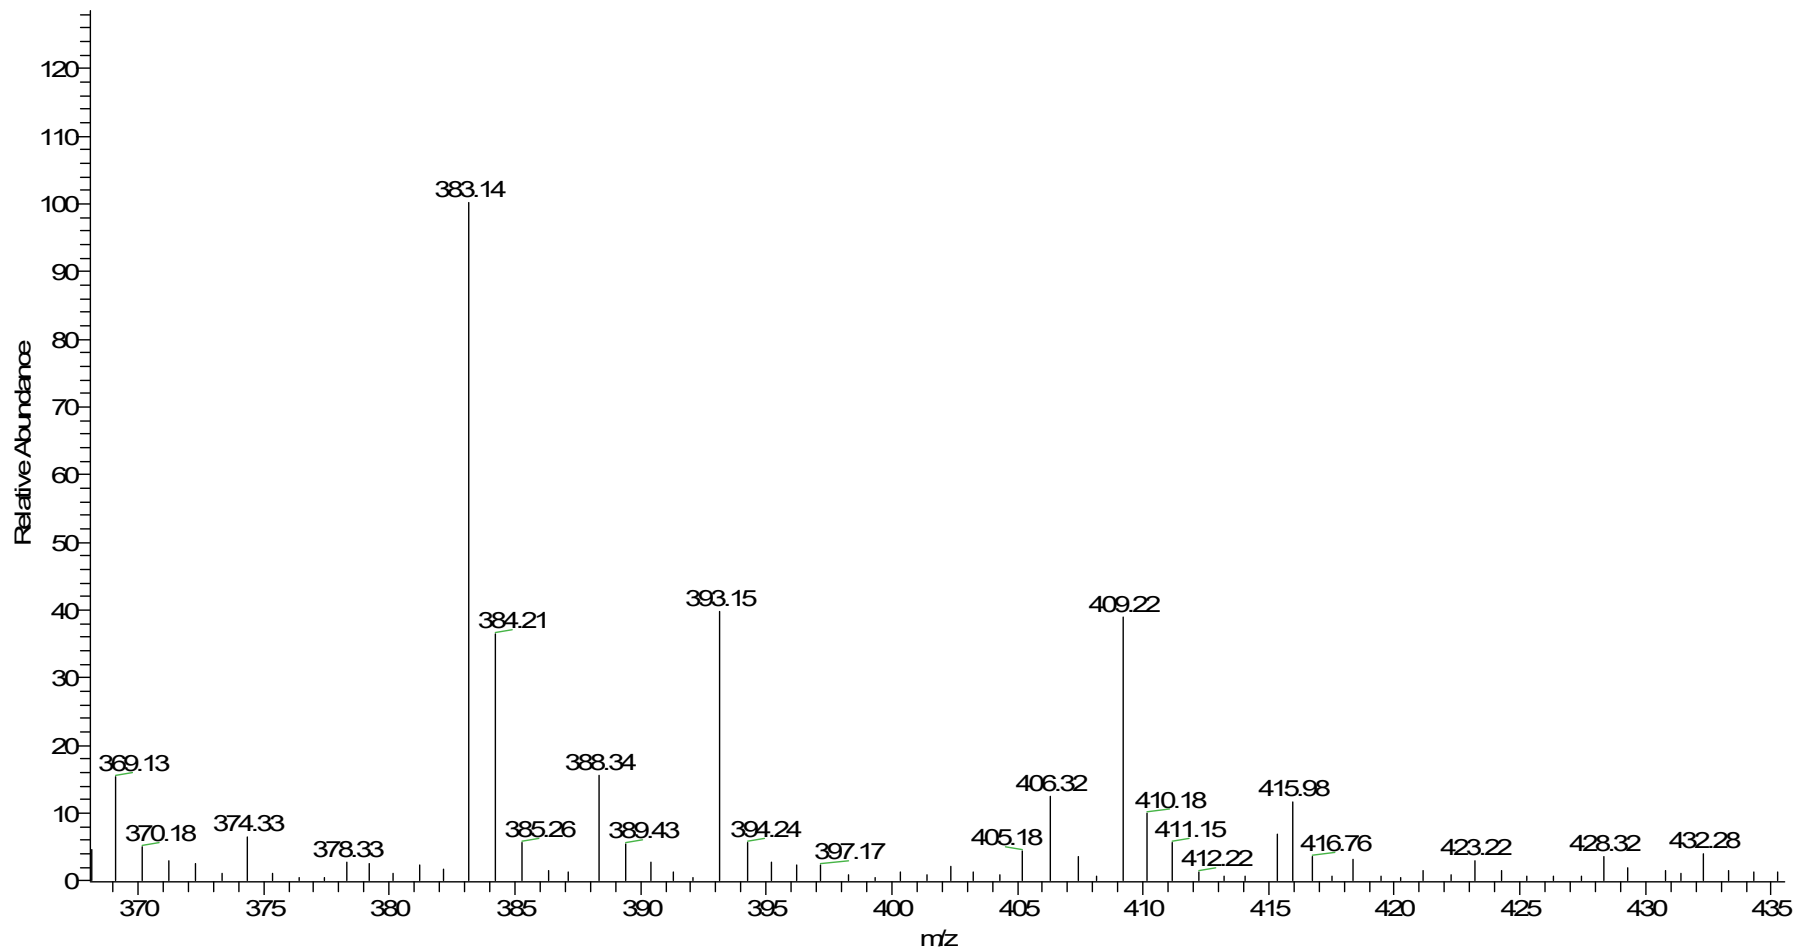

Fig.S39: ESI-MS spectrum of compound 6n

**$^1\text{H}$ NMR of Compounds 10a-i  
(Fig. S40-48)**

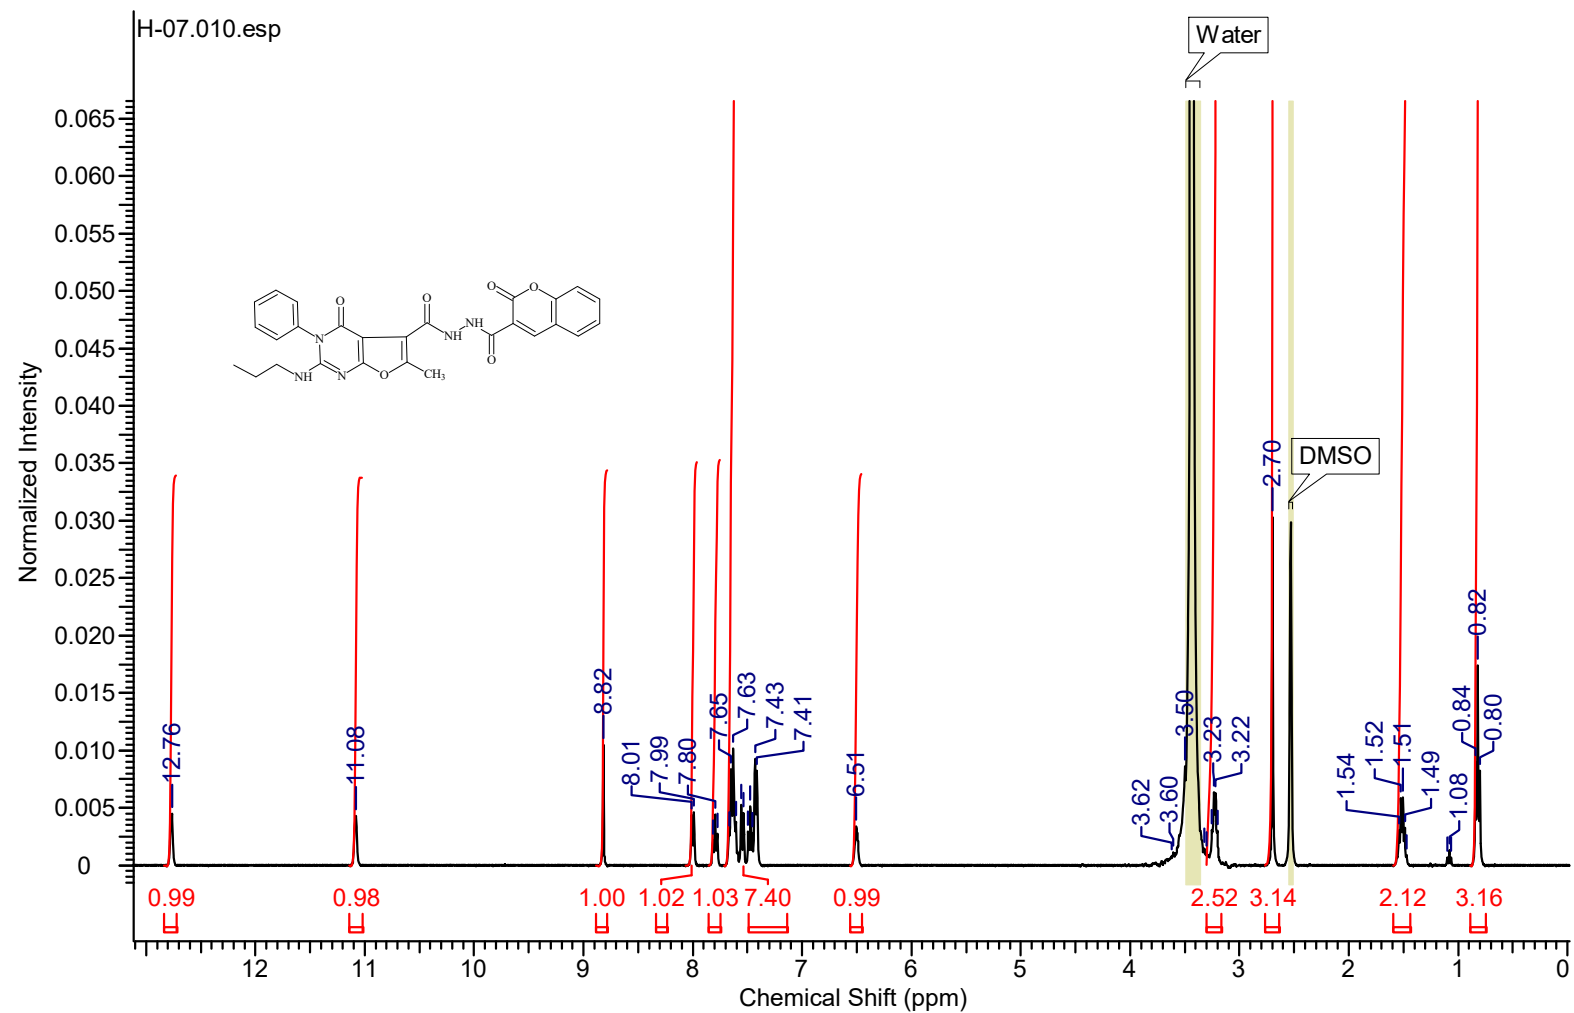

Fig.S40: <sup>1</sup>H NMR spectrum of compound 10a

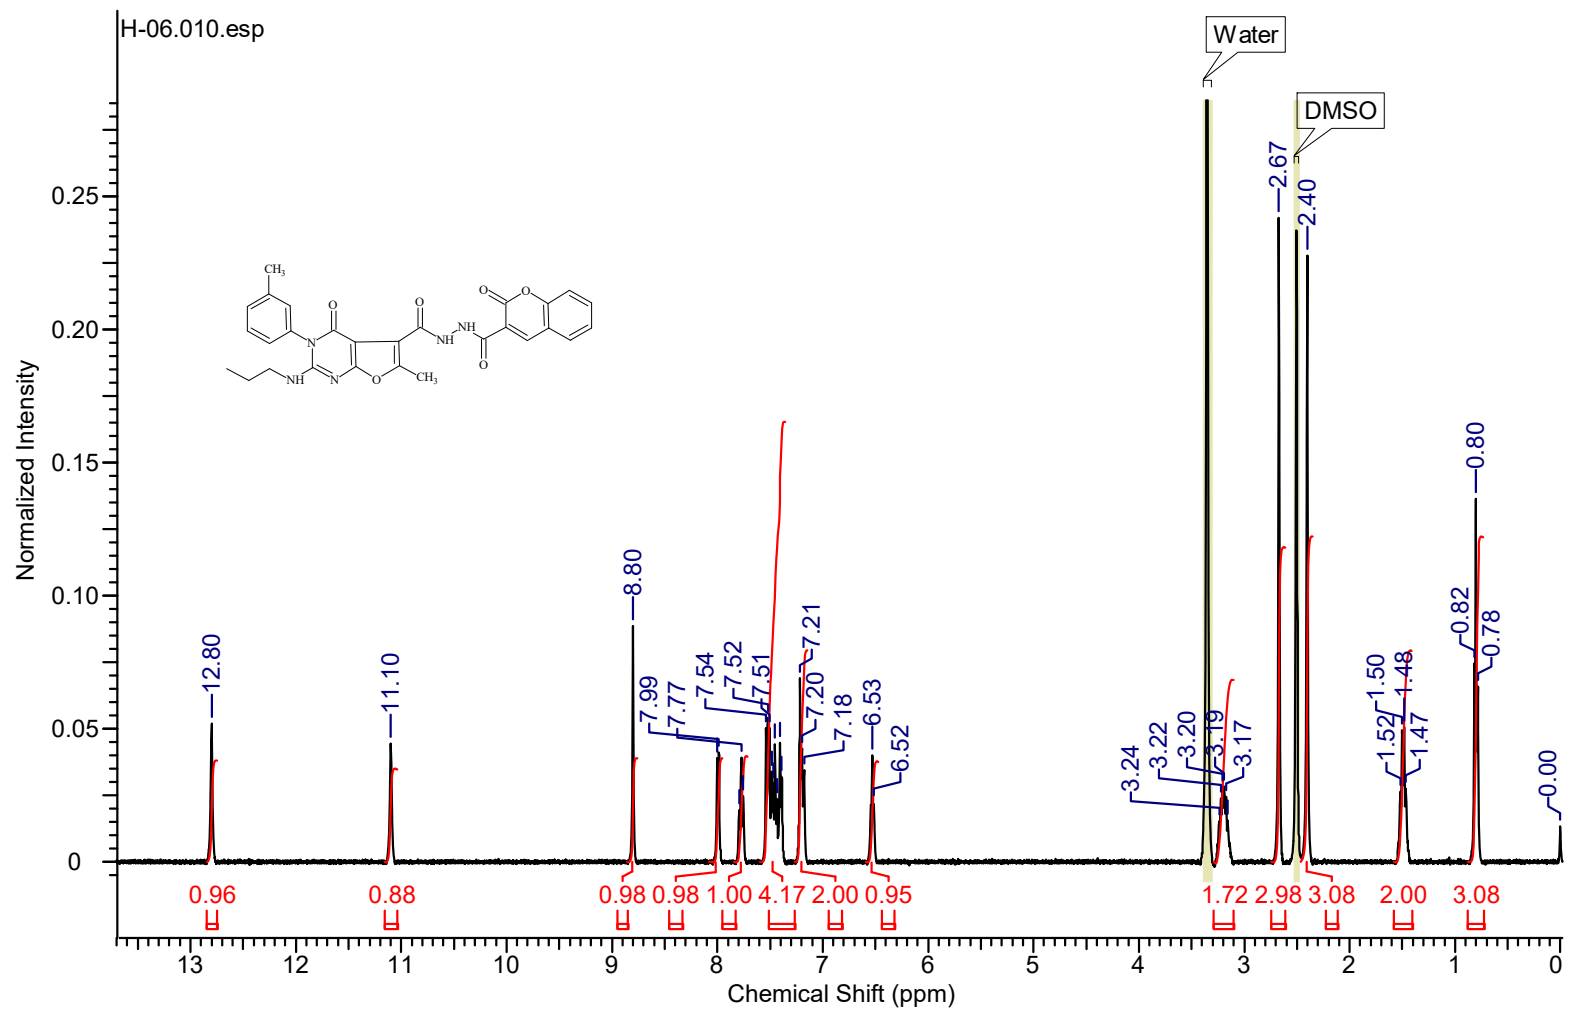

Fig.S41:  $^1\text{H}$  NMR spectrum of compound 10b

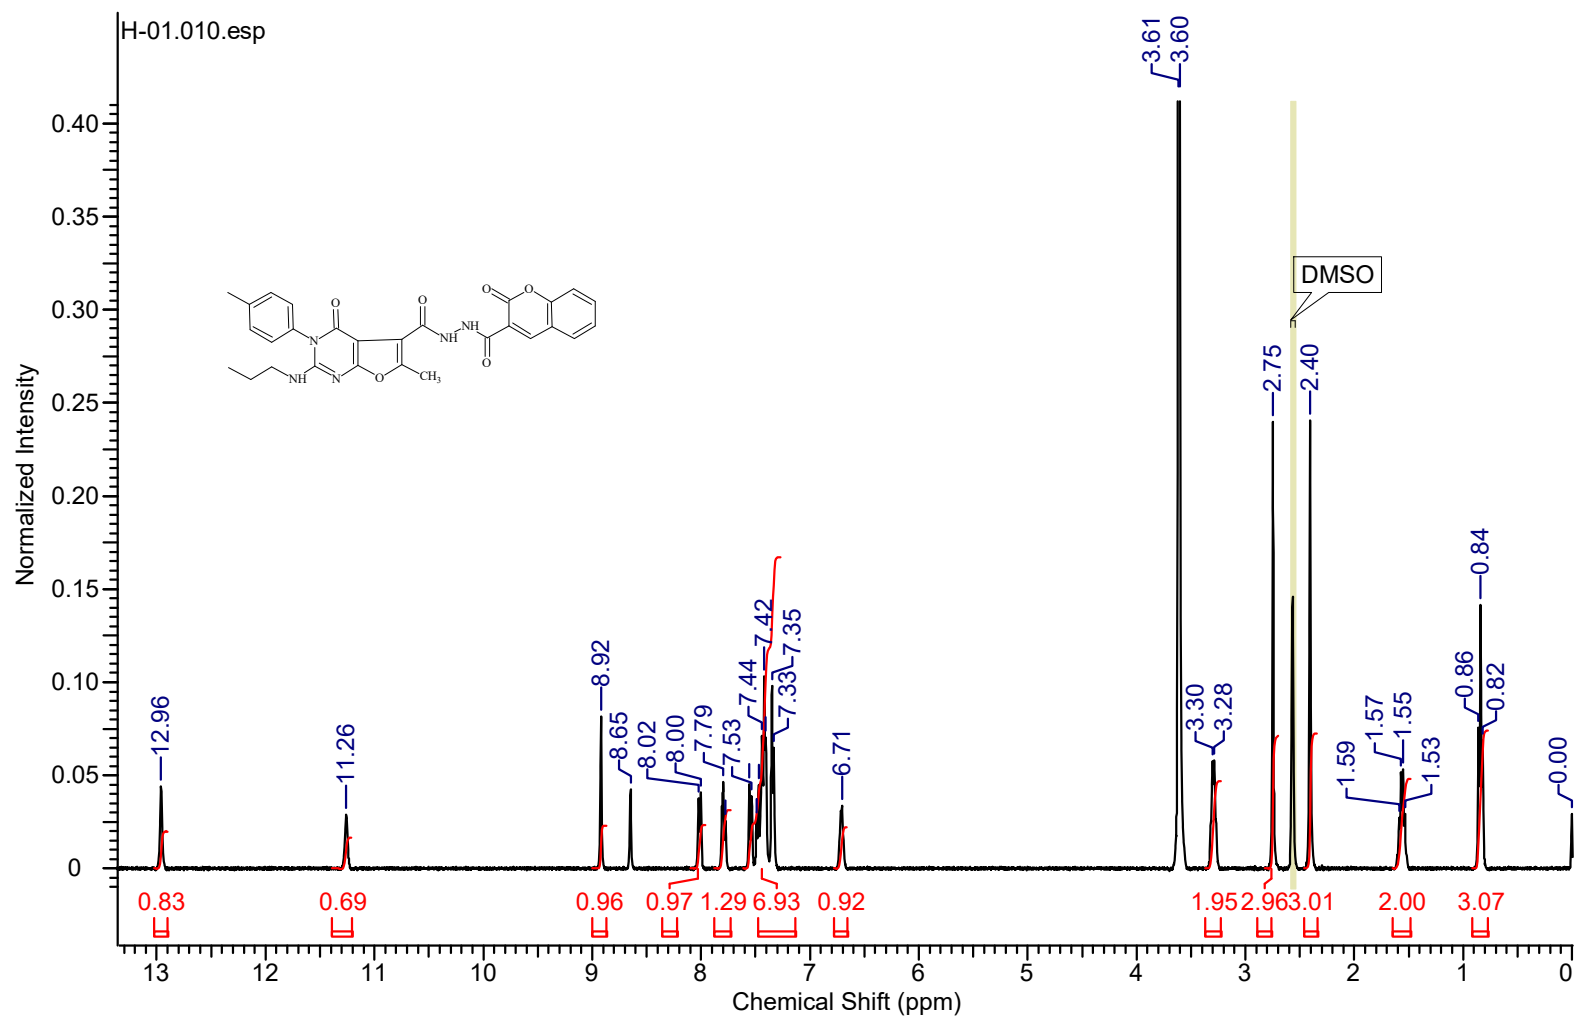

Fig.S42:  $^1\text{H}$  NMR spectrum of compound 10c



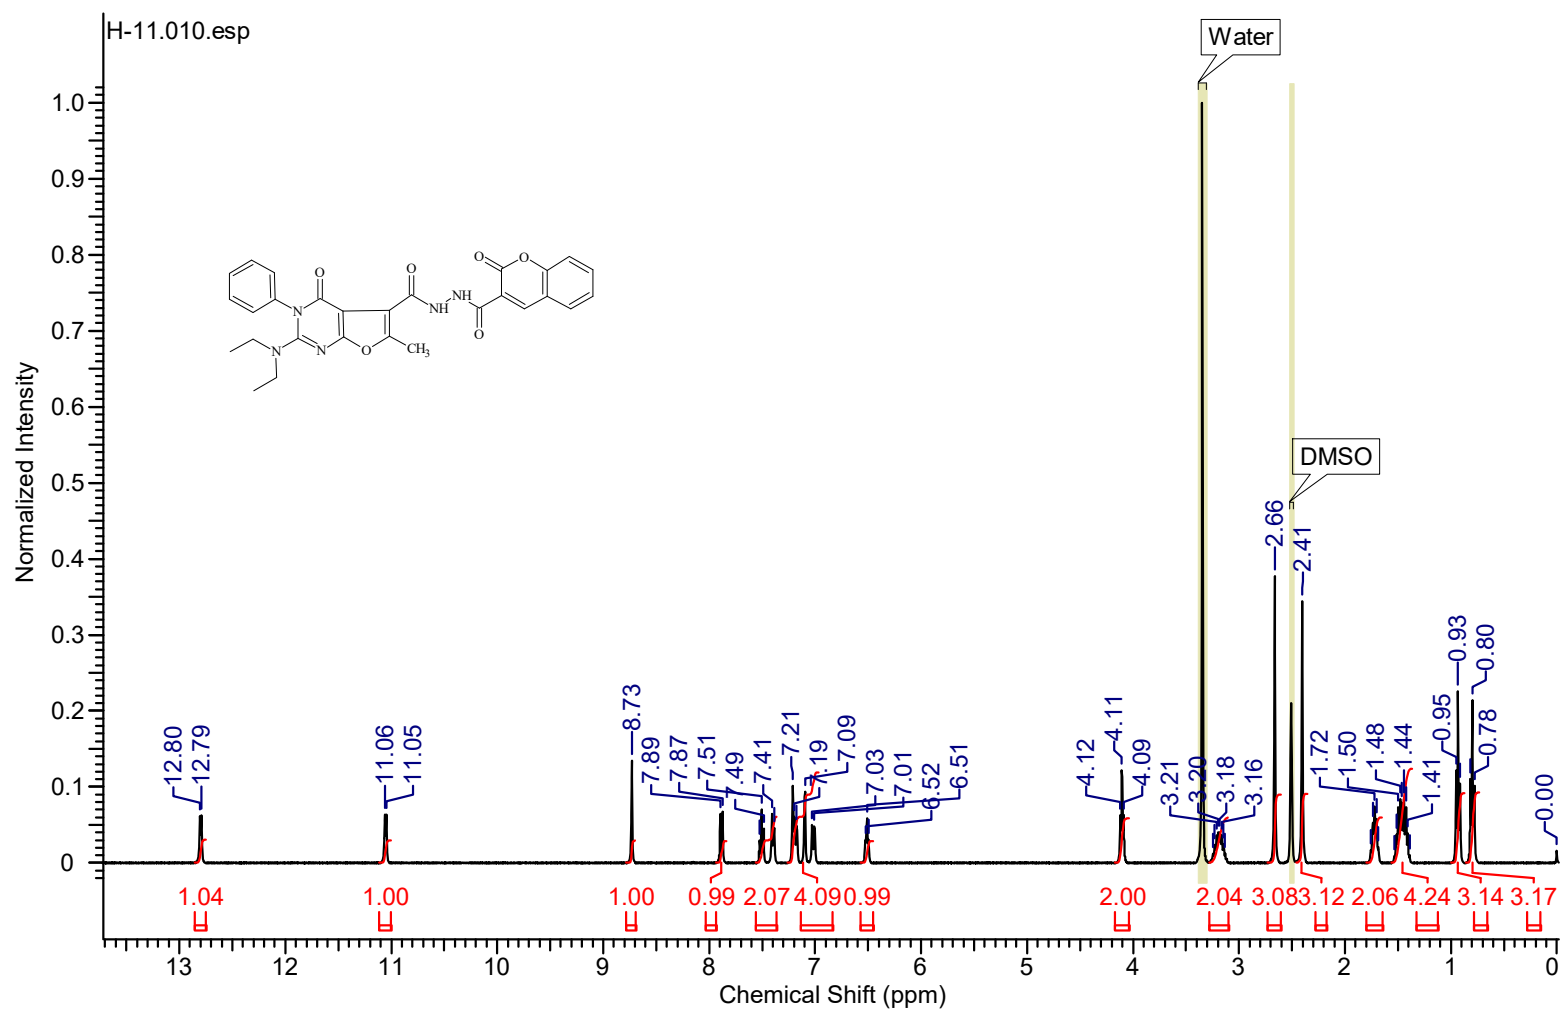

Fig.S43:  $^1\text{H}$  NMR spectrum of compound 10d

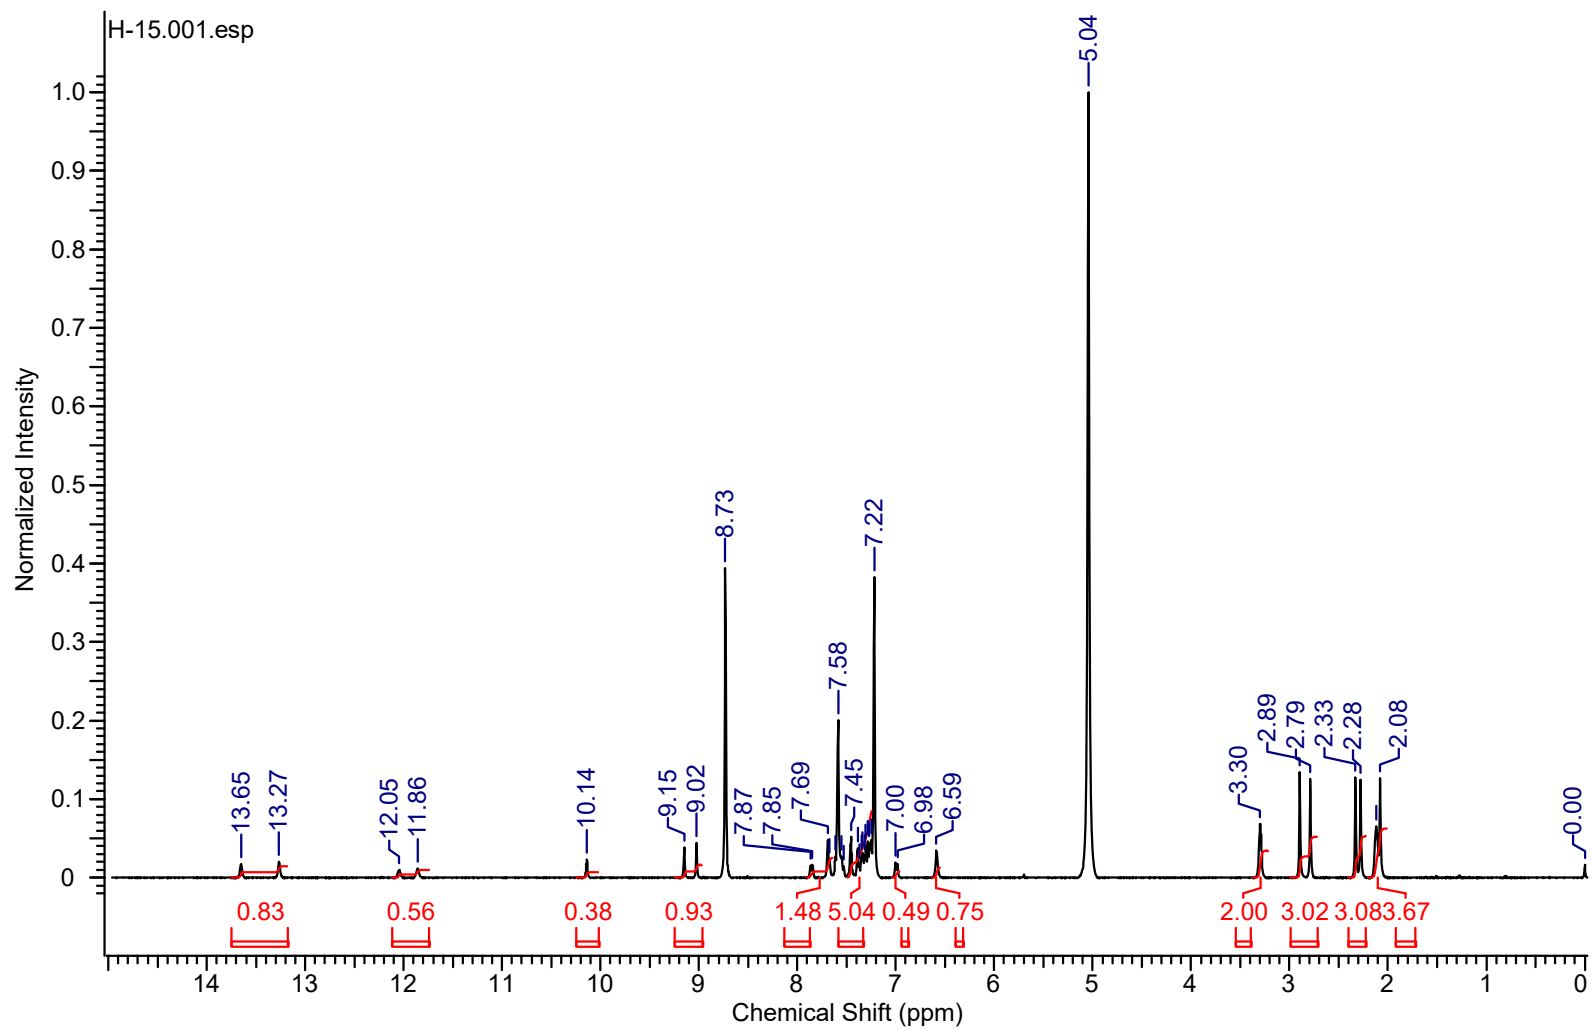

Fig.S44: <sup>1</sup>H NMR spectrum of compound 10e

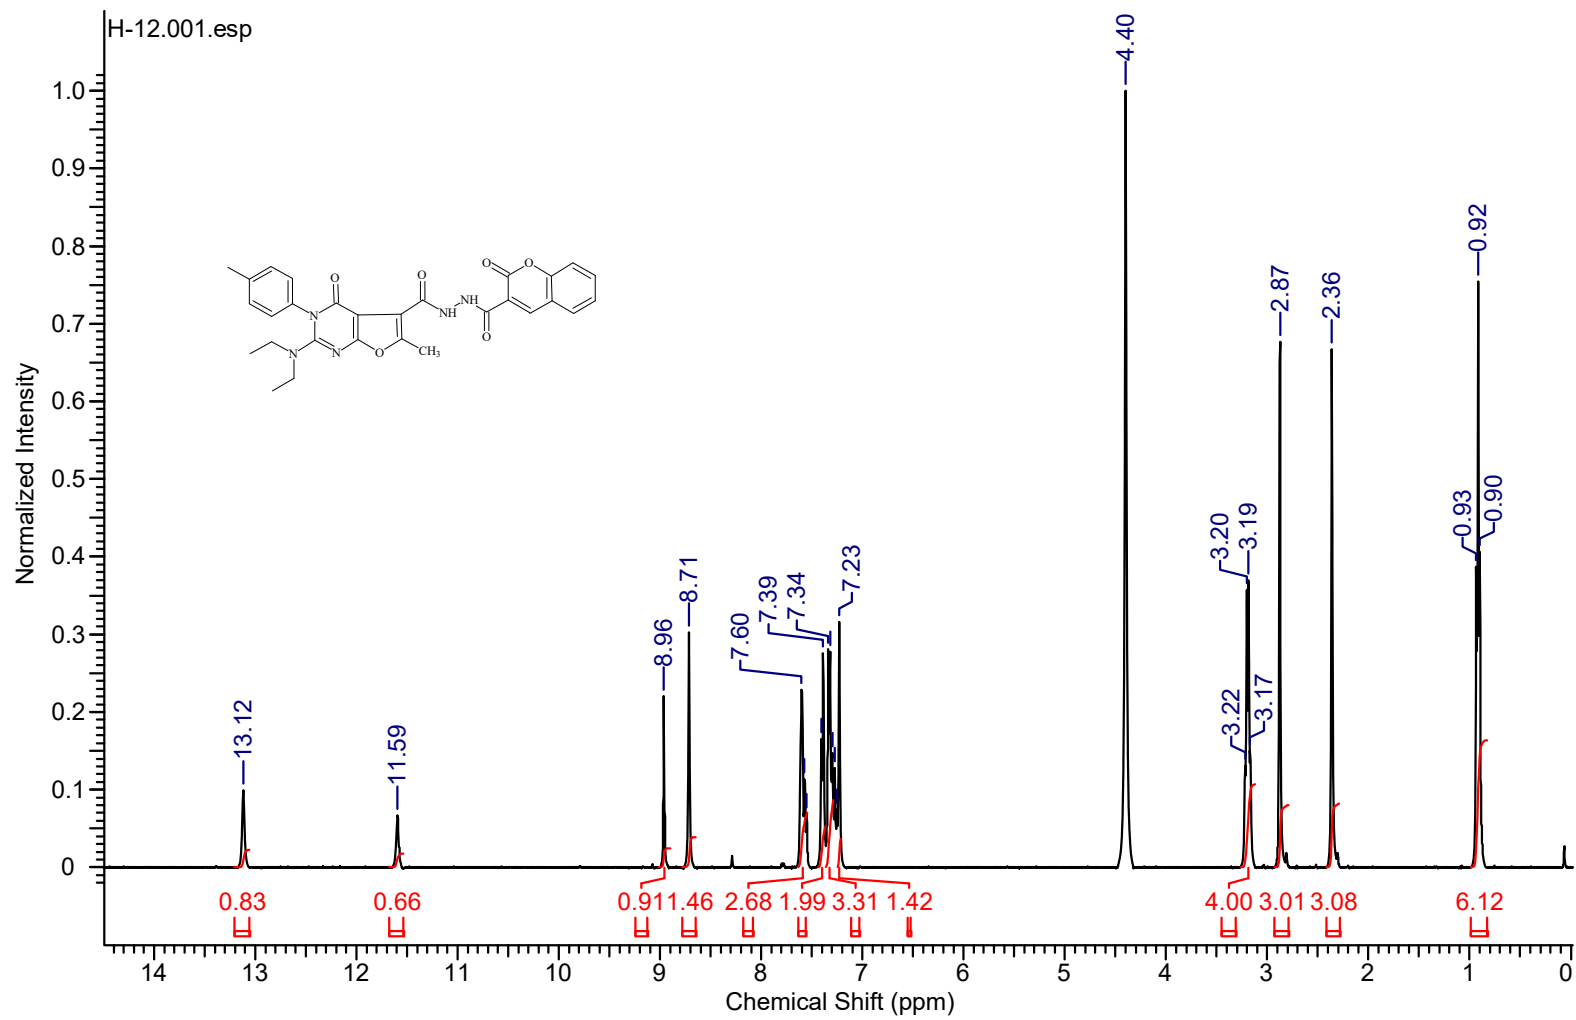

Fig.S45:  $^1\text{H}$  NMR spectrum of compound 10f

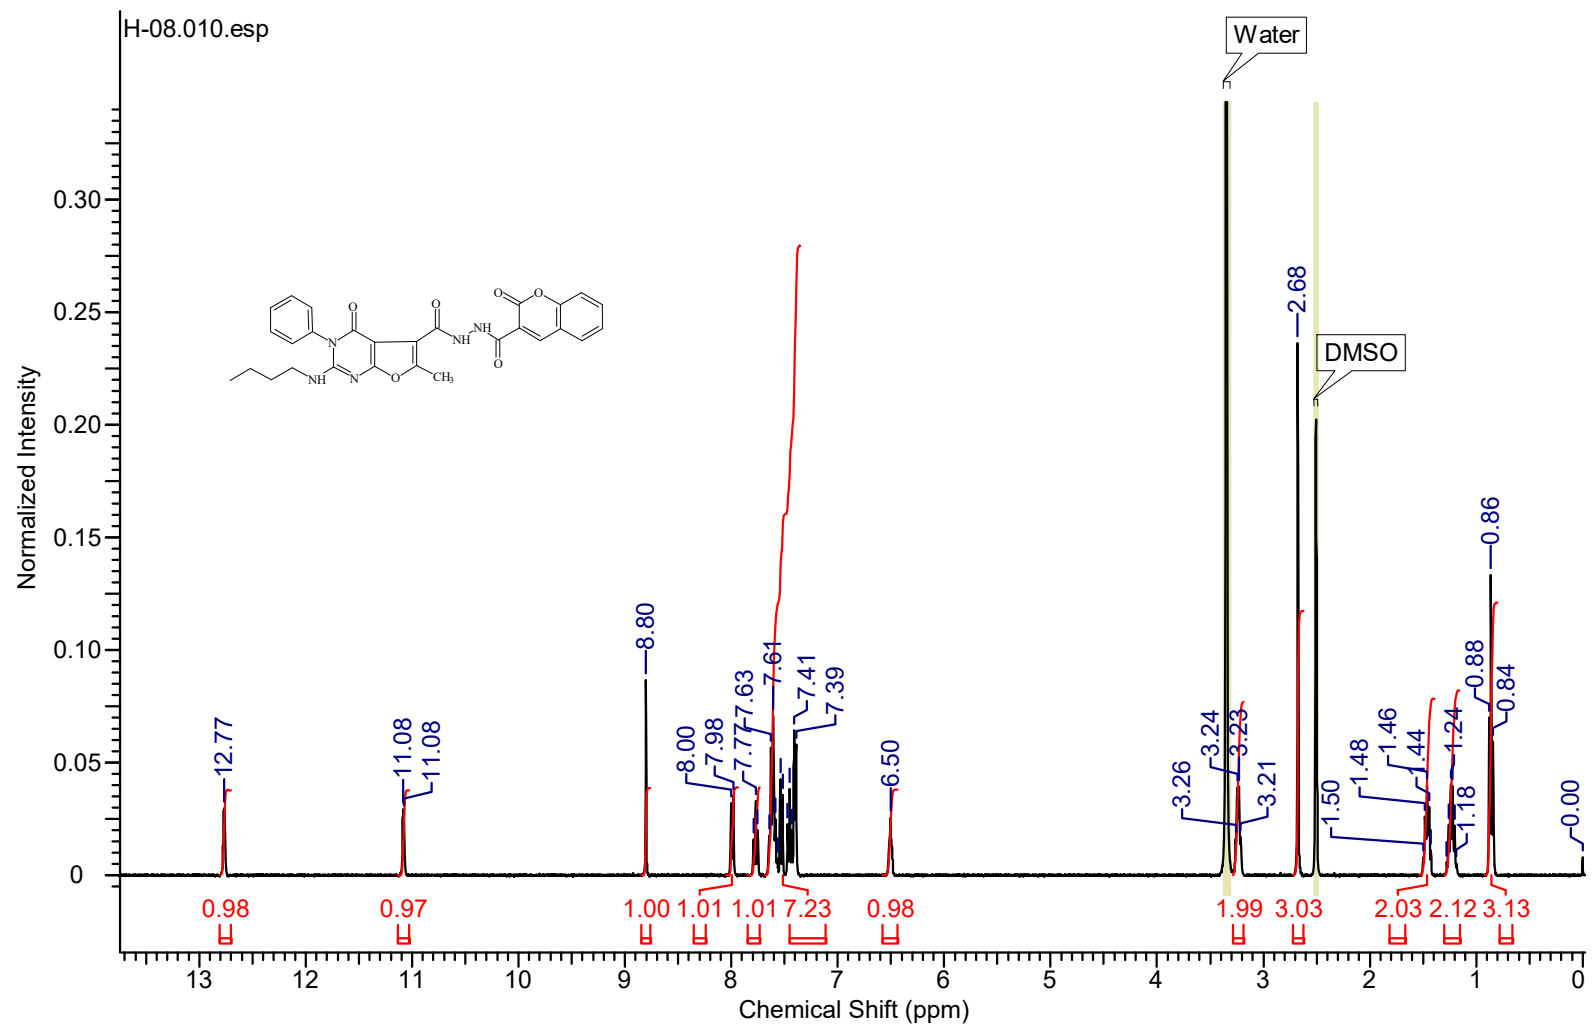

Fig.S46: <sup>1</sup>H NMR spectrum of compound 10g

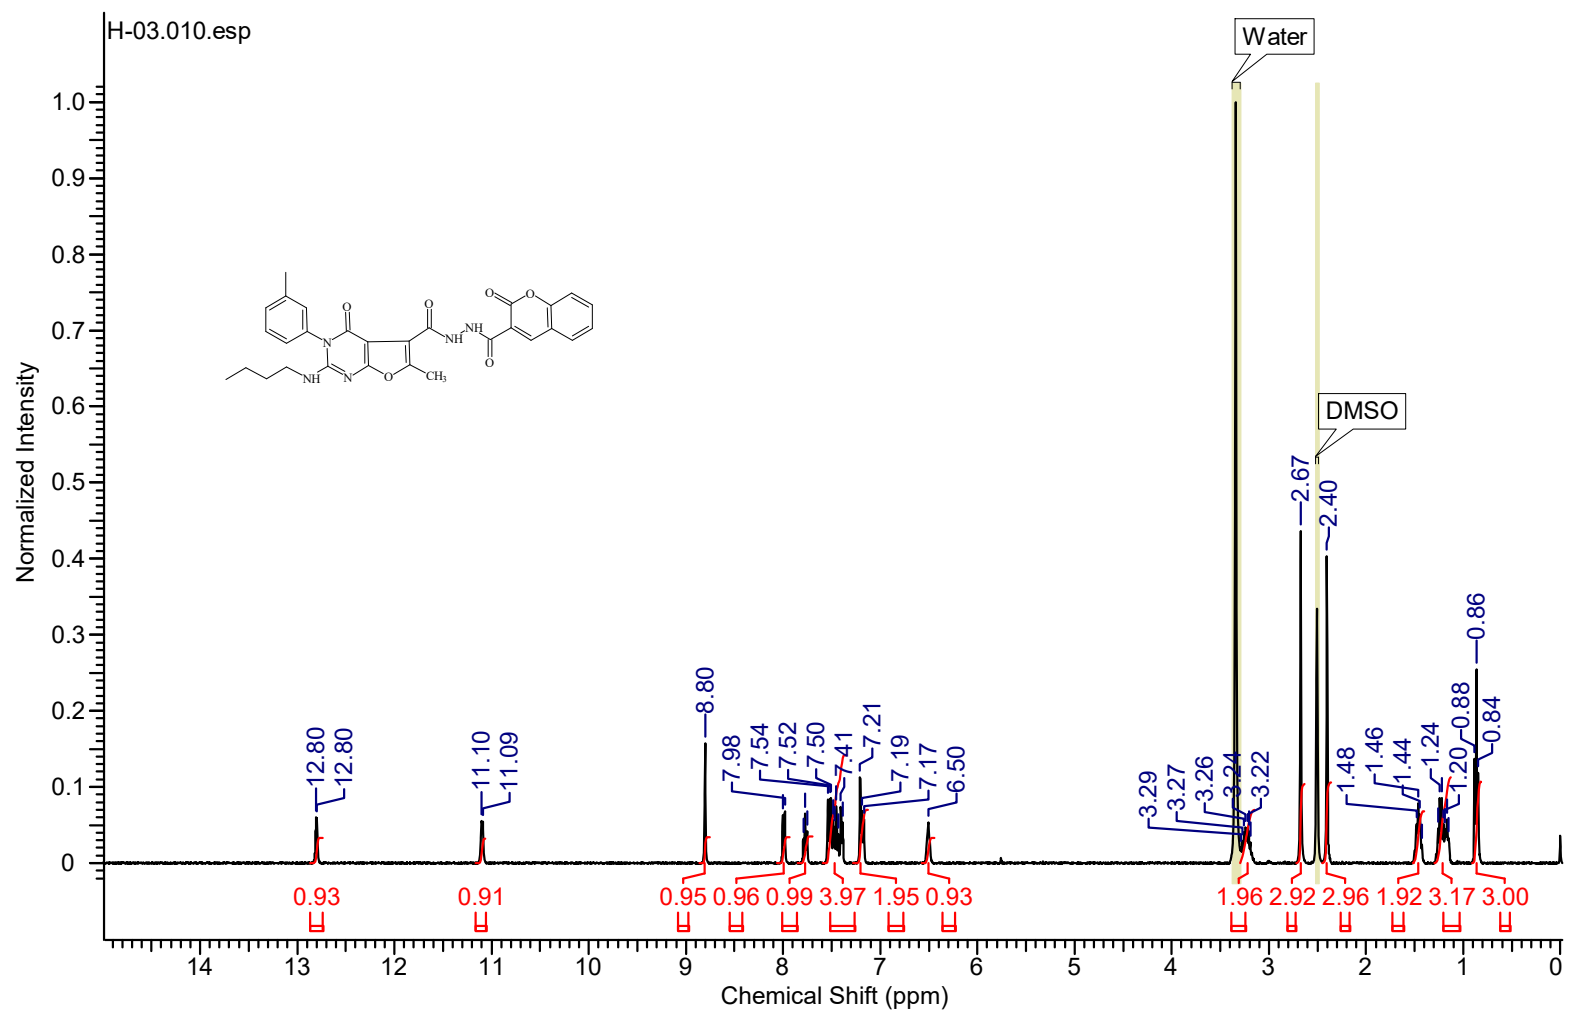

Fig.S47: <sup>1</sup>H NMR spectrum of compound 10h

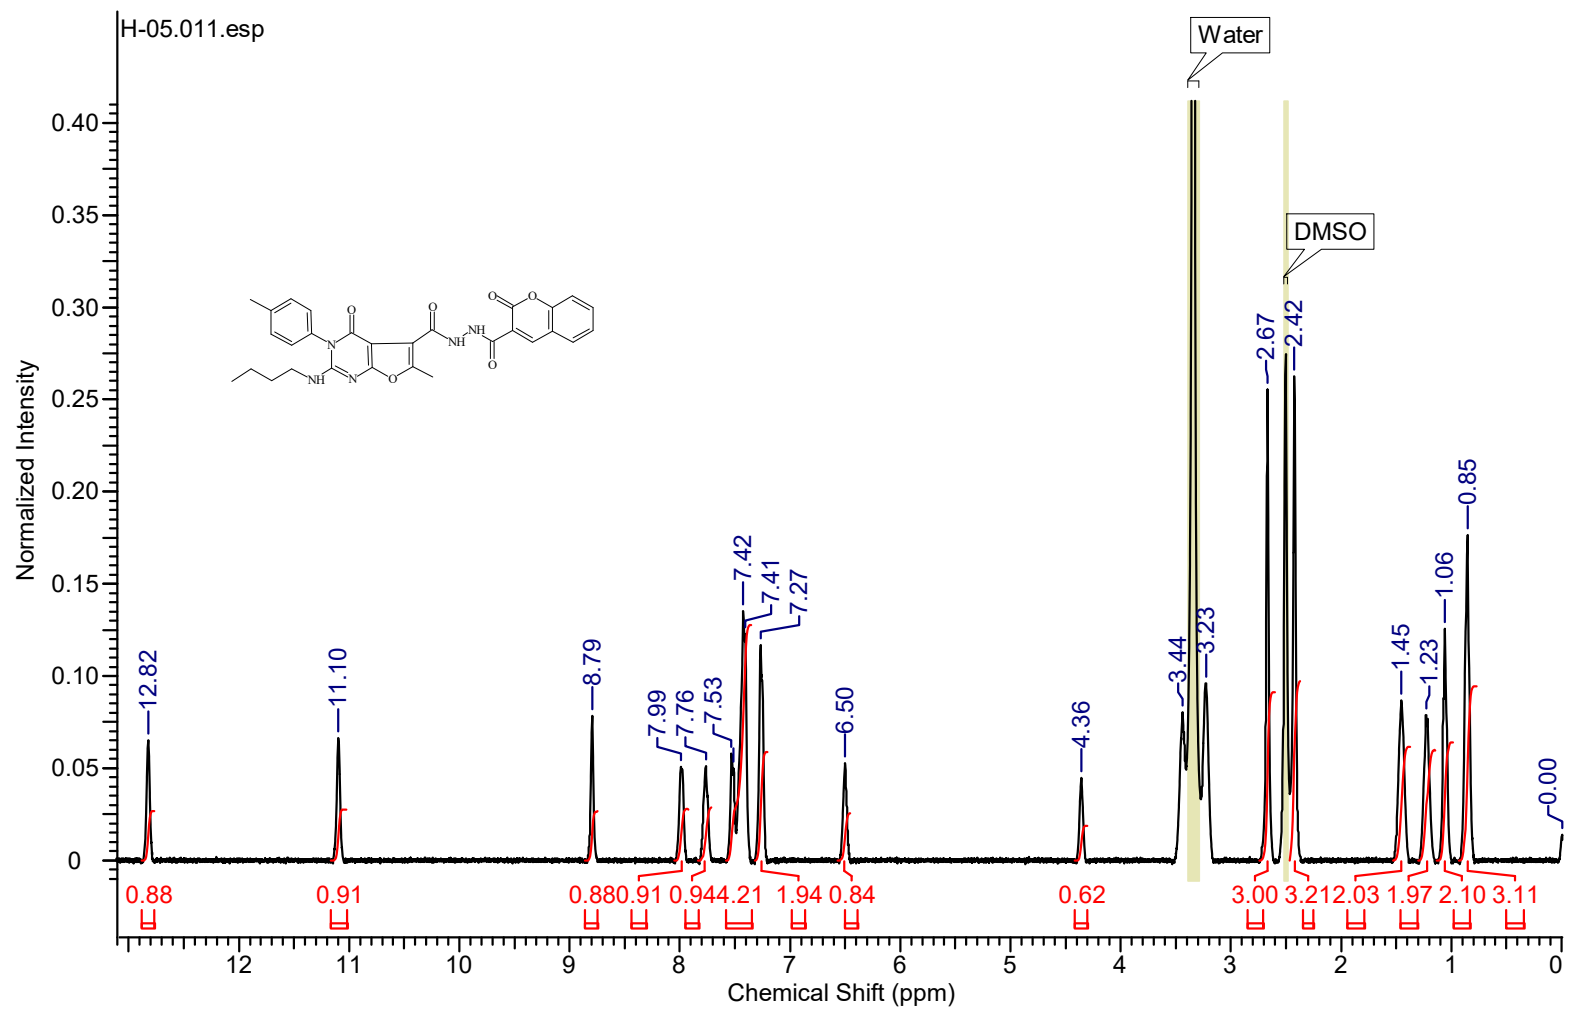

Fig.S48:  $^1\text{H}$  NMR spectrum of compound 10i

**$^{13}\text{C}$  NMR of Compounds 10a-i  
(Fig. S49-56)**

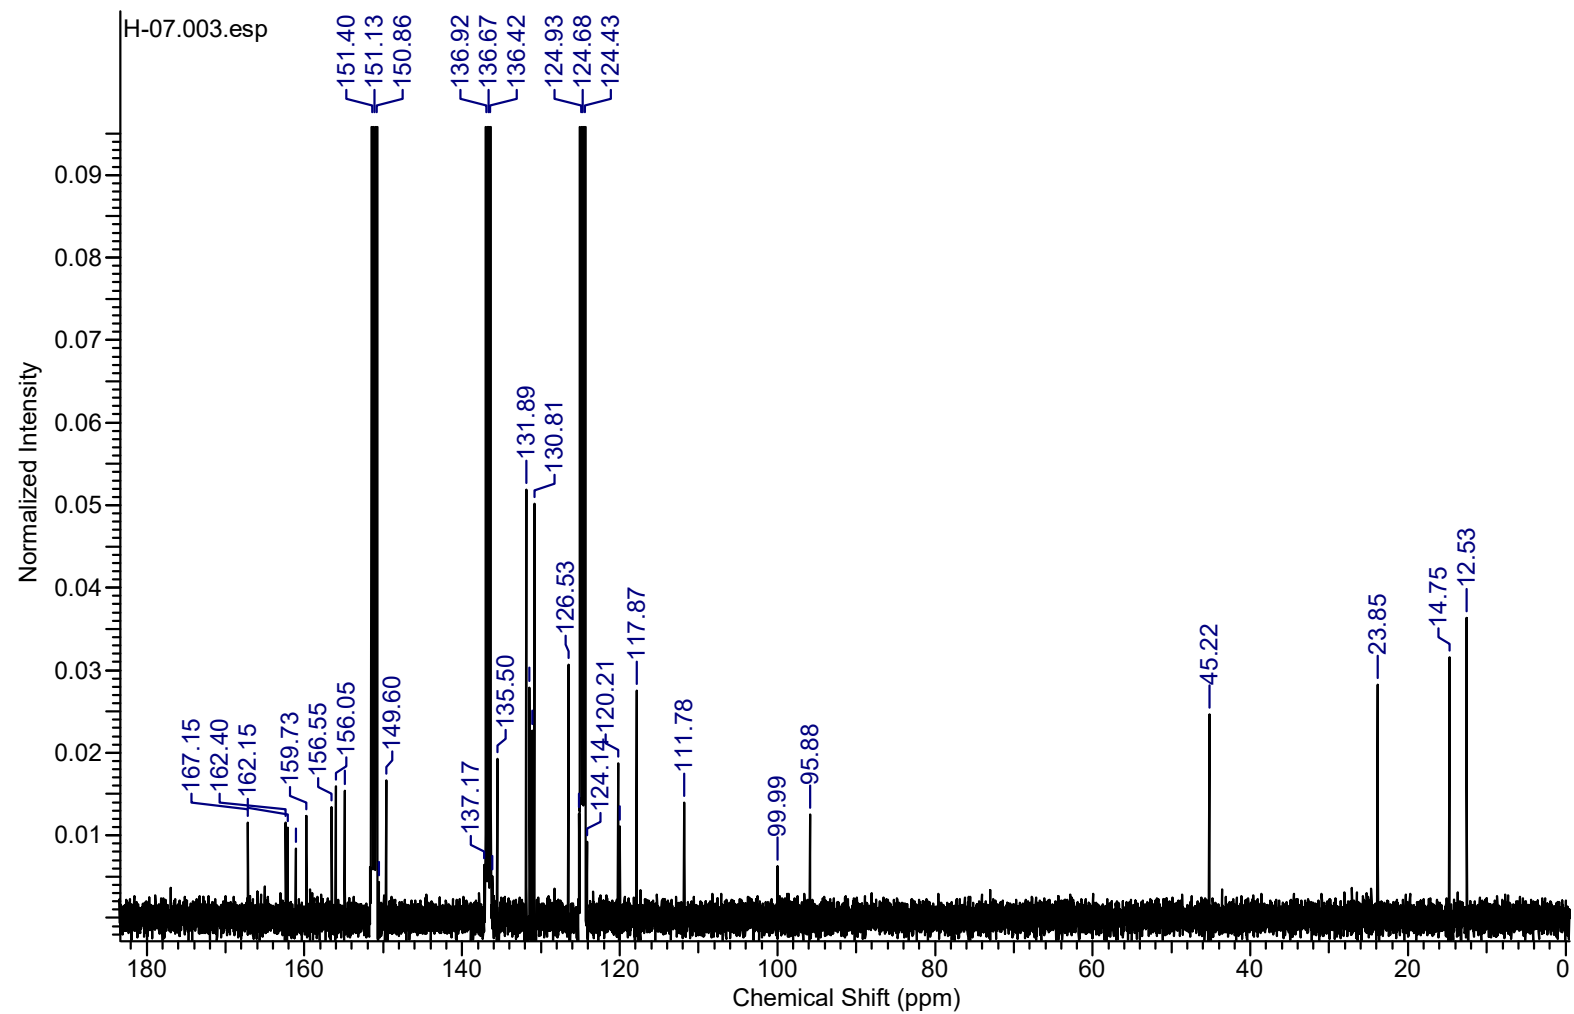

Fig.S49:  $^{13}\text{C}$  NMR spectrum of compound **10a**



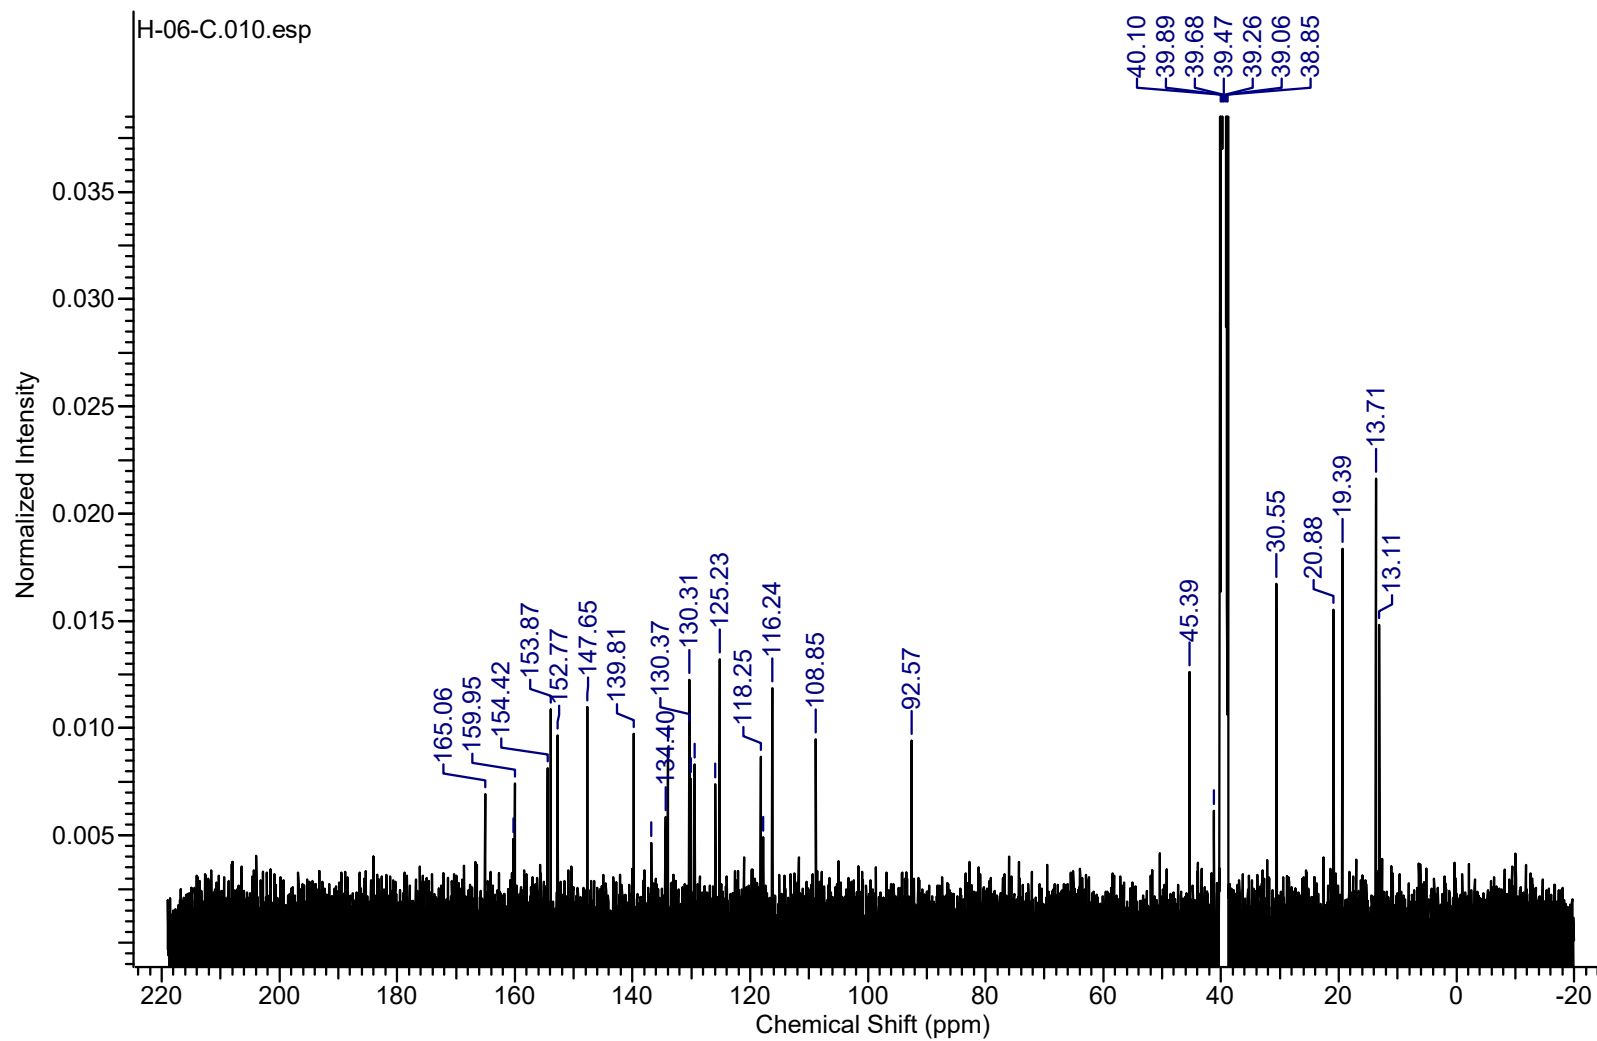

**Fig.S50:**  $^{13}\text{C}$  NMR spectrum of compound **10b**

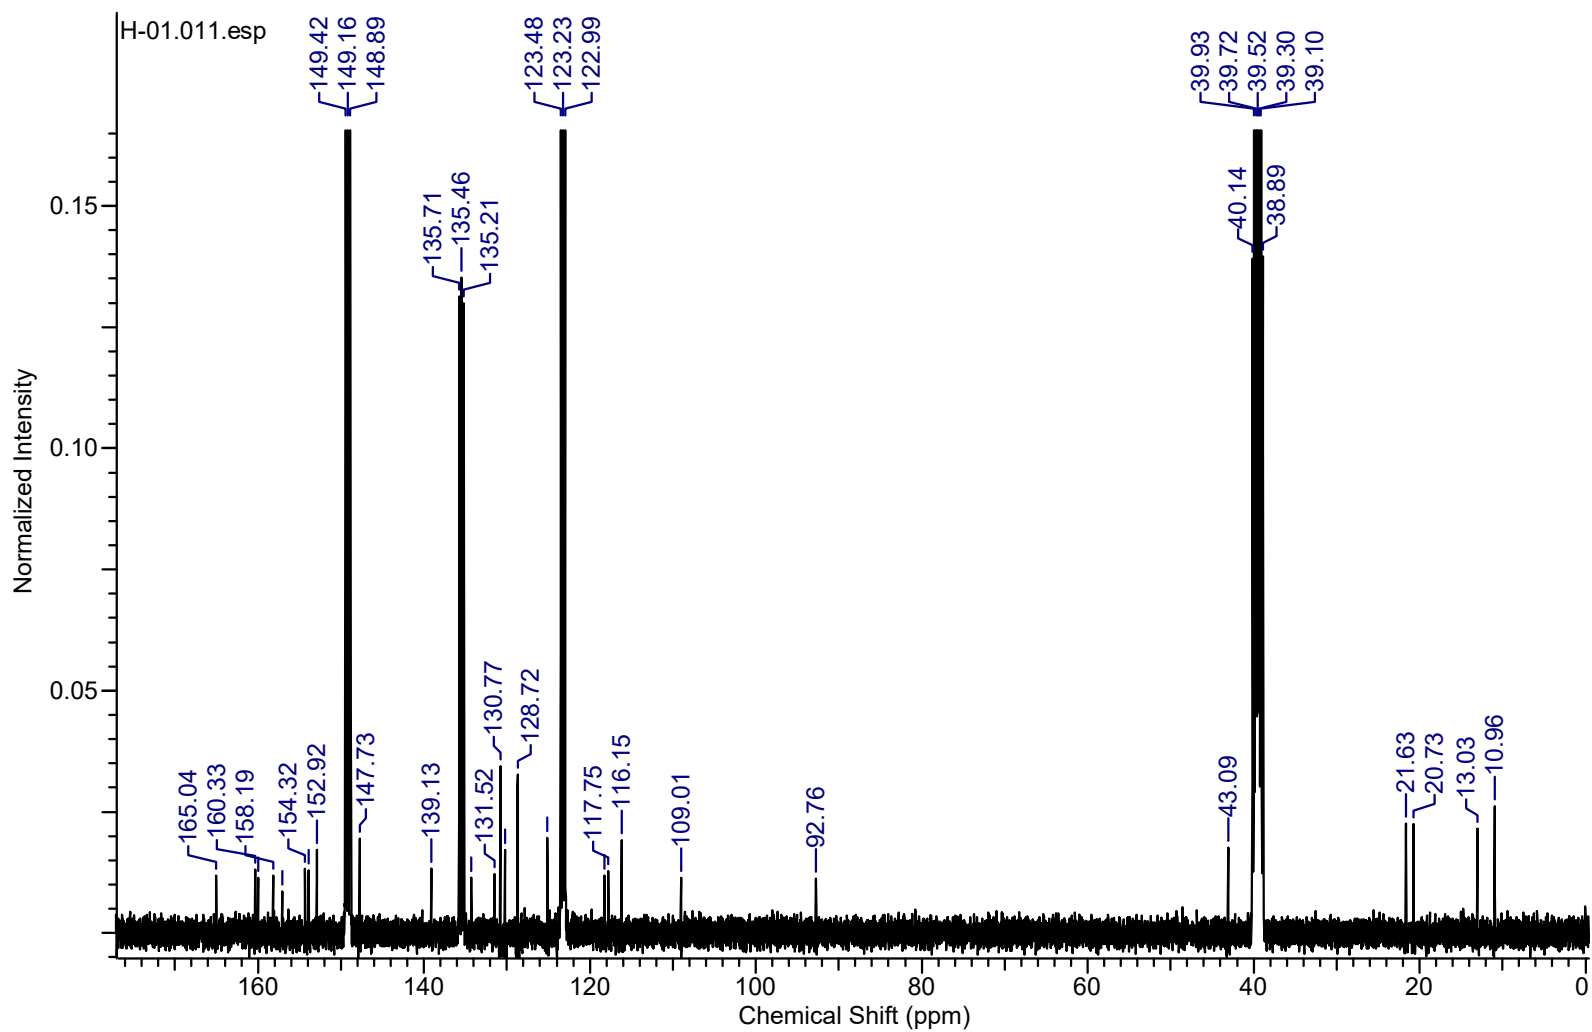

Fig.S51:  $^{13}\text{C}$  NMR spectrum of compound **10c**

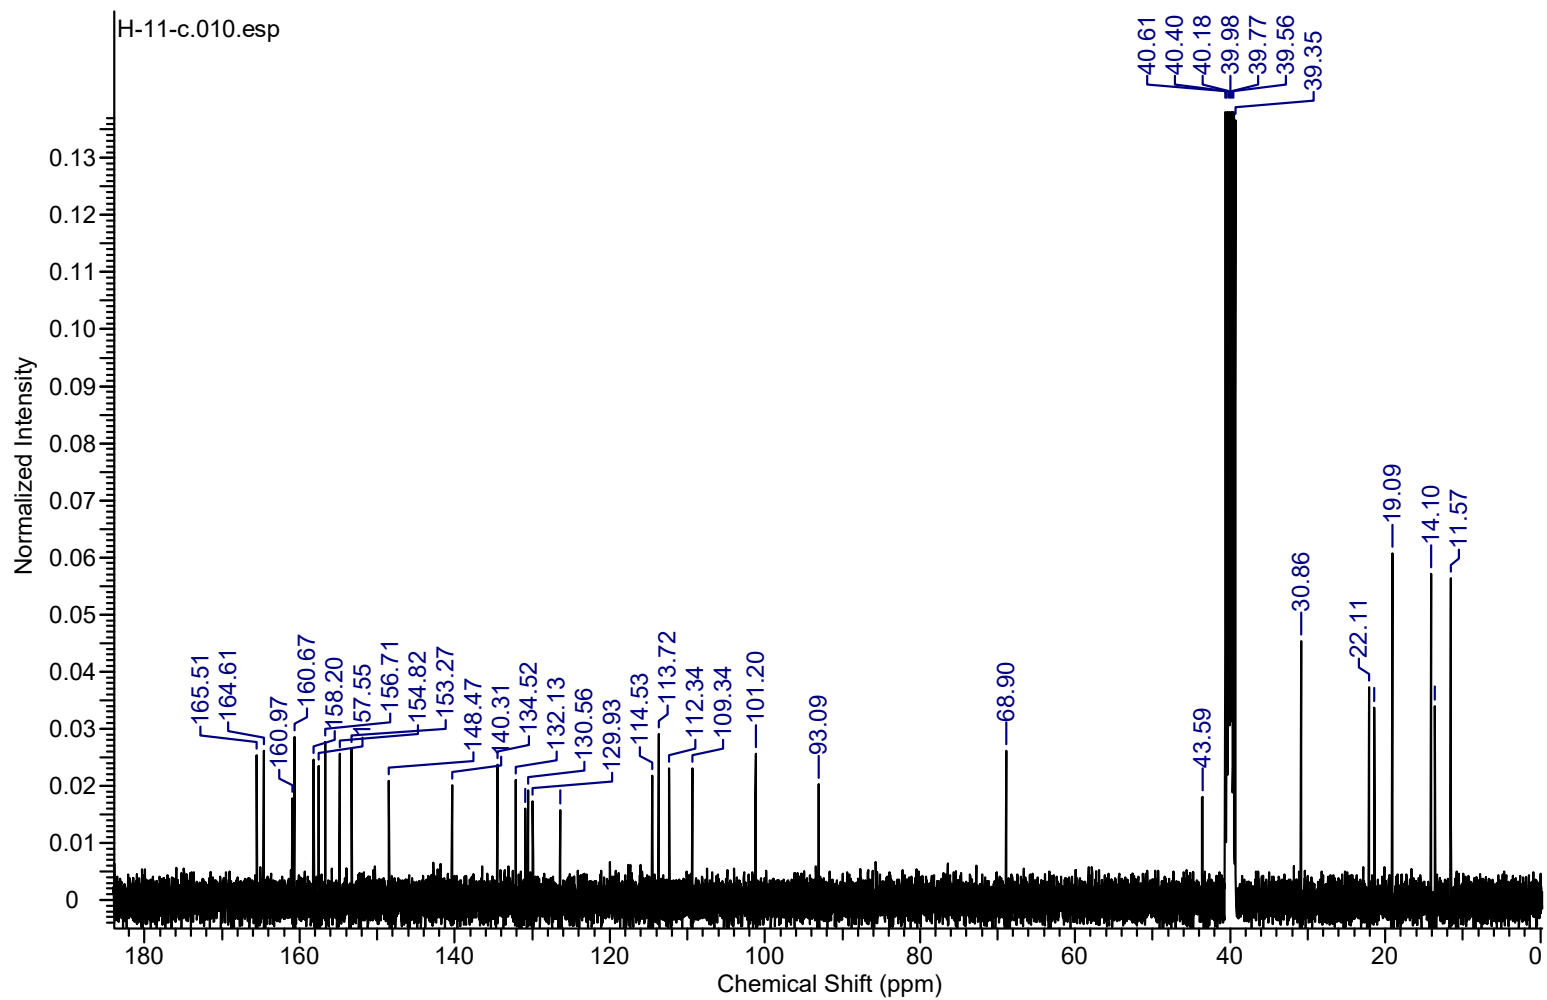

Fig.S52:  $^{13}\text{C}$  NMR spectrum of compound 10d

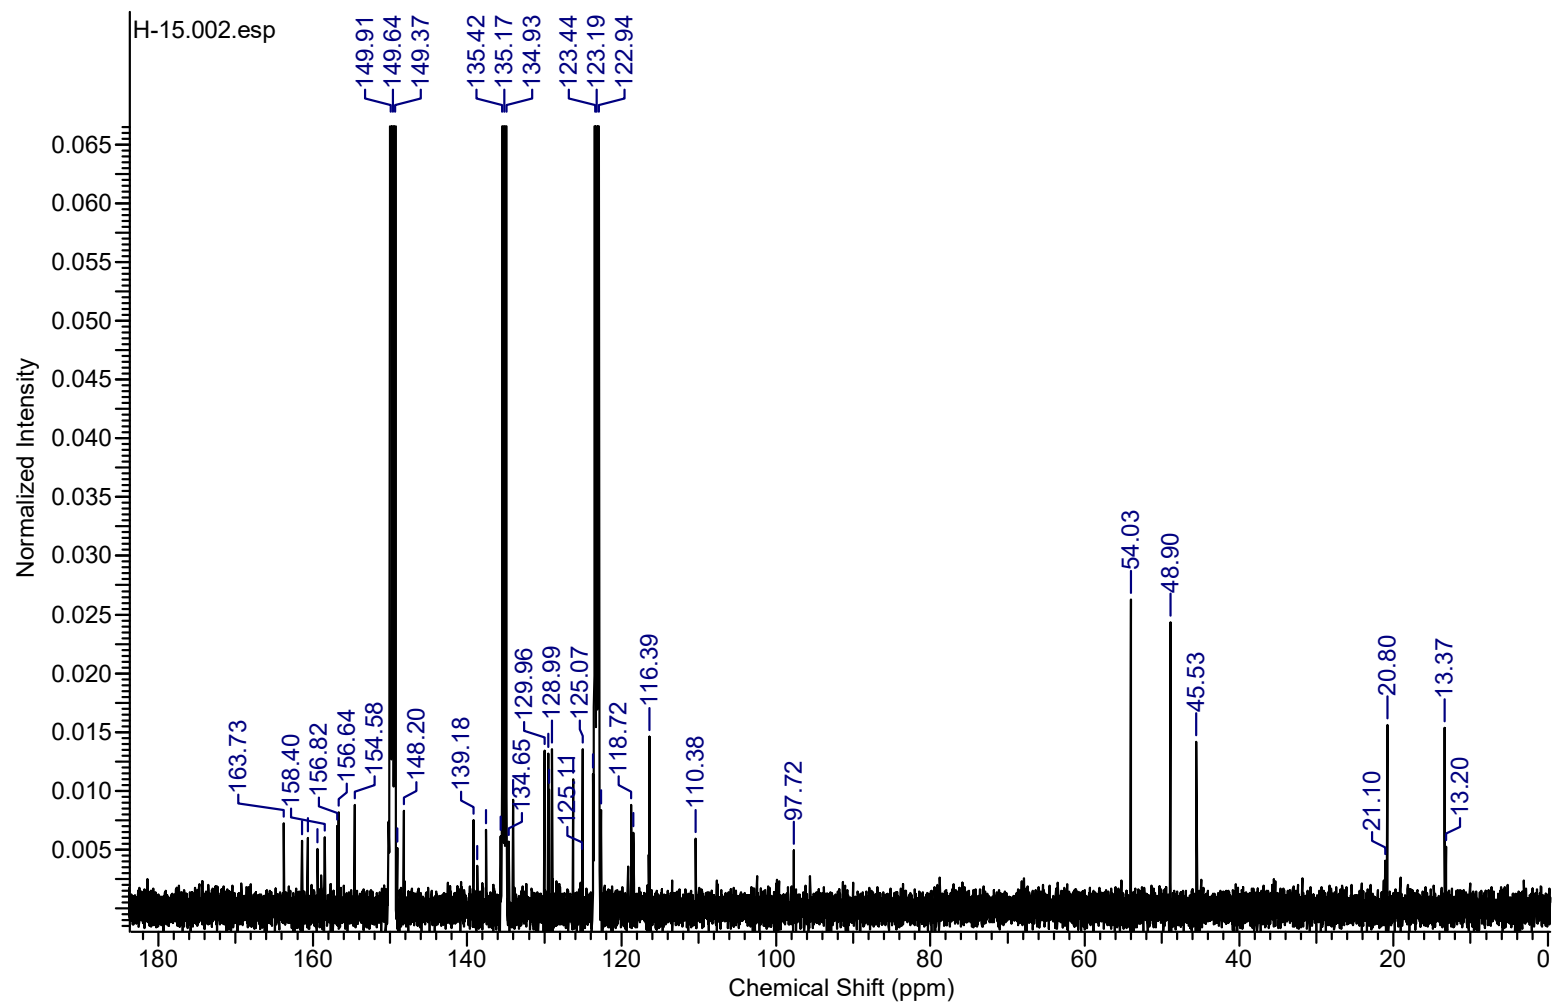

Fig.S53:  $^{13}\text{C}$  NMR spectrum of compound **10e**

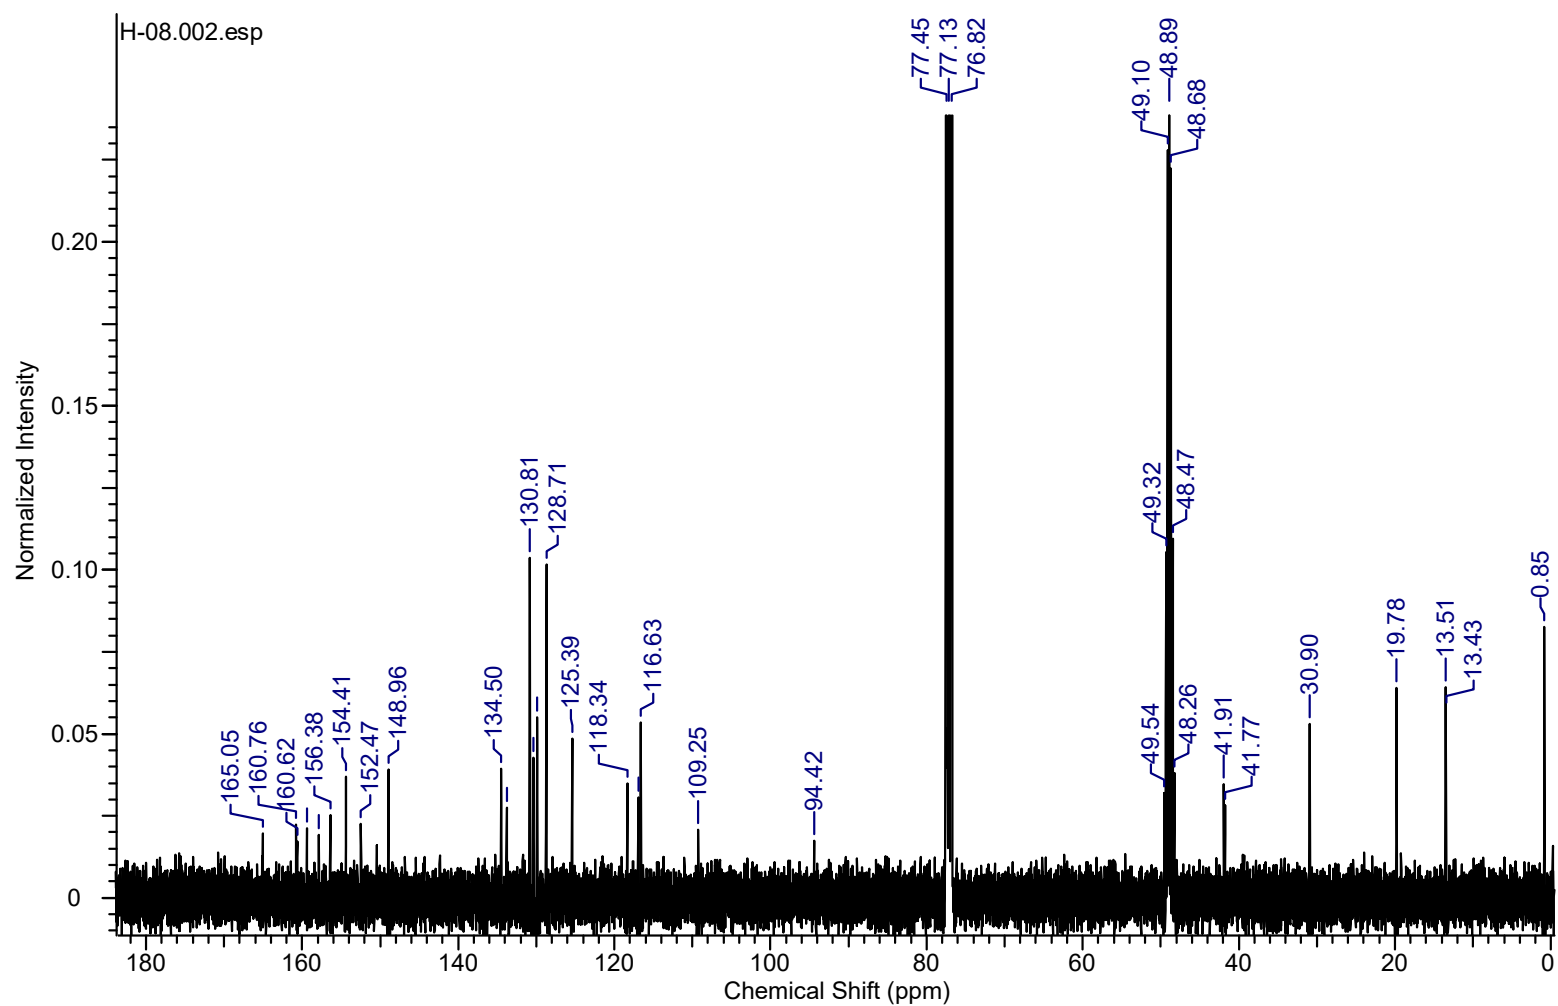

Fig.S54:  $^{13}\text{C}$  NMR spectrum of compound **10g**

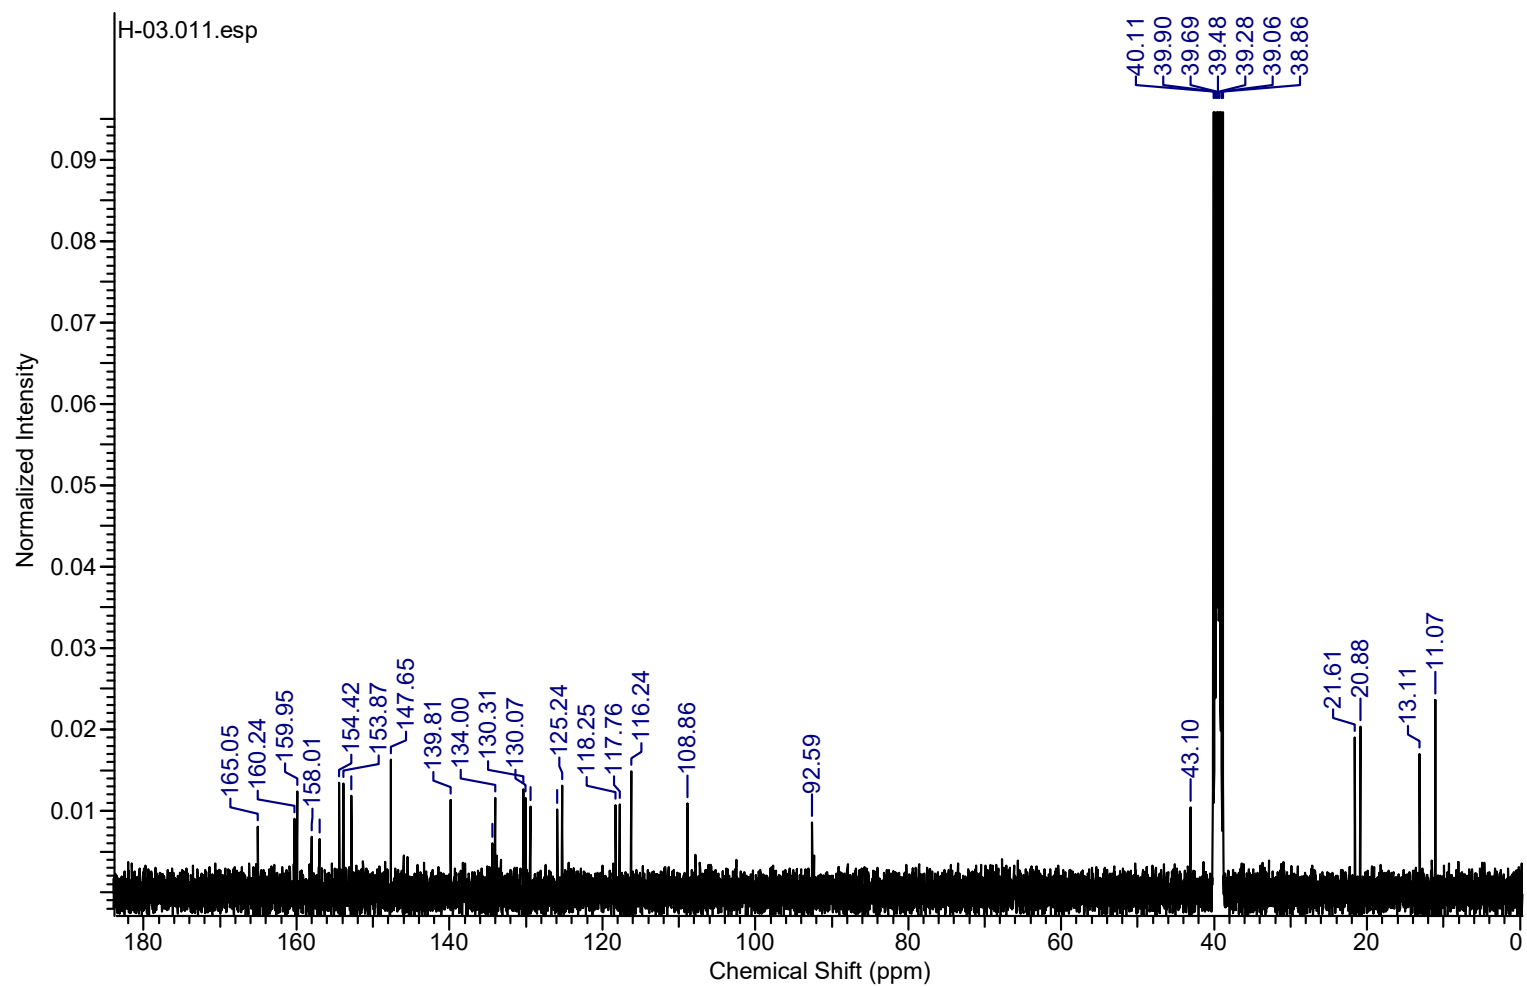

Fig.S55:  $^{13}\text{C}$  NMR spectrum of compound 10h

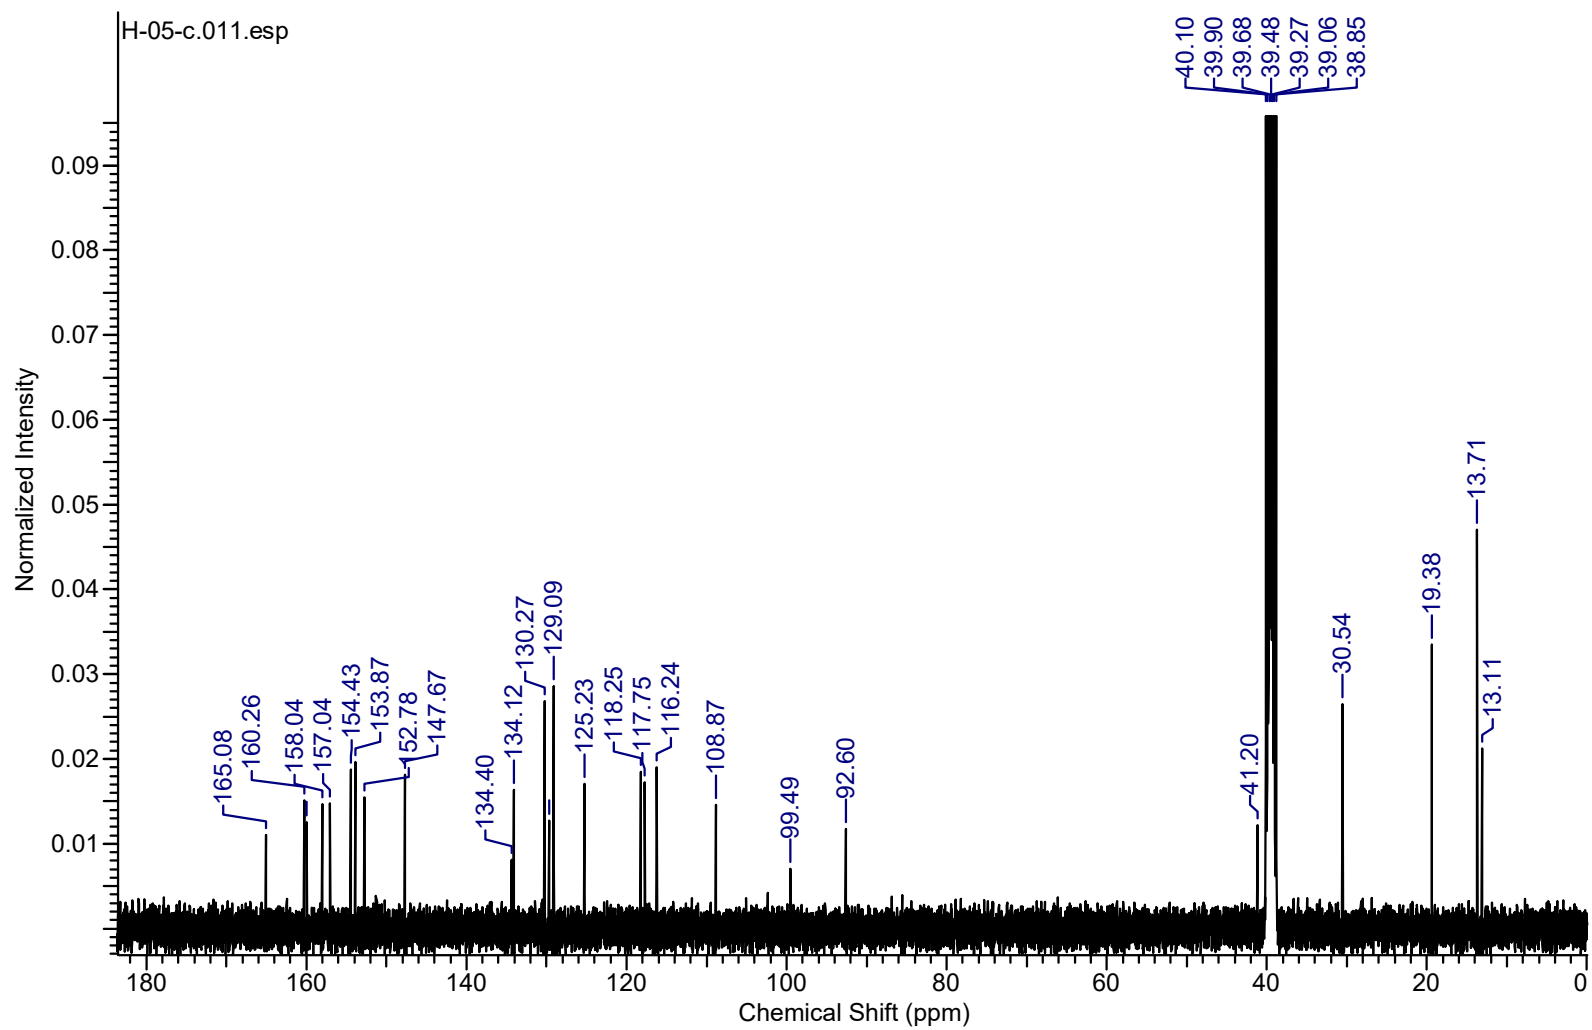

Fig.S56:  $^{13}\text{C}$  NMR spectrum of compound **10i**

**ESI-MS of Compounds 10a-n**  
**(Fig. S57-71)**



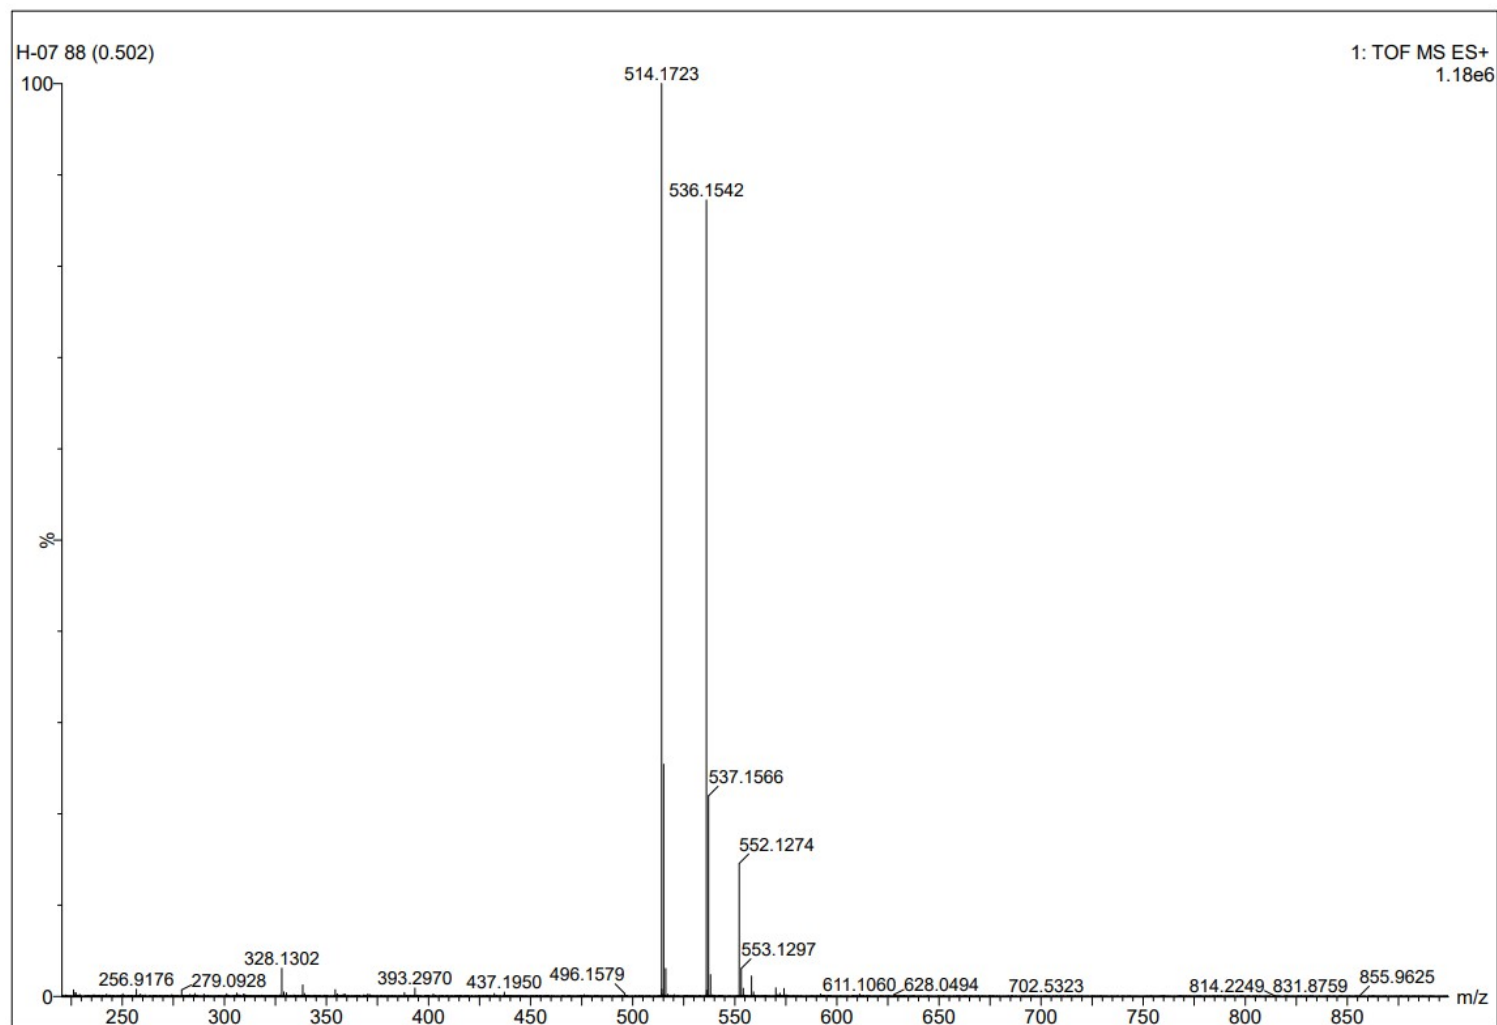

**Fig.S57:** HRESI-MS spectrum of compound **10a**

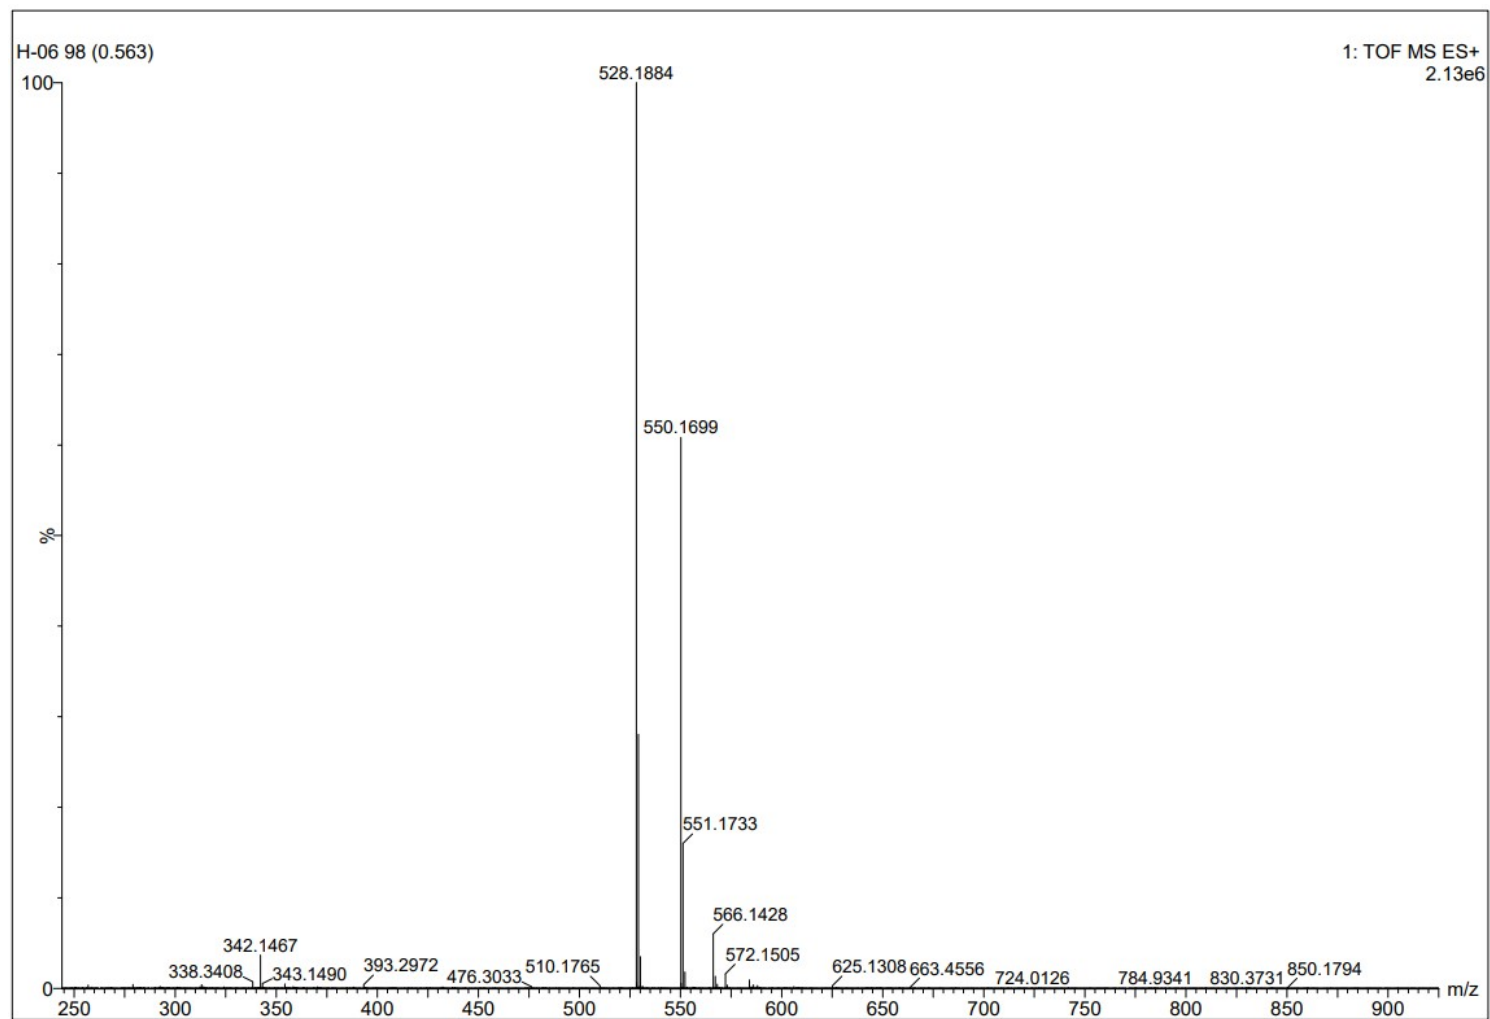

**Fig.S58:** HRESI-MS spectrum of compound **10b**

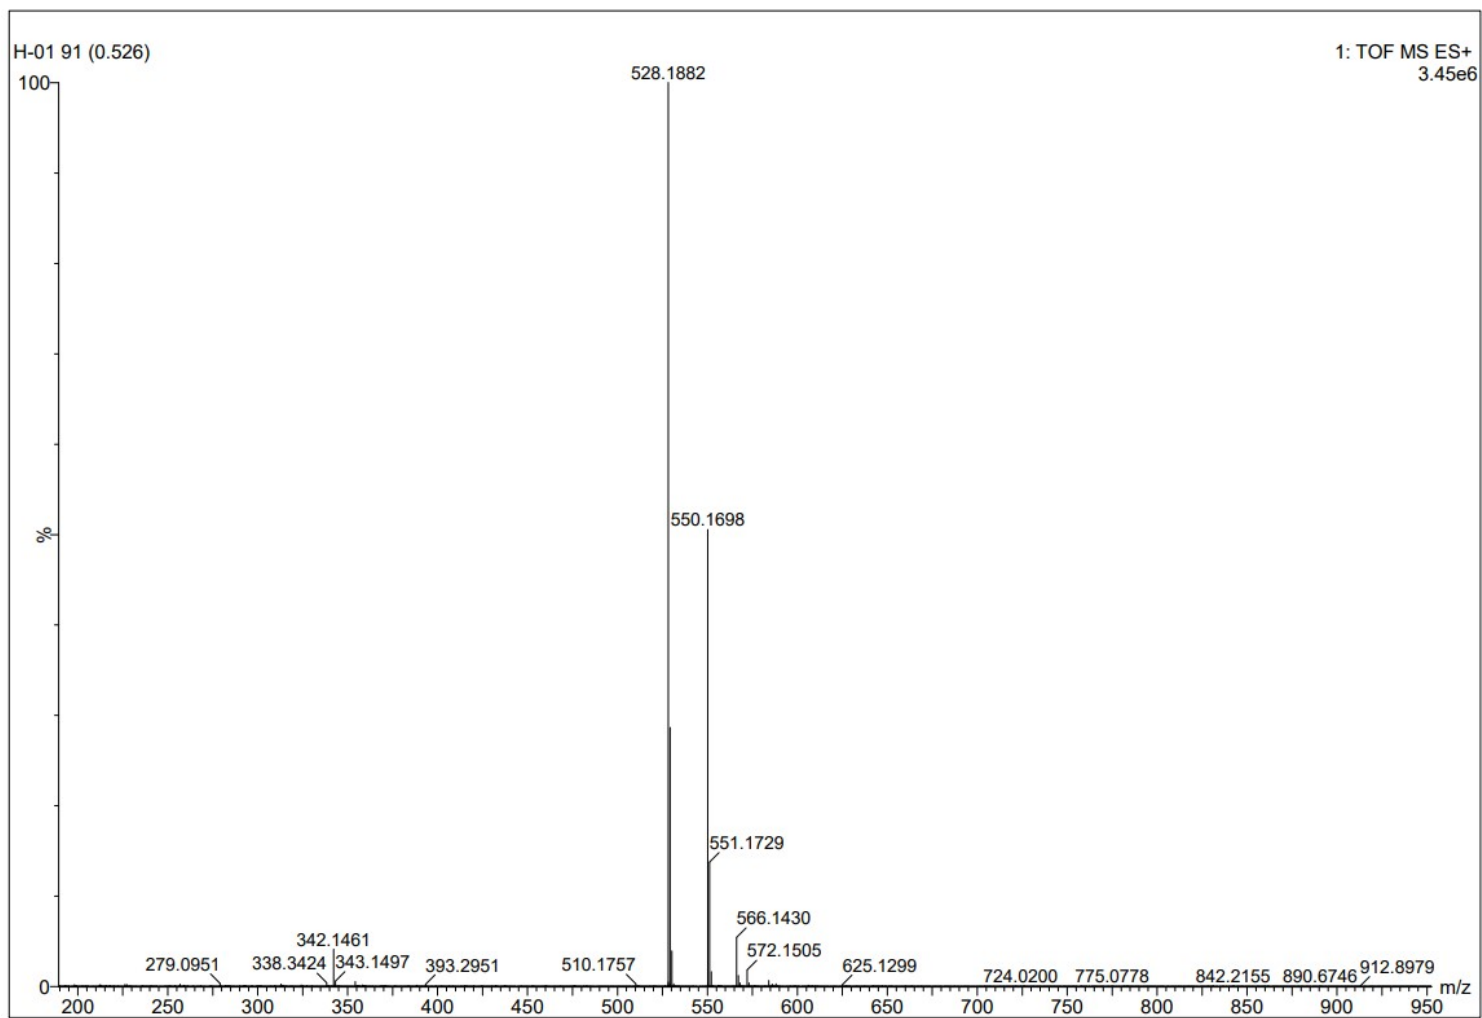

**Fig.S59:** HRESI-MS spectrum of compound **10c**

#33 RT: 0.16 AV: 1 NL: 6.03E6  
T: -c ESI Q1MS [400.000-700.000]

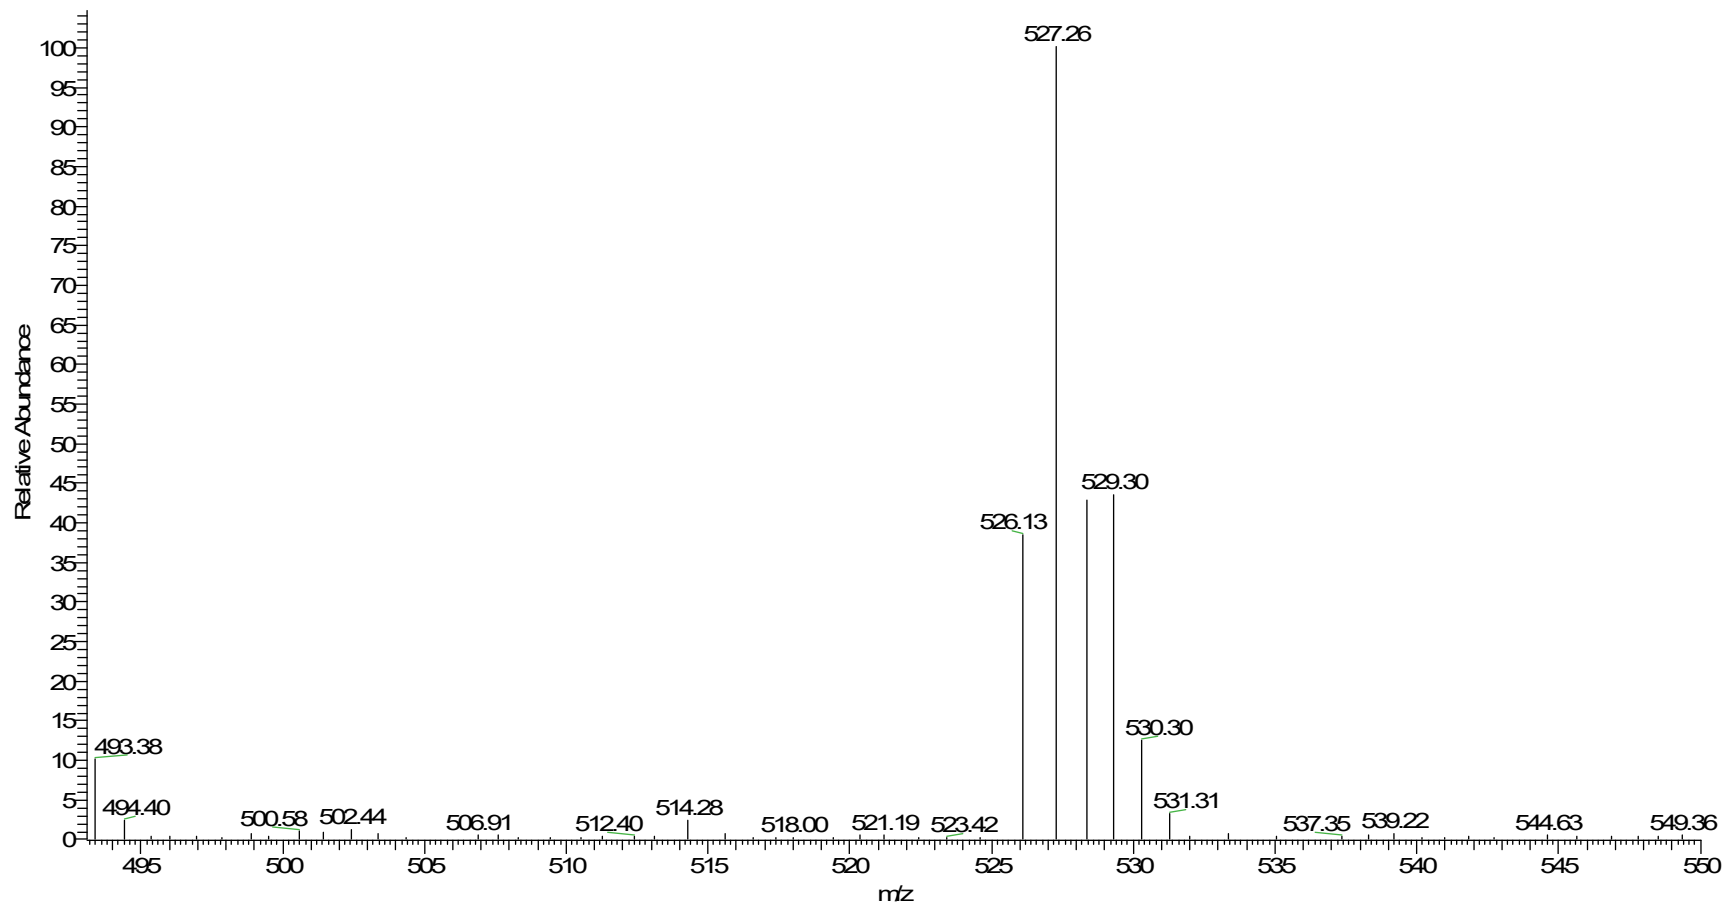

Fig.S60: ESI-MS spectrum of compound 10c

2-#8 RT: 0.04 AV: 1 NL: 3.59E6  
T: -cESI Q1MS [400.000-700.000]

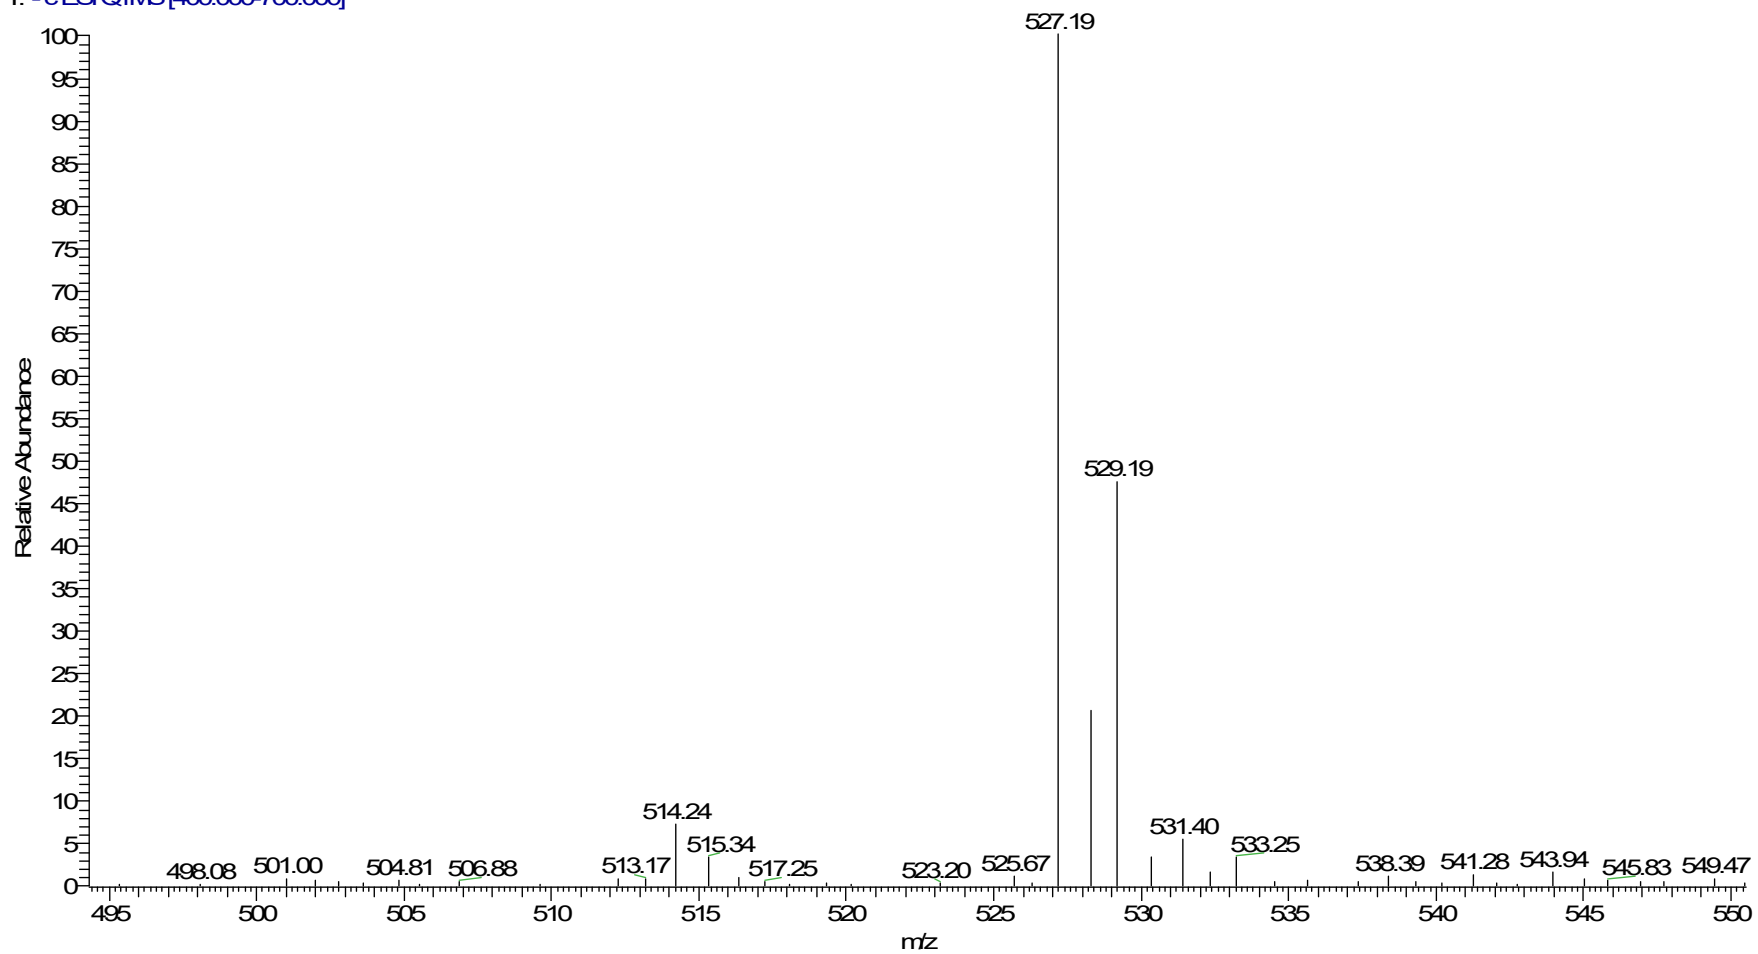

Fig.S61: ESI-MS spectrum of compound 10d

H04\_20191209042033 #29 RT: 0.14 AV: 1 NL: 1.42E8  
T: +c ESI Q1MS [400.000-700.000]

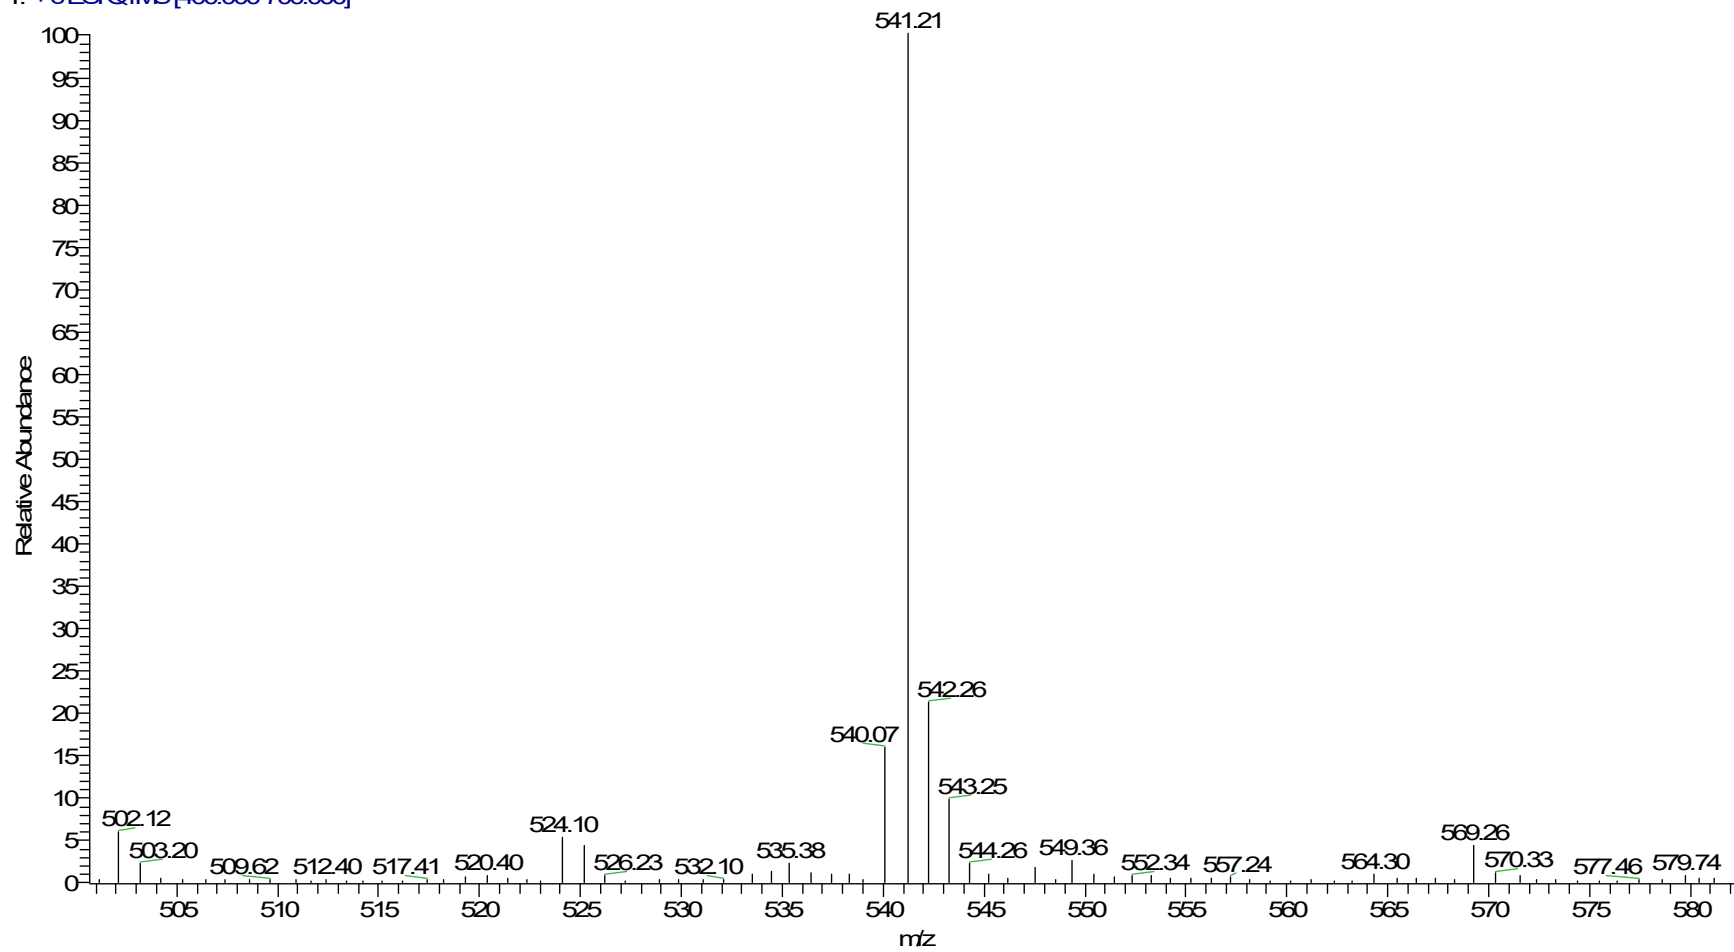

Fig.S62: ESI-MS spectrum of compound 10e

H03 #28 RT: 0.09 AV: 1 NL: 2.33E7  
T: +c ESI Q1MS [450.000-650.000]

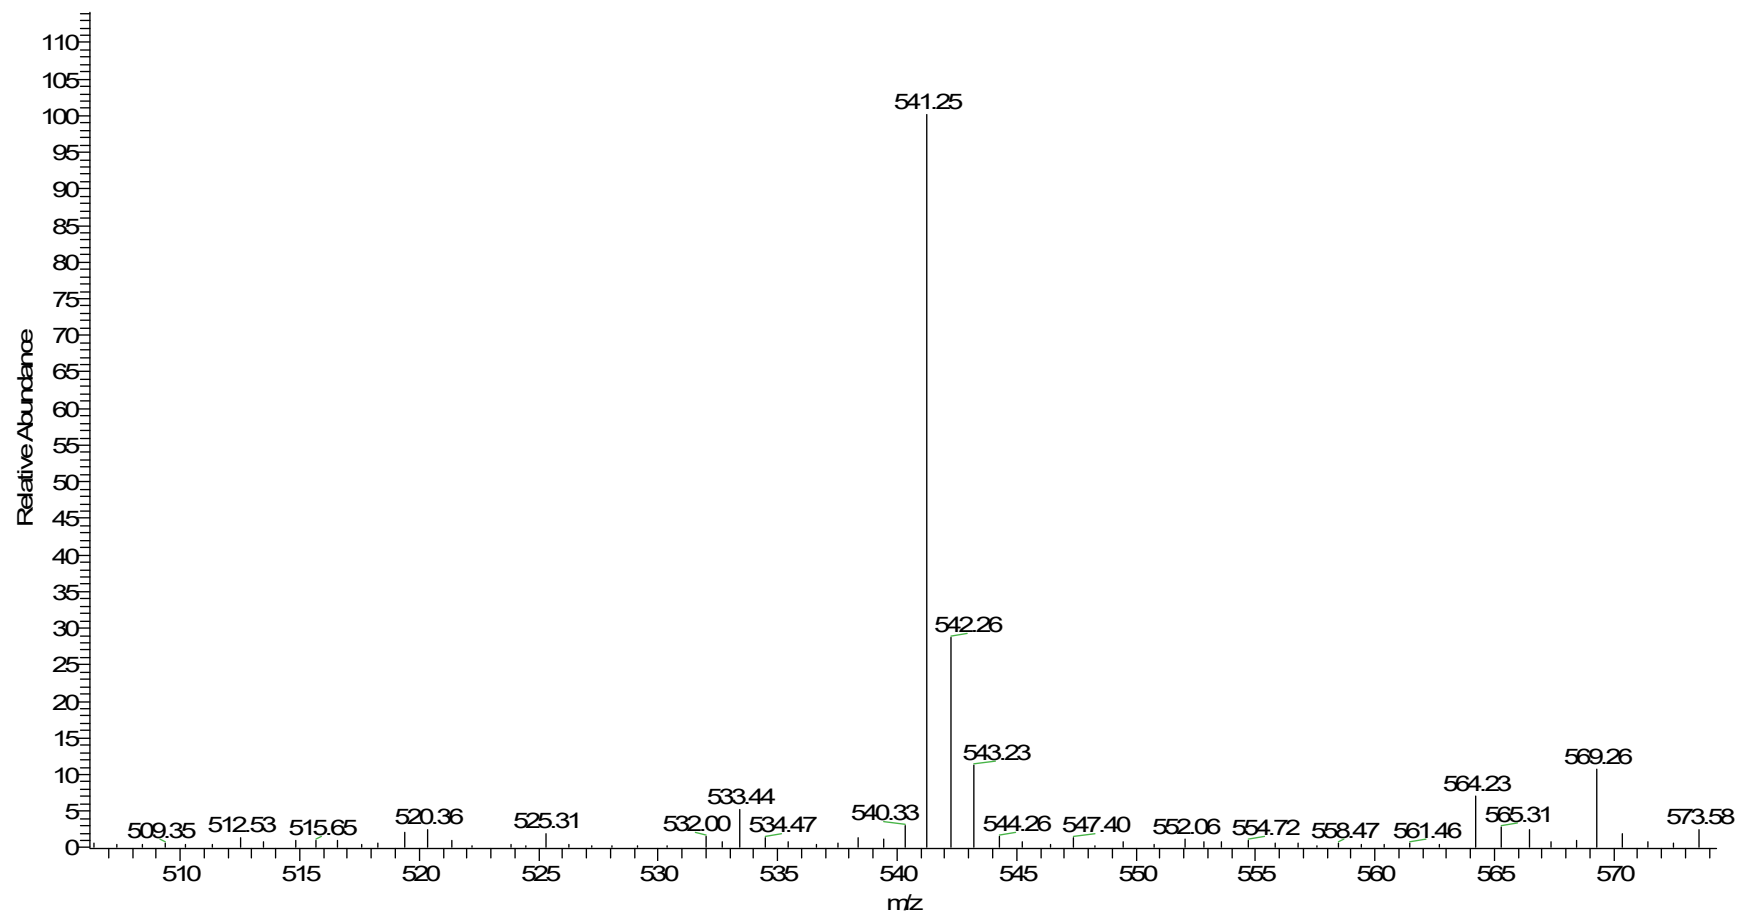

Fig.S63: ESI-MS spectrum of compound 10f

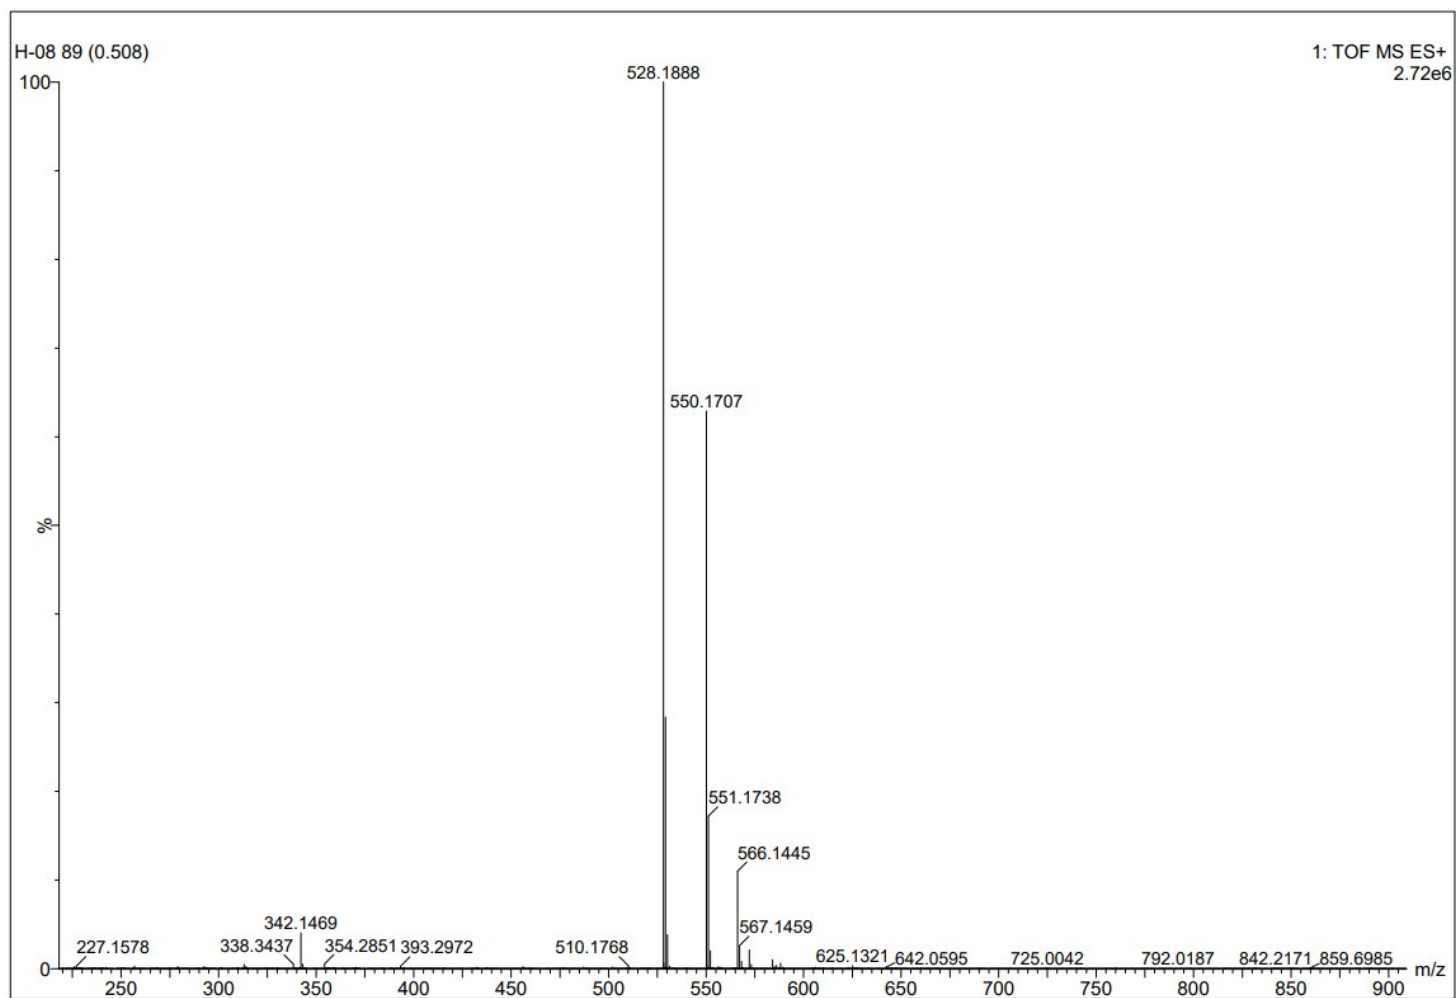

**Fig.S64:** HRESI-MS spectrum of compound **10g**



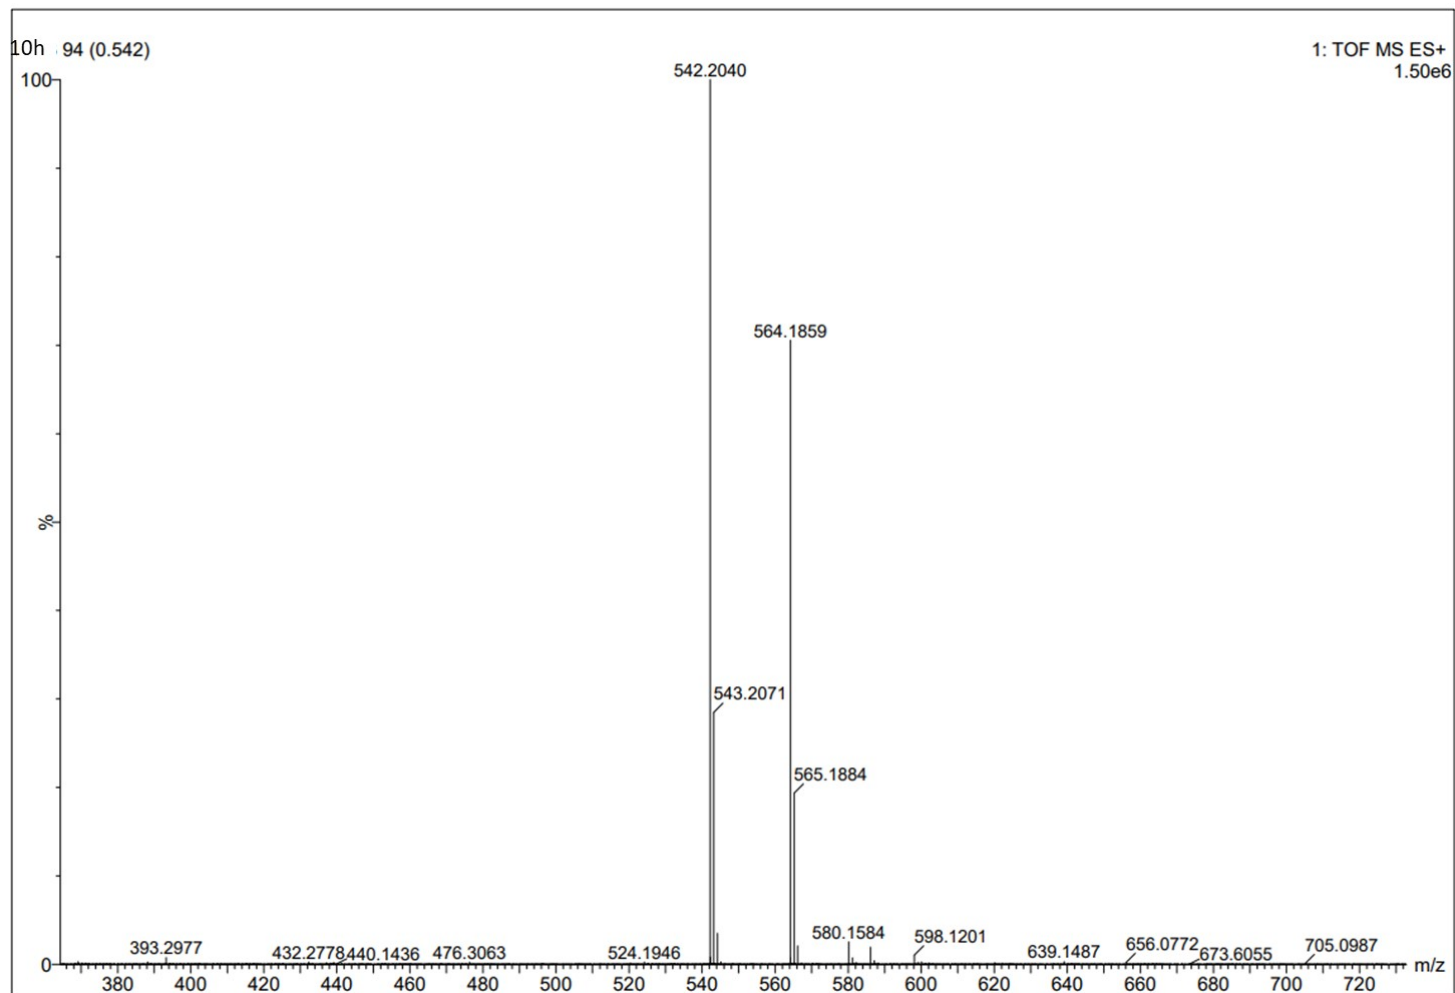

**Fig.S65: HRESI-MS spectrum of compound 10h**

#20 RT: 0.10 AV: 1 NL: 4.93E7  
T: +cESI Q1MS [400.000-700.000]

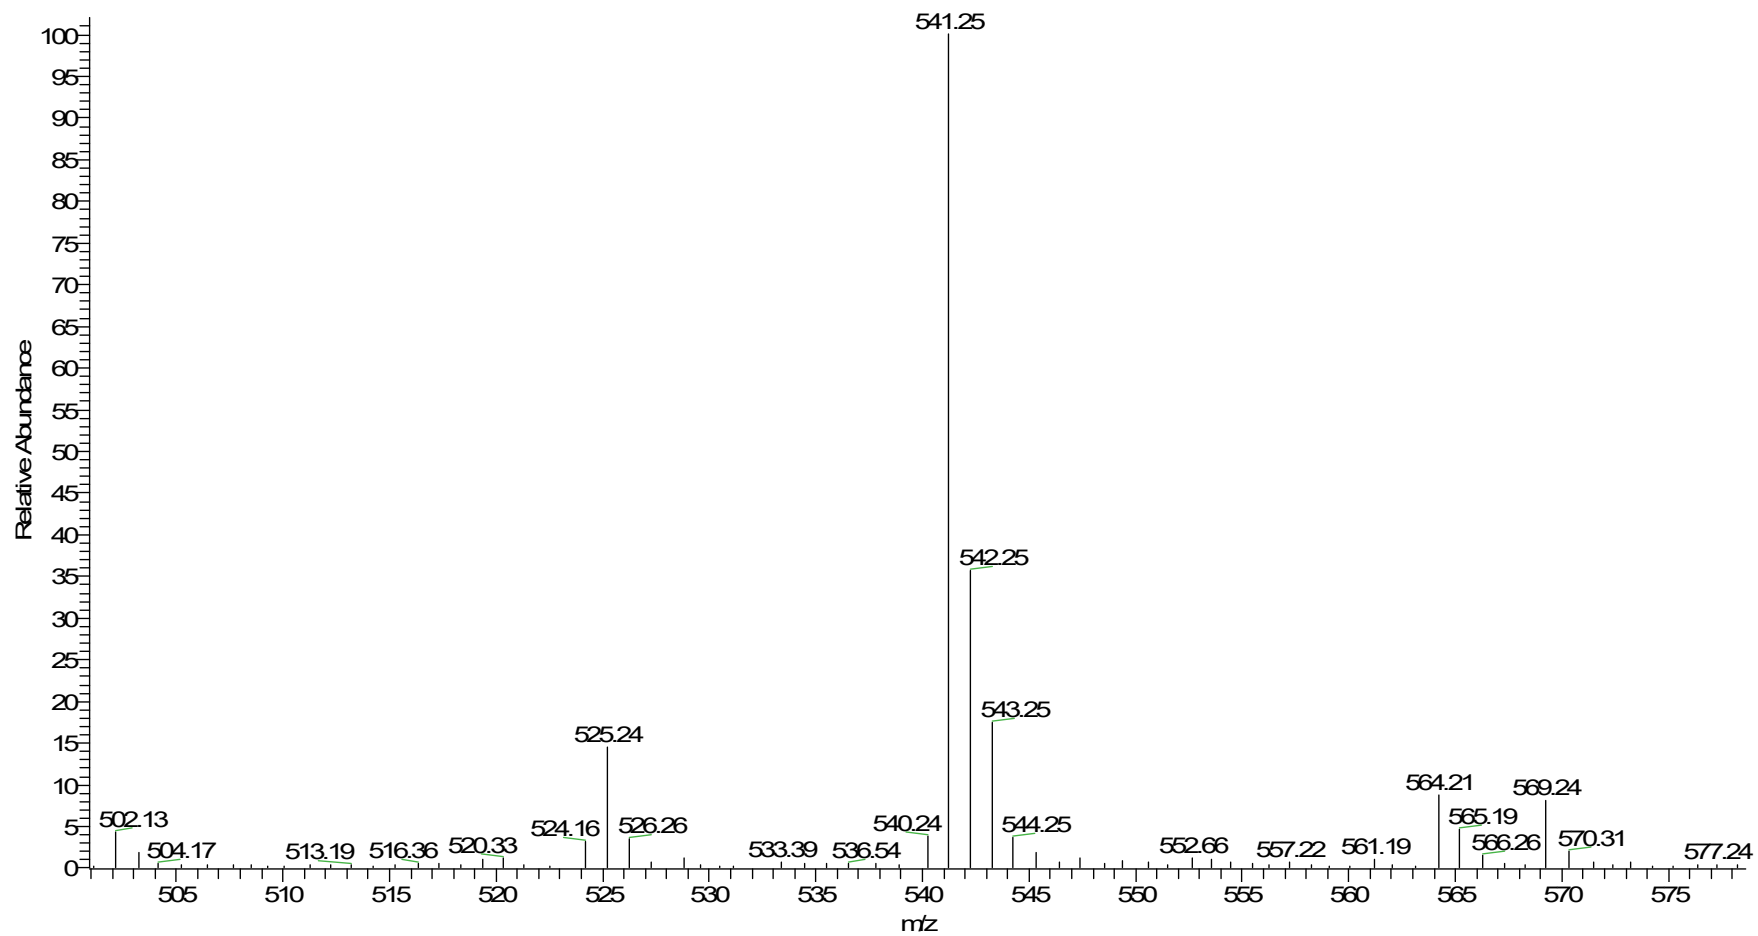

Fig.S66: ESI-MS spectrum of compound 10j

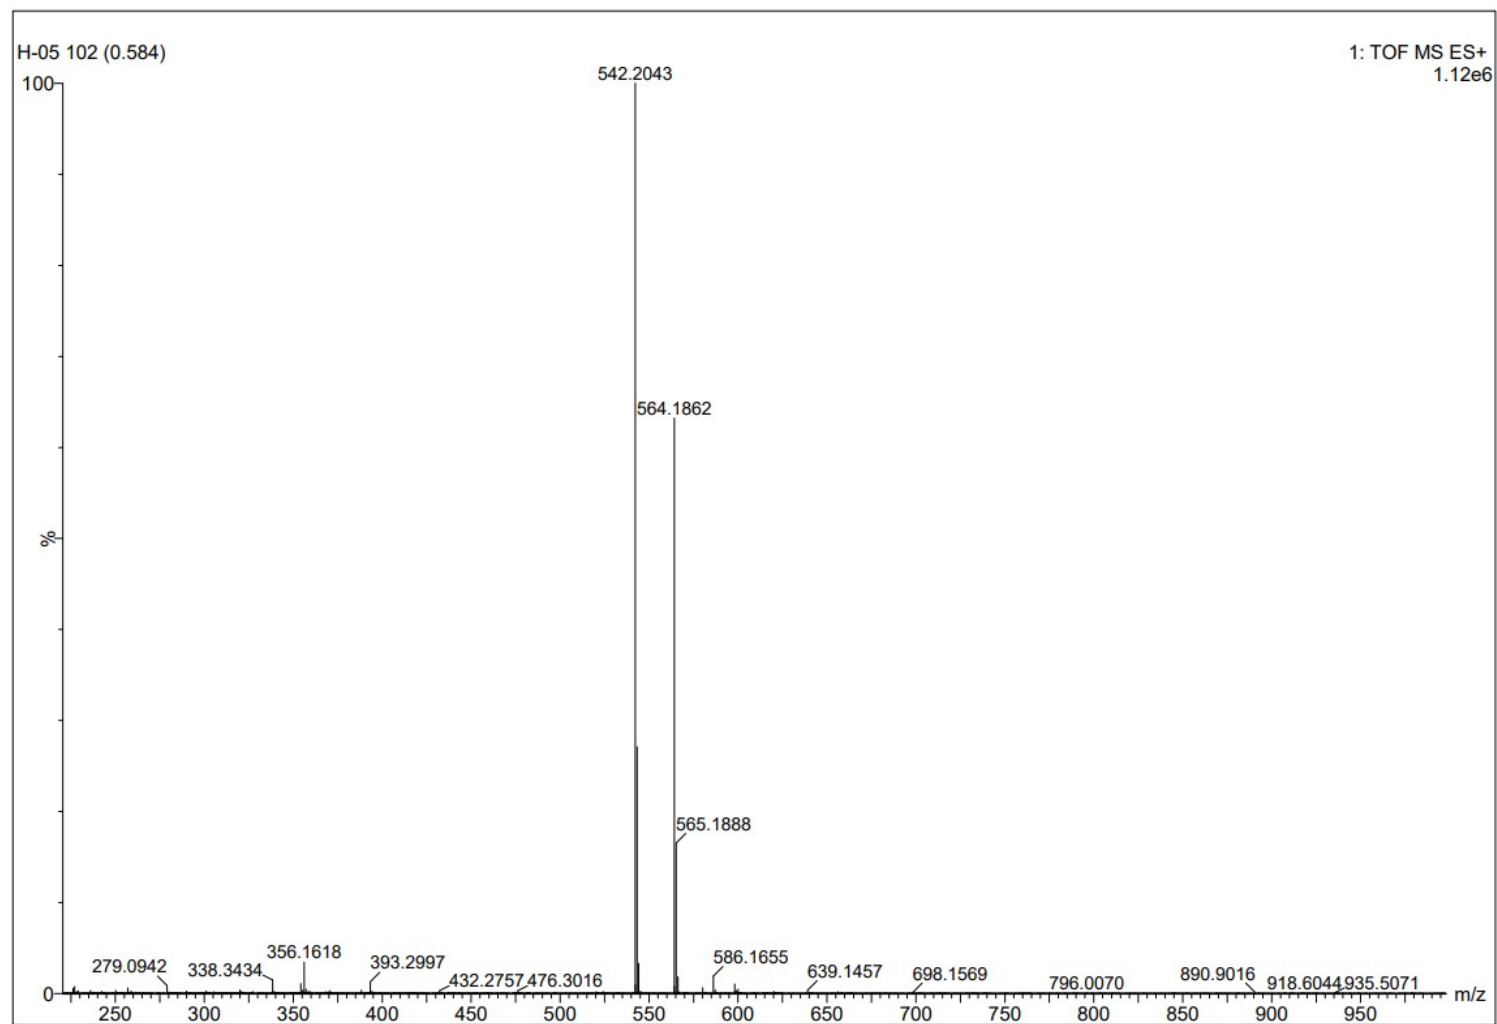

**Fig.S67:** HRESI-MS spectrum of compound **10i**

3-#4 RT: 0.02 AV: 1 NL: 242E7  
T: +cESI Q1MS [400.000-700.000]

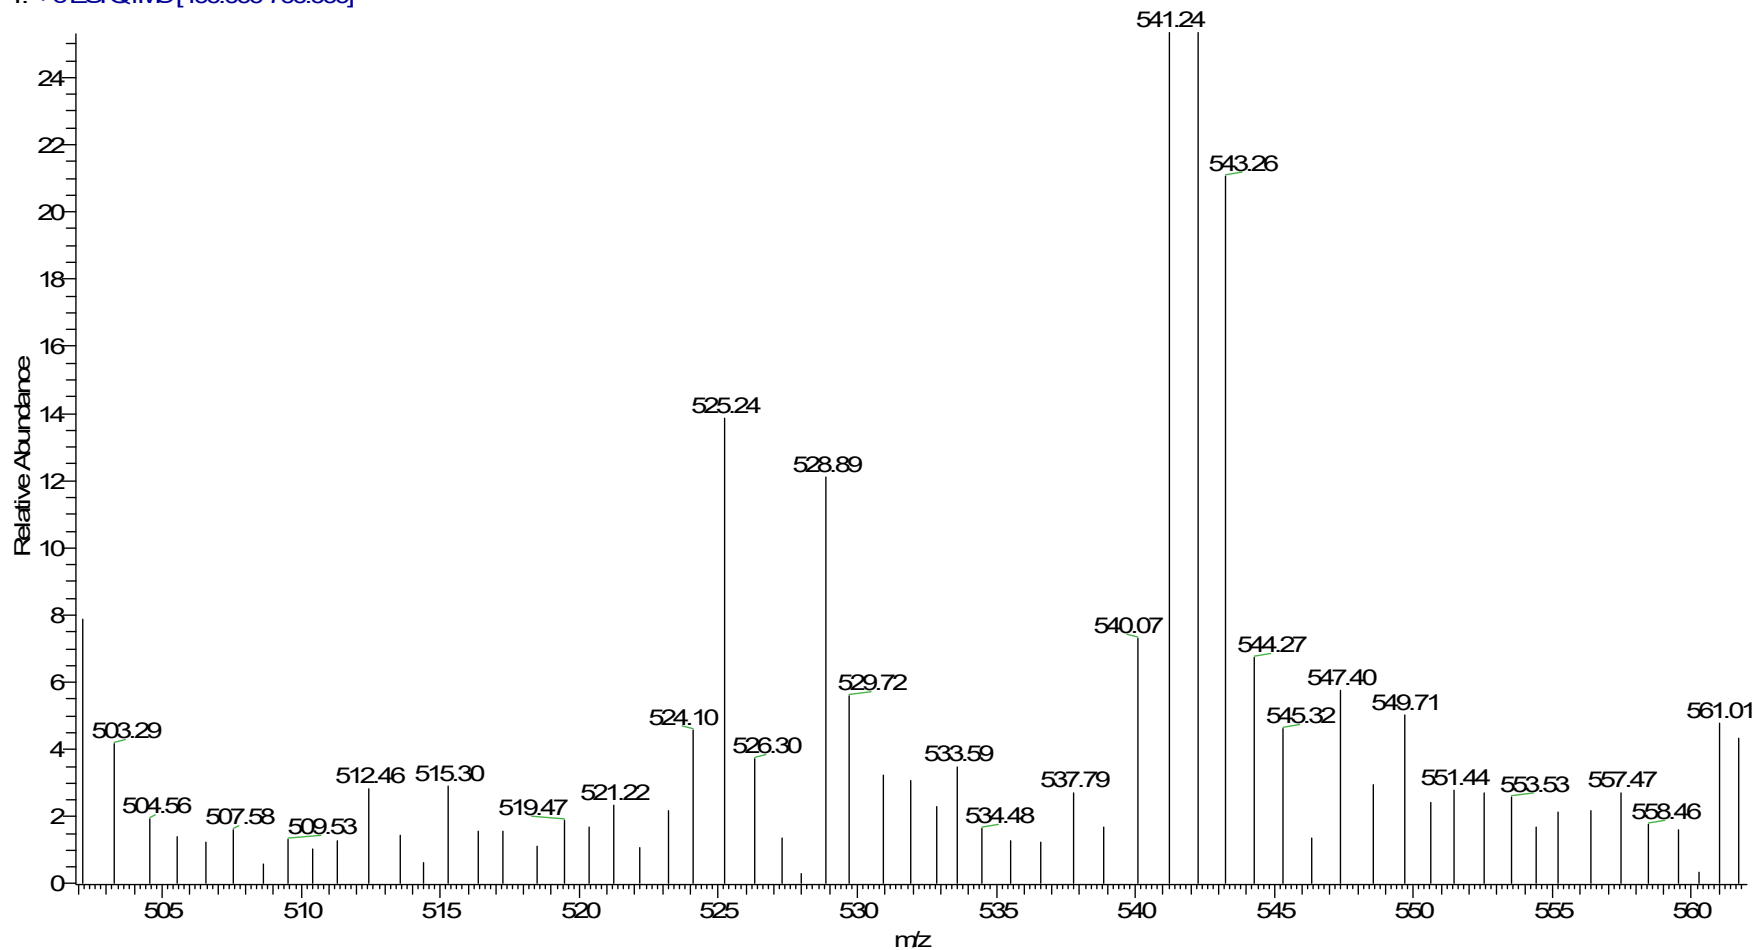

Fig.S68: ESI-MS spectrum of compound 10i

H-1C #159 RT: 0.80 AV: 1 NL: 2.77E7  
T: +cESI Q1MS [400.000-700.000]

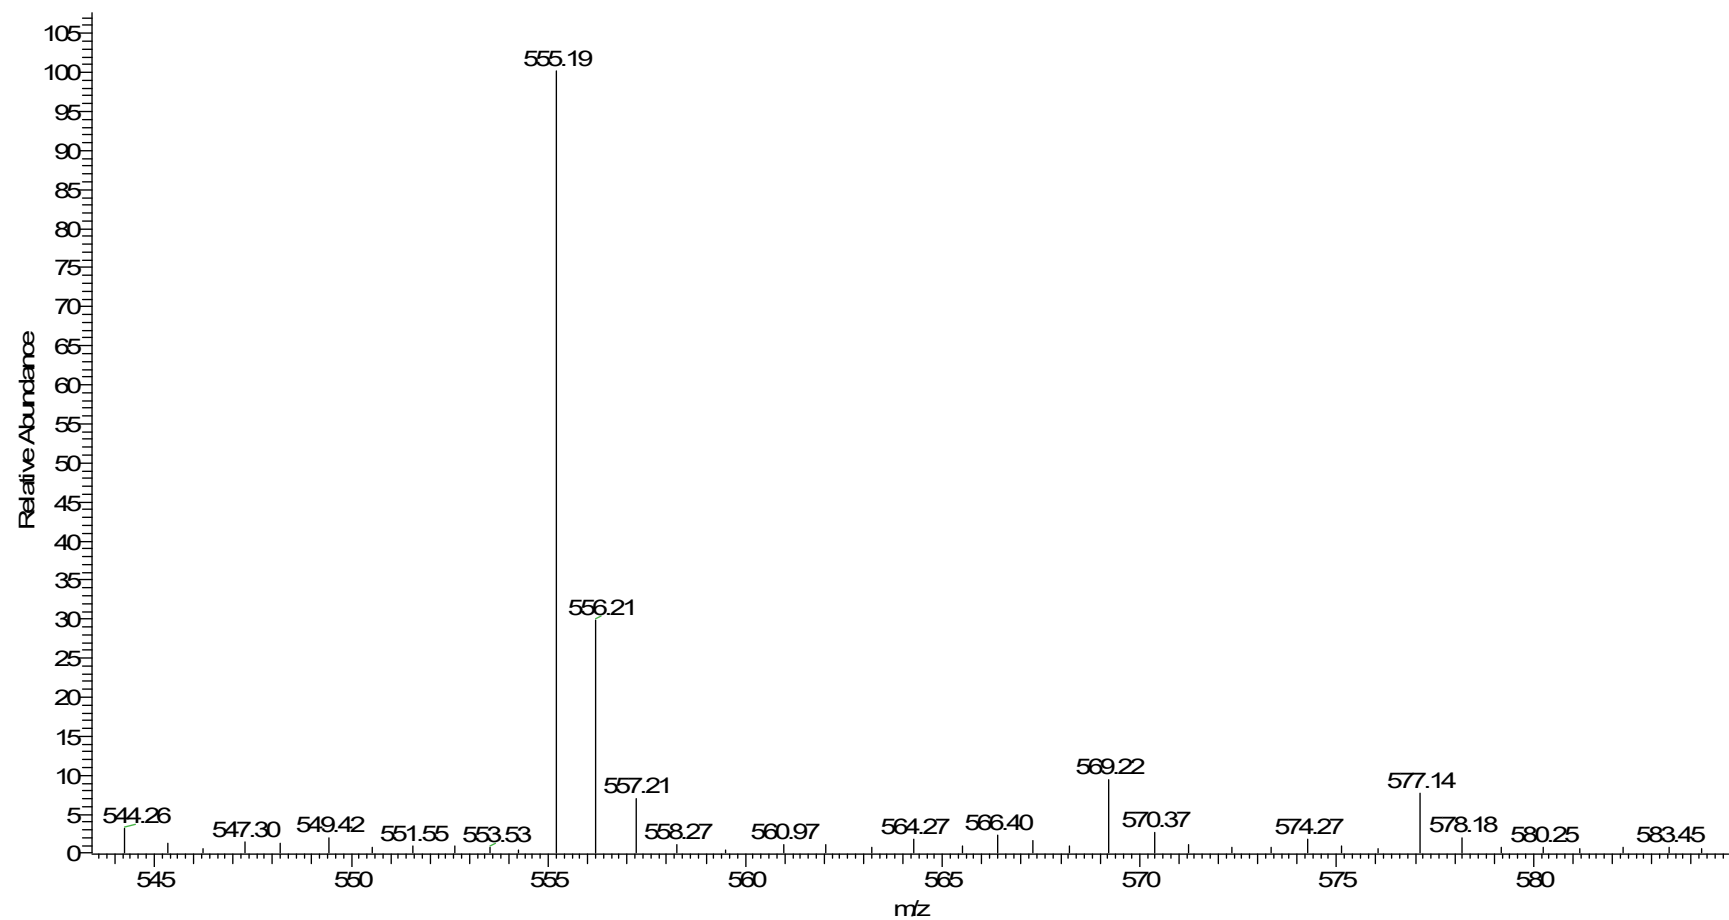

Fig.S69: ESI-MS spectrum of compound 10k

H02\_20191127055723 #76 RT: 0.19 AV: 1 NL: 1.39E6  
T: +cESI Q1MS [500.000-650.000]

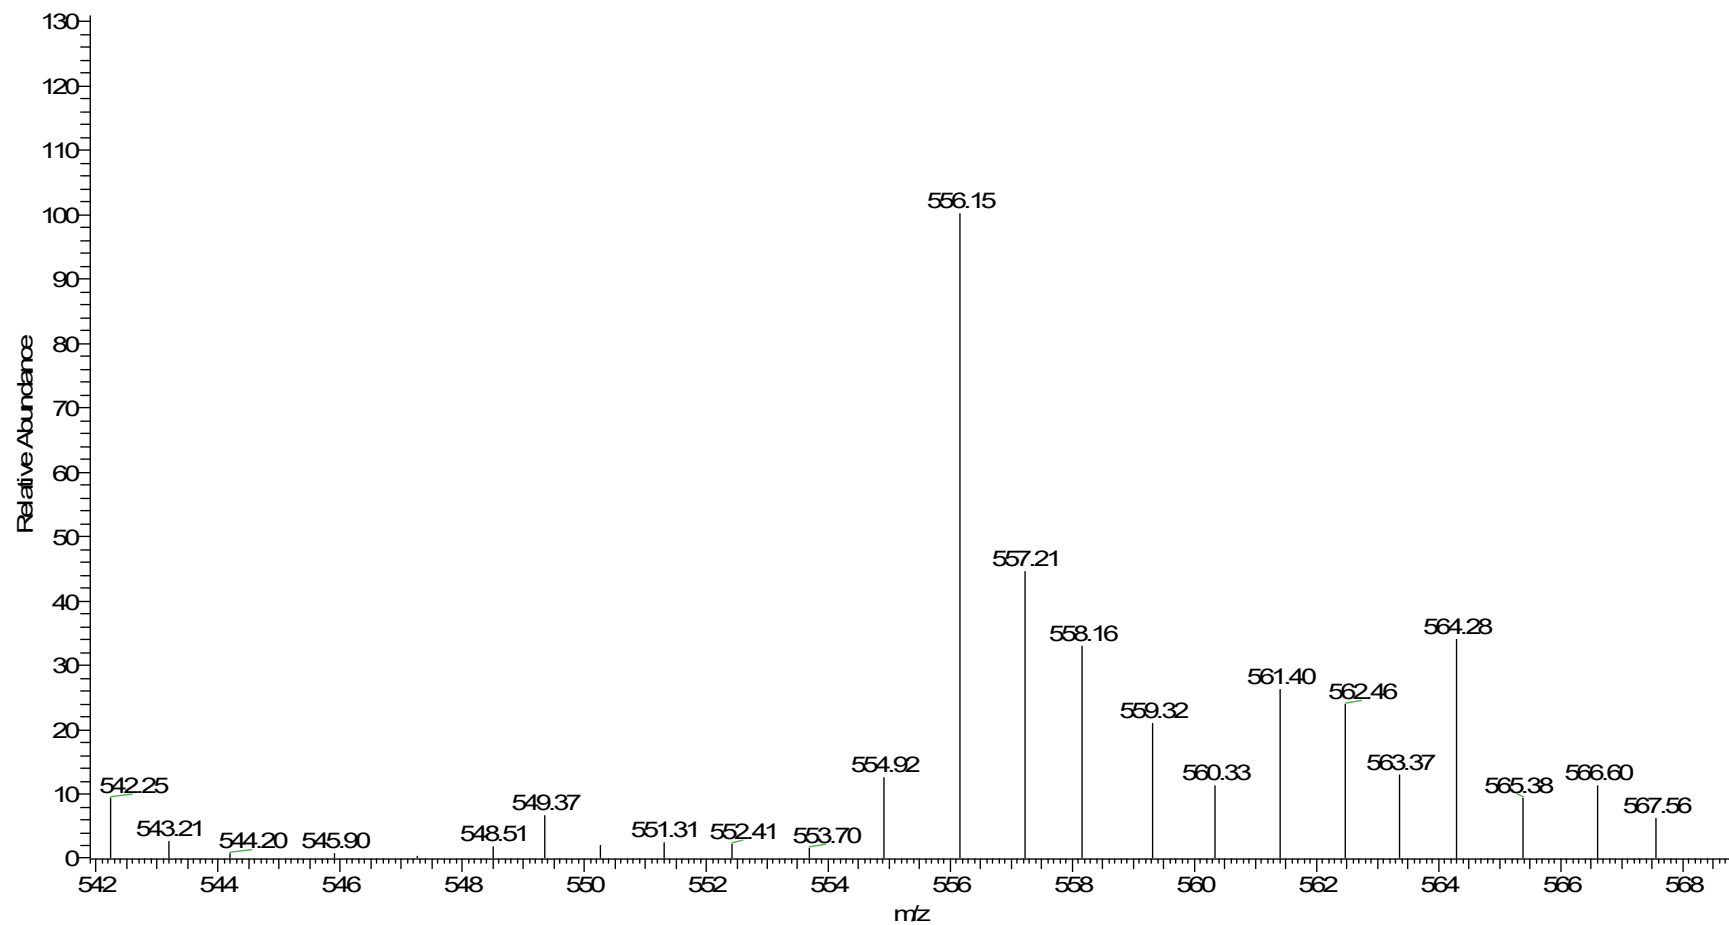

Fig.S70: ESI-MS spectrum of compound 10m

8-20200106040836 #37 RT: 0.02 AV: 1 NL: 3.57E6  
T: +c ESI Q1MS [550.000-580.000]

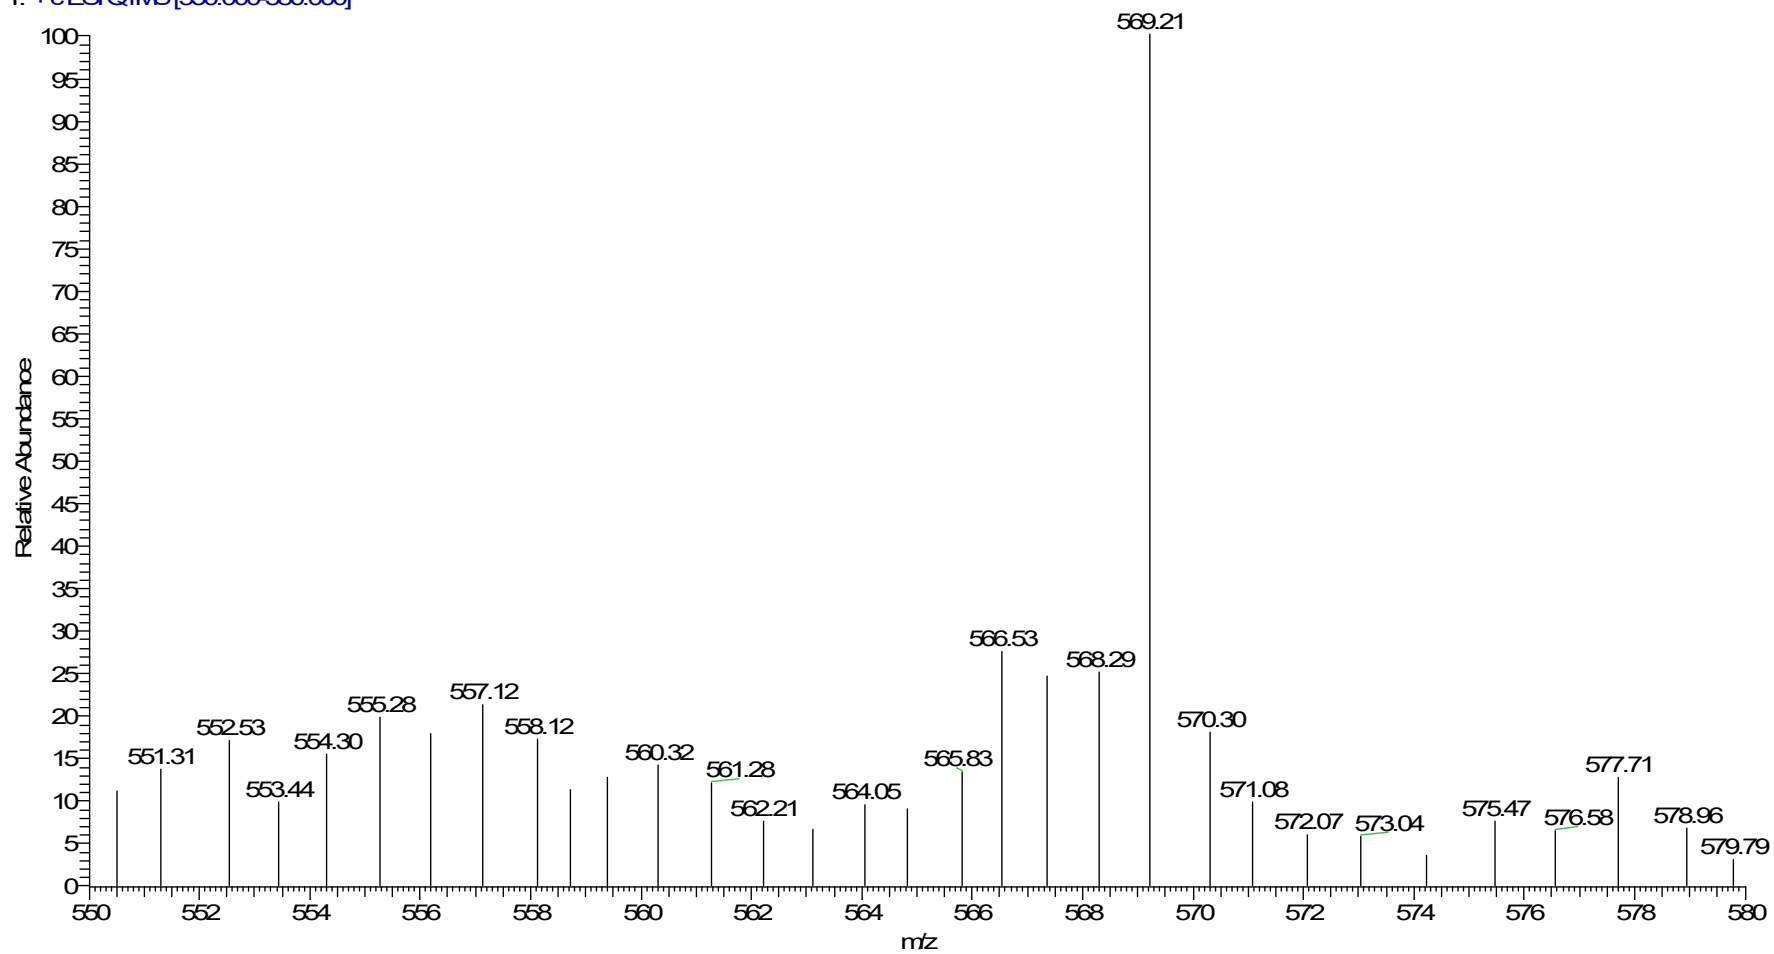

Fig.S71: ESI-MS spectrum of compound 10n
